# Supplementary material for: Stereocalpin B, a New Cyclic Depsipeptide from the Antarctic Lichen Ramalina terebrata
Source: MDPI journal article supplement (doi:10.3390/metabo12020141), 2022-02-03
Supplement: s1 [file s1]

## Supporting Information

### **Stereocalpin B, a new cyclic depsipeptide from the Antarctic lichen *Ramalina terebrata***

Seulah Lee <sup>1</sup>, Se Yun Jeong <sup>2</sup>, Dieu Linh Nguyen <sup>1,3</sup>, Jae Eun So <sup>1,3</sup>, Ki Hyun Kim <sup>2</sup>, Ji Hee Kim <sup>1</sup>, Se Jong Han <sup>1,3</sup>, Sung-Suk Suh <sup>4</sup>, Jun Hyuck Lee <sup>3,5</sup> and Ui Joung Youn <sup>1,3,\*</sup>

<sup>1</sup> Division of Life Sciences, Korea Polar Research Institute, KIOST, Incheon, 21990, Republic of Korea

<sup>2</sup> School of Pharmacy, Sungkyunkwan University, Suwon 16419, Republic of Korea

<sup>3</sup> Department of Polar Sciences, University of Science and Technology, Incheon 21990, Republic of Korea

<sup>4</sup> Department of Bioscience, Mokpo National University, Muan, Republic of Korea

<sup>5</sup> Research Unit of Cryogenic Novel Material, Korea Polar Research Institute, Incheon 21990, Republic of Korea

\* Corresponding author: Ui Joung Youn, Tel: +82-32-760-5562; Fax: +82-32-760-5509; E-mail: [ujyoun@kopri.re.kr](mailto:ujyoun@kopri.re.kr)

## List of Electronic Supplementary Information

|                                                                                                                                                                                        |    |
|----------------------------------------------------------------------------------------------------------------------------------------------------------------------------------------|----|
| <b>Figure S1.</b> HR-FABMS data of <b>1</b> .....                                                                                                                                      | 4  |
| <b>Figure S2.</b> UV spectrum of <b>1</b> .....                                                                                                                                        | 5  |
| <b>Figure S3.</b> IR spectrum of <b>1</b> .....                                                                                                                                        | 6  |
| <b>Figure S4.</b> <sup>1</sup> H NMR spectrum of <b>1</b> (CDCl <sub>3</sub> , 600 MHz).....                                                                                           | 7  |
| <b>Figure S5.</b> <sup>1</sup> H- <sup>1</sup> H COSY spectrum of <b>1</b> (CDCl <sub>3</sub> ).....                                                                                   | 8  |
| <b>Figure S6.</b> NOESY spectrum of <b>1</b> (CDCl <sub>3</sub> ).....                                                                                                                 | 9  |
| <b>Figure S7.</b> HSQC spectrum of <b>1</b> (CDCl <sub>3</sub> ).....                                                                                                                  | 10 |
| <b>Figure S8.</b> HMBC spectrum of <b>1</b> (CDCl <sub>3</sub> ).....                                                                                                                  | 11 |
| <b>Figure S9.</b> MS/MS spectrum analysis of <b>1</b> .....                                                                                                                            | 12 |
| <b>Figure S10.</b> Illustrative portion of the NOESY/EXSY spectrum of <b>1</b> showing exchanged cross-peaks (light blue) between signals of <b>1a</b> and <b>1b</b> (red arrows)..... | 13 |
| <b>Figure S11.</b> Advanced Marfey's analysis of <b>1</b> .....                                                                                                                        | 14 |
| <b>Figure S12.</b> Possible stereoconversion of the C-22 methyl group of the proposed structure of stereocalpin A ( <b>2</b> ).....                                                    | 15 |
| <b>Figure S13.</b> Slice of 2D NOESY spectrum with H-5 irradiated for PANIC.....                                                                                                       | 16 |
| <b>Figure S14.</b> Slice of 2D NOESY spectrum with H <sub>3</sub> -10 in <b>1a</b> irradiated for PANIC.....                                                                           | 17 |
| <b>Figure S15.</b> Slice of 2D NOESY spectrum with H-2 in <b>1a</b> irradiated for PANIC.....                                                                                          | 18 |
| <b>Figure S16.</b> Slice of 2D NOESY spectrum with H-2 in <b>1b</b> irradiated for PANIC.....                                                                                          | 19 |
| <b>Figure S17.</b> Slice of 2D NOESY spectrum with H-12 in <b>1b</b> irradiated for PANIC.....                                                                                         | 20 |
| <b>Figure S18.</b> HR-FABMS data of <b>3</b> .....                                                                                                                                     | 21 |
| <b>Figure S19.</b> UV spectrum of <b>3</b> .....                                                                                                                                       | 22 |
| <b>Figure S20.</b> IR spectrum of <b>3</b> .....                                                                                                                                       | 23 |

|                                                                                                           |    |
|-----------------------------------------------------------------------------------------------------------|----|
| <b>Figure S21.</b> $^1\text{H}$ NMR spectrum of <b>3</b> (DMSO- $d_6$ , 600 MHz).....                     | 24 |
| <b>Figure S22.</b> $^{13}\text{C}$ NMR spectrum of <b>3</b> (DMSO- $d_6$ , 150 MHz).....                  | 25 |
| <b>Figure S23.</b> NOESY spectrum of <b>3</b> (DMSO- $d_6$ ).....                                         | 26 |
| <b>Figure S24.</b> HSQC spectrum of <b>3</b> (DMSO- $d_6$ ).....                                          | 27 |
| <b>Figure S25.</b> HMBC spectrum of <b>3</b> (DMSO- $d_6$ ).....                                          | 28 |
| <b>Table S1.</b> $\text{IC}_{50}$ values of compounds <b>1-3</b> against <i>E. coli</i> .....             | 29 |
| <b>Table S2.</b> Cytotoxicity of compounds <b>1</b> and <b>2</b> against HCT116 cells.....                | 30 |
| <b>Table S3.</b> NO inhibition of compounds <b>1</b> and <b>2</b> against LPS-induced RAW264.7 cells..... | 31 |
| <b>Table S4.</b> Gibbs free energies and Boltzmann distribution of conformer <b>1a</b> .....              | 32 |
| <b>Table S5.</b> Gibbs free energies and Boltzmann distribution of conformer <b>1b</b> .....              | 32 |
| <b>Coordinates of the conformers</b> .....                                                                | 33 |

**Figure S1. HR-FABMS data of 1**

[ Mass Spectrum ]

Data : FAB-B303 Date : 05-Nov-2020 15:17

RT : 0.00 min Scan# : (1,27)

Elements : C 100/0, H 100/0, N 10/0, O 10/0

Mass Tolerance : 20ppm, 5mmu if m/z < 250, 20mmu if m/z > 1000

Unsaturation (U.S.) : -0.5 - 20.0

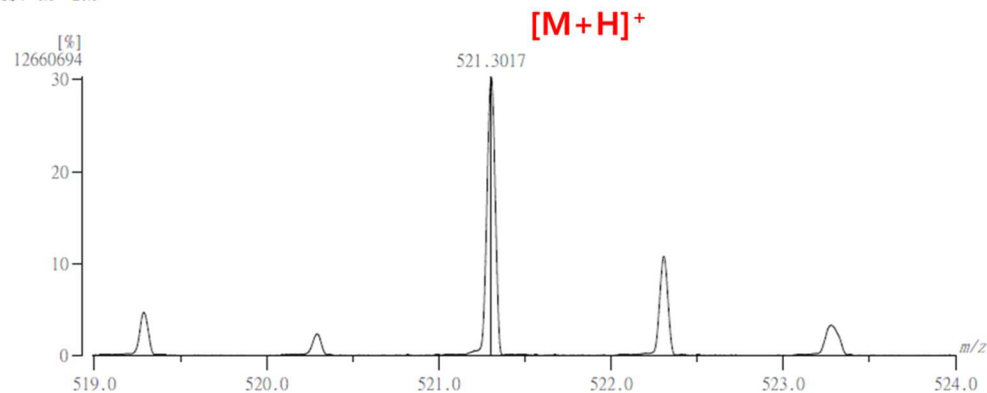

| Observed m/z | Int%  | Err [ppm / mmu] | U.S. | Composition     |
|--------------|-------|-----------------|------|-----------------|
| 1 521.3017   | 30.27 | +0.3 / +0.2     | 18.0 | C30 H35 N9      |
| 2            |       | -2.3 / -1.2     | 17.5 | C32 H37 N6 O    |
| 3            |       | -4.8 / -2.5     | 17.0 | C34 H39 N3 O2   |
| 4            |       | +19.3 / +10.0   | 17.5 | C33 H37 N4 O2   |
| 5            |       | -16.1 / -8.4    | 13.5 | C26 H37 N10 O2  |
| 6            |       | -7.4 / -3.9     | 16.5 | C36 H41 O3      |
| 7            |       | +16.7 / +8.7    | 17.0 | C35 H39 N O3    |
| 8            |       | -18.7 / -9.7    | 13.0 | C28 H39 N7 O3   |
| 9            |       | +5.4 / +2.8     | 13.5 | C27 H37 N8 O3   |
| 10           |       | +2.9 / +1.5     | 13.0 | C29 H39 N5 O4   |
| 11           |       | +0.3 / +0.2     | 12.5 | C31 H41 N2 O5   |
| 12           |       | -11.0 / -5.7    | 9.0  | C23 H39 N9 O5   |
| 13           |       | +13.2 / +6.9    | 9.5  | C22 H37 N10 O5  |
| 14           |       | -13.5 / -7.1    | 8.5  | C25 H41 N6 O6   |
| 15           |       | +10.6 / +5.5    | 9.0  | C24 H39 N7 O6   |
| 16           |       | -16.1 / -8.4    | 8.0  | C27 H43 N3 O7   |
| 17           |       | +8.0 / +4.2     | 8.5  | C26 H41 N4 O7   |
| 18           |       | -18.7 / -9.7    | 7.5  | C29 H45 O8      |
| 19           |       | +5.4 / +2.8     | 8.0  | C28 H43 N O8    |
| 20           |       | -5.8 / -3.0     | 4.5  | C20 H41 N8 O8   |
| 21           |       | +18.3 / +9.5    | 5.0  | C19 H39 N9 O8   |
| 22           |       | -8.4 / -4.4     | 4.0  | C22 H43 N5 O9   |
| 23           |       | +15.7 / +8.2    | 4.5  | C21 H41 N6 O9   |
| 24           |       | -11.0 / -5.7    | 3.5  | C24 H45 N2 O10  |
| 25           |       | +13.1 / +6.9    | 4.0  | C23 H43 N3 O10  |
| 26           |       | +1.9 / +1.0     | 0.5  | C15 H41 N10 O10 |

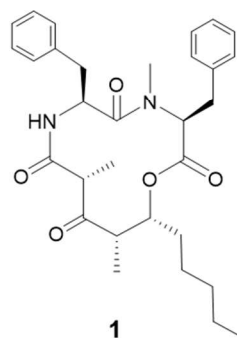

**Figure S2.** UV spectrum of **1**

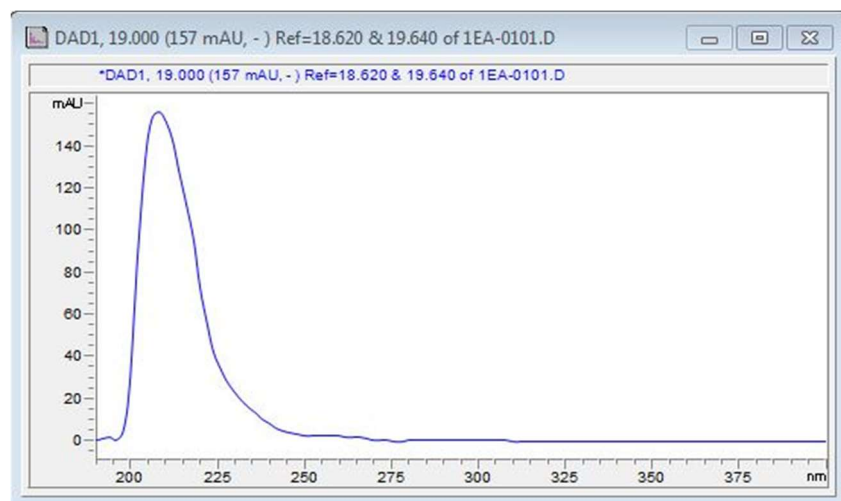

**Figure S3.** IR spectrum of **1**

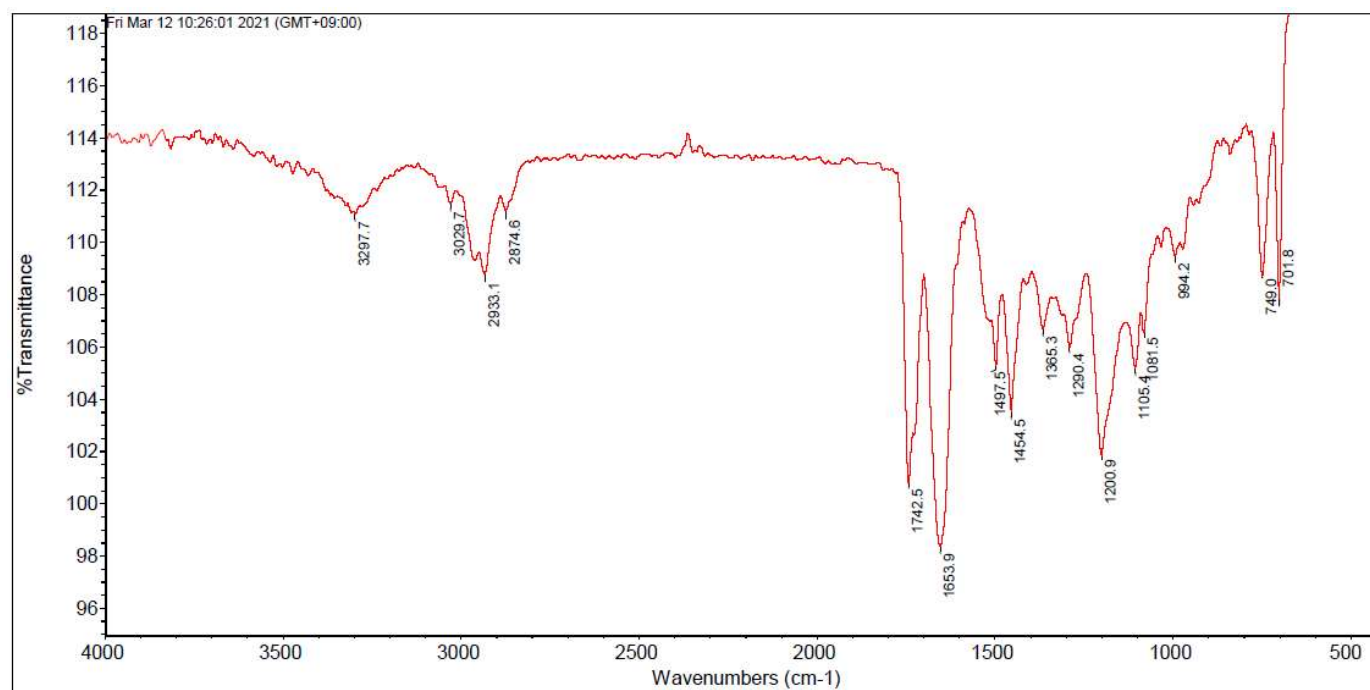

Fri Mar 12 10:32:45 2021 (GMT+09:00)

FIND PEAKS:

Spectrum: Fri Mar 12 10:26:01 2021 (GMT+09:00)

Region: 4000.0 400.0

Absolute threshold: 112.472

Sensitivity: 59

Peak list:

|           |        |            |         |
|-----------|--------|------------|---------|
| Position: | 701.8  | Intensity: | 107.770 |
| Position: | 749.0  | Intensity: | 108.670 |
| Position: | 994.2  | Intensity: | 109.472 |
| Position: | 1081.5 | Intensity: | 106.450 |
| Position: | 1105.4 | Intensity: | 105.182 |
| Position: | 1200.9 | Intensity: | 101.790 |
| Position: | 1290.4 | Intensity: | 105.938 |
| Position: | 1365.3 | Intensity: | 106.697 |

**Figure S4.**  $^1\text{H}$  NMR spectrum of **1** ( $\text{CDCl}_3$ , 600 MHz)

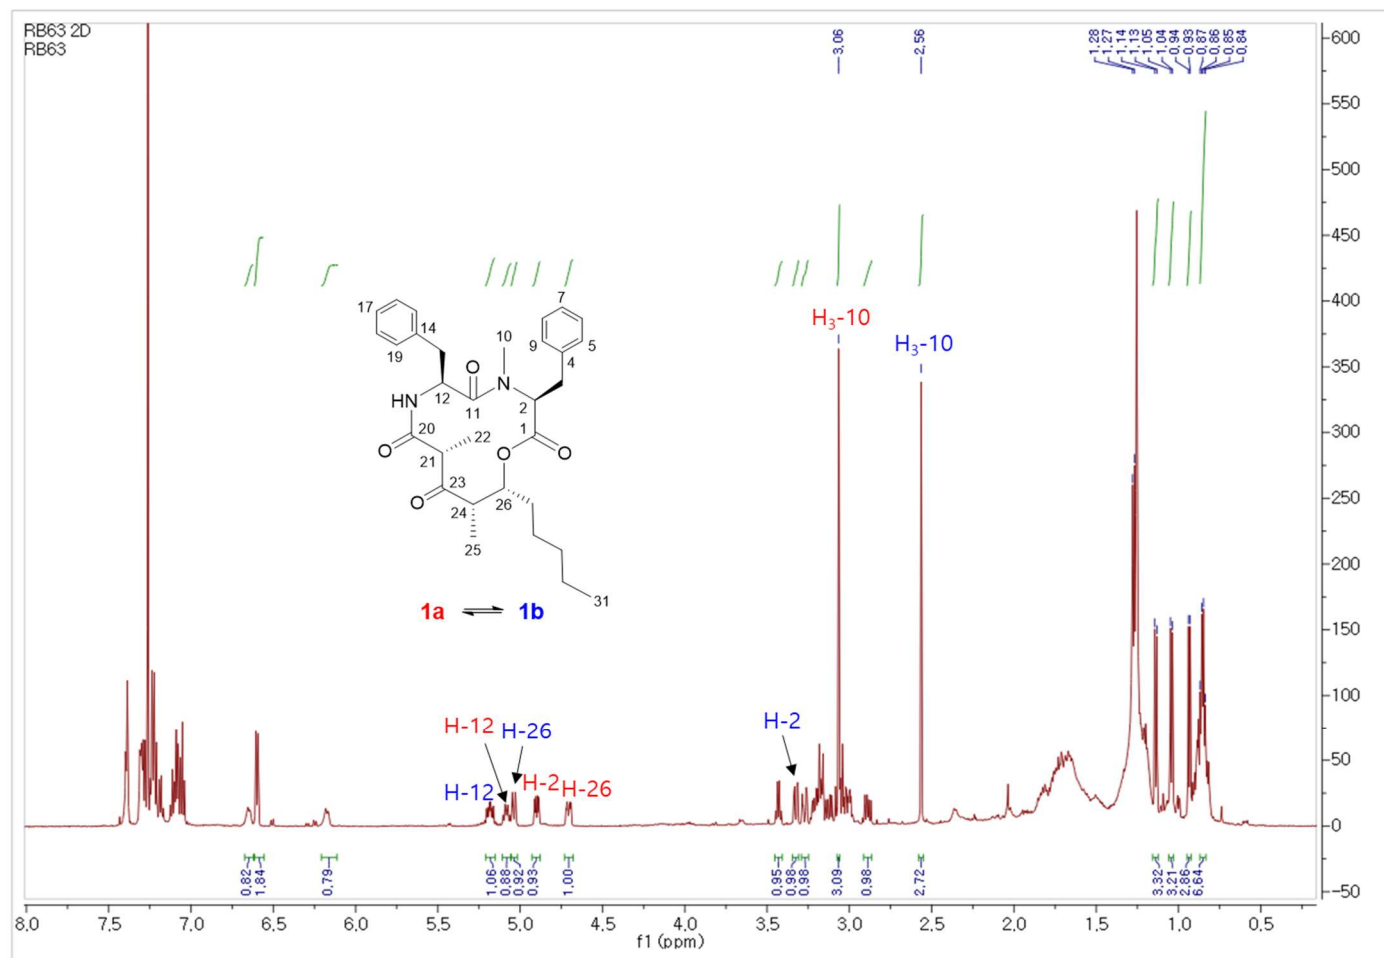

**Figure S5.**  $^1\text{H}$ - $^1\text{H}$  COSY spectrum of **1** ( $\text{CDCl}_3$ )

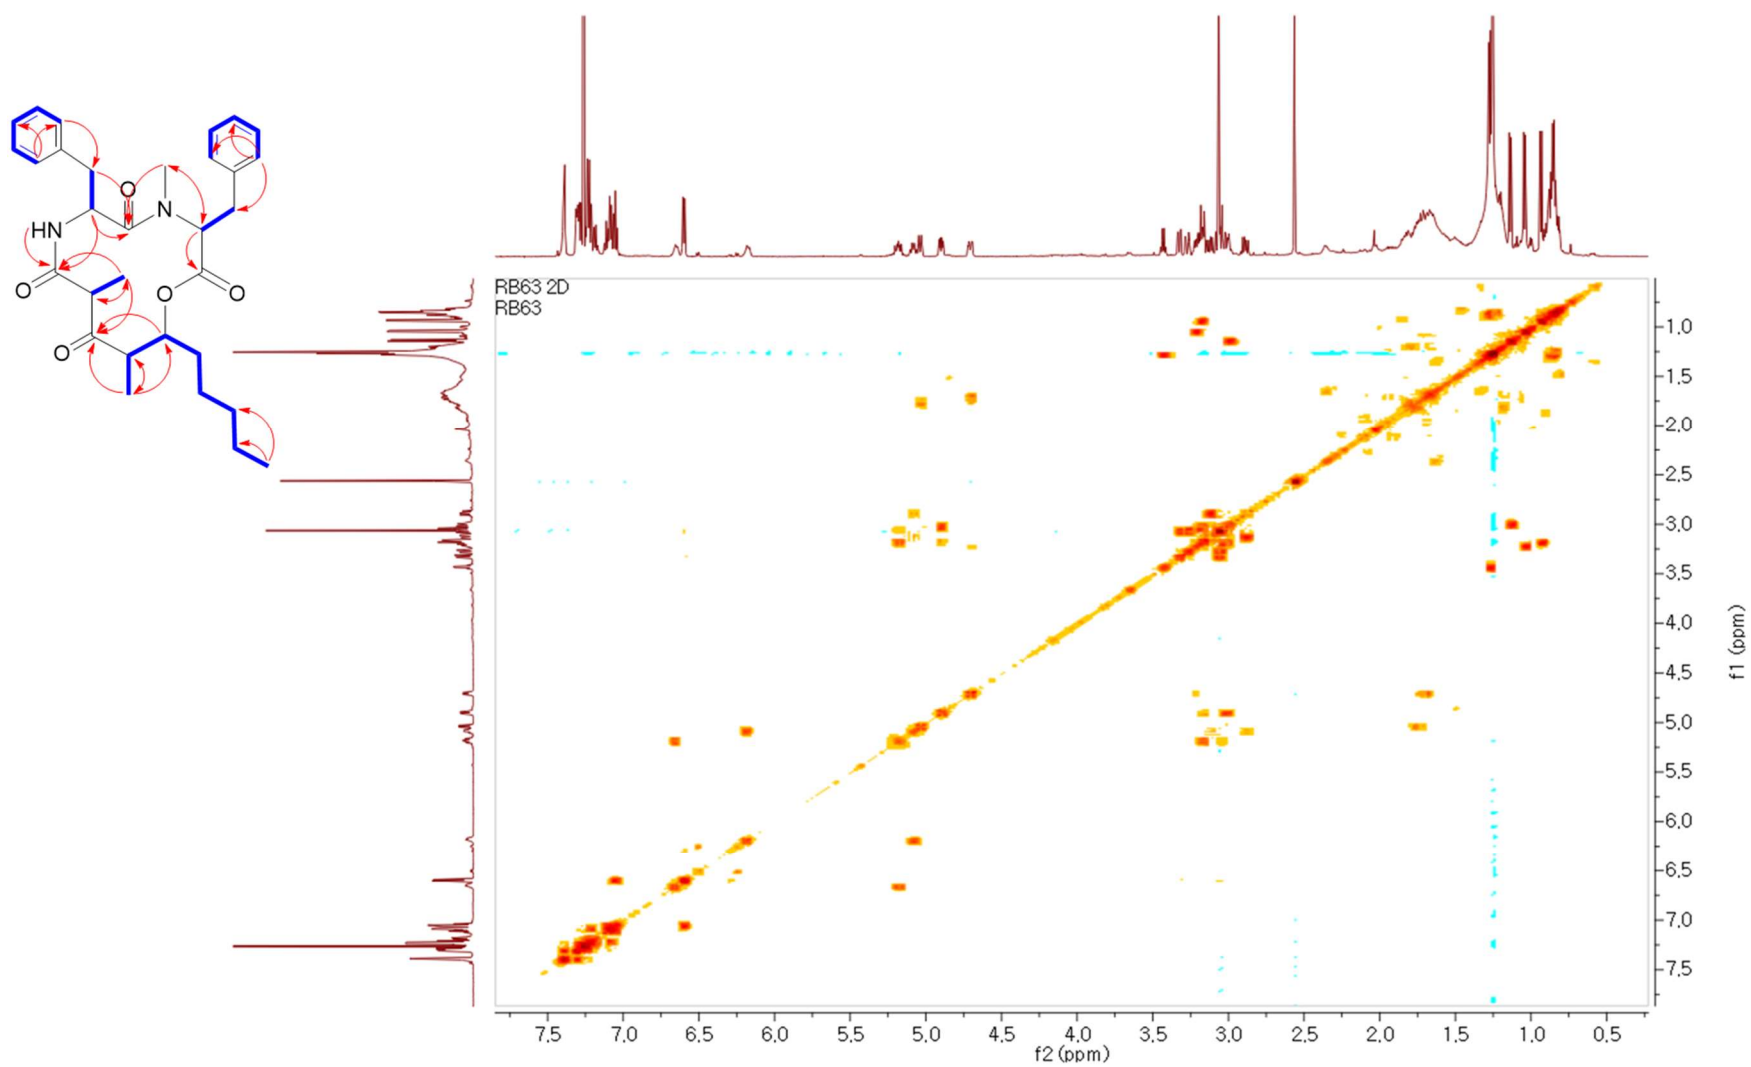



**Figure S6.** NOESY spectrum of **1** (CDCl<sub>3</sub>)

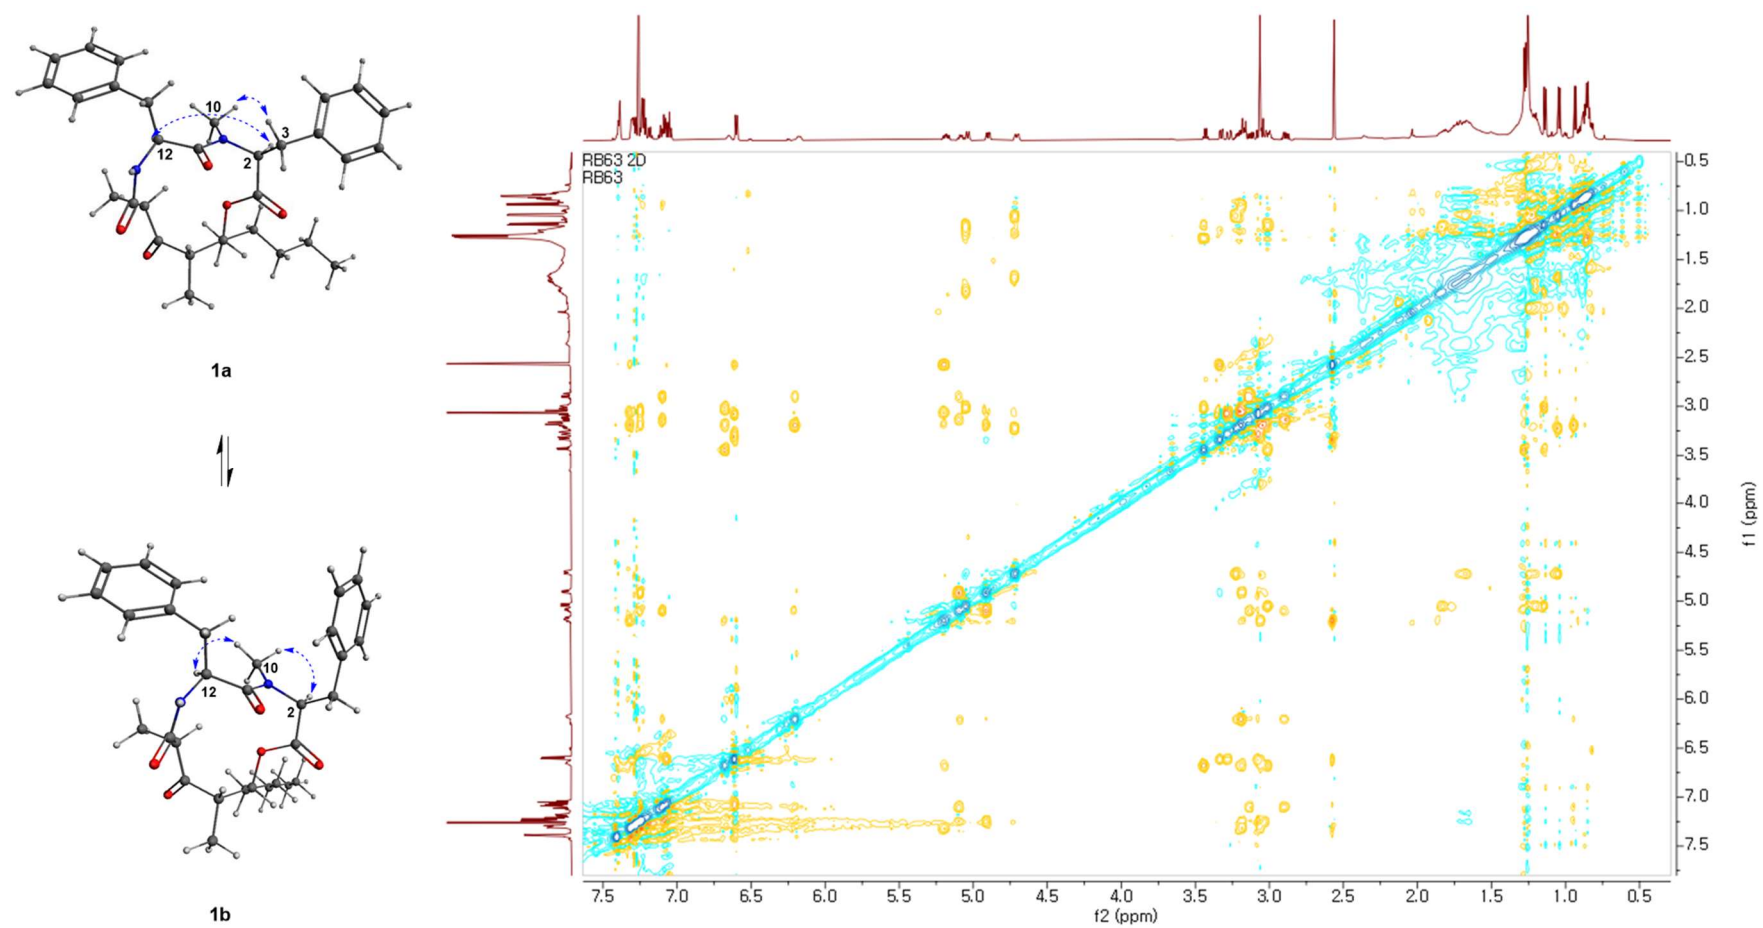

**Figure S7.** HSQC spectrum of **1** (CDCl<sub>3</sub>)

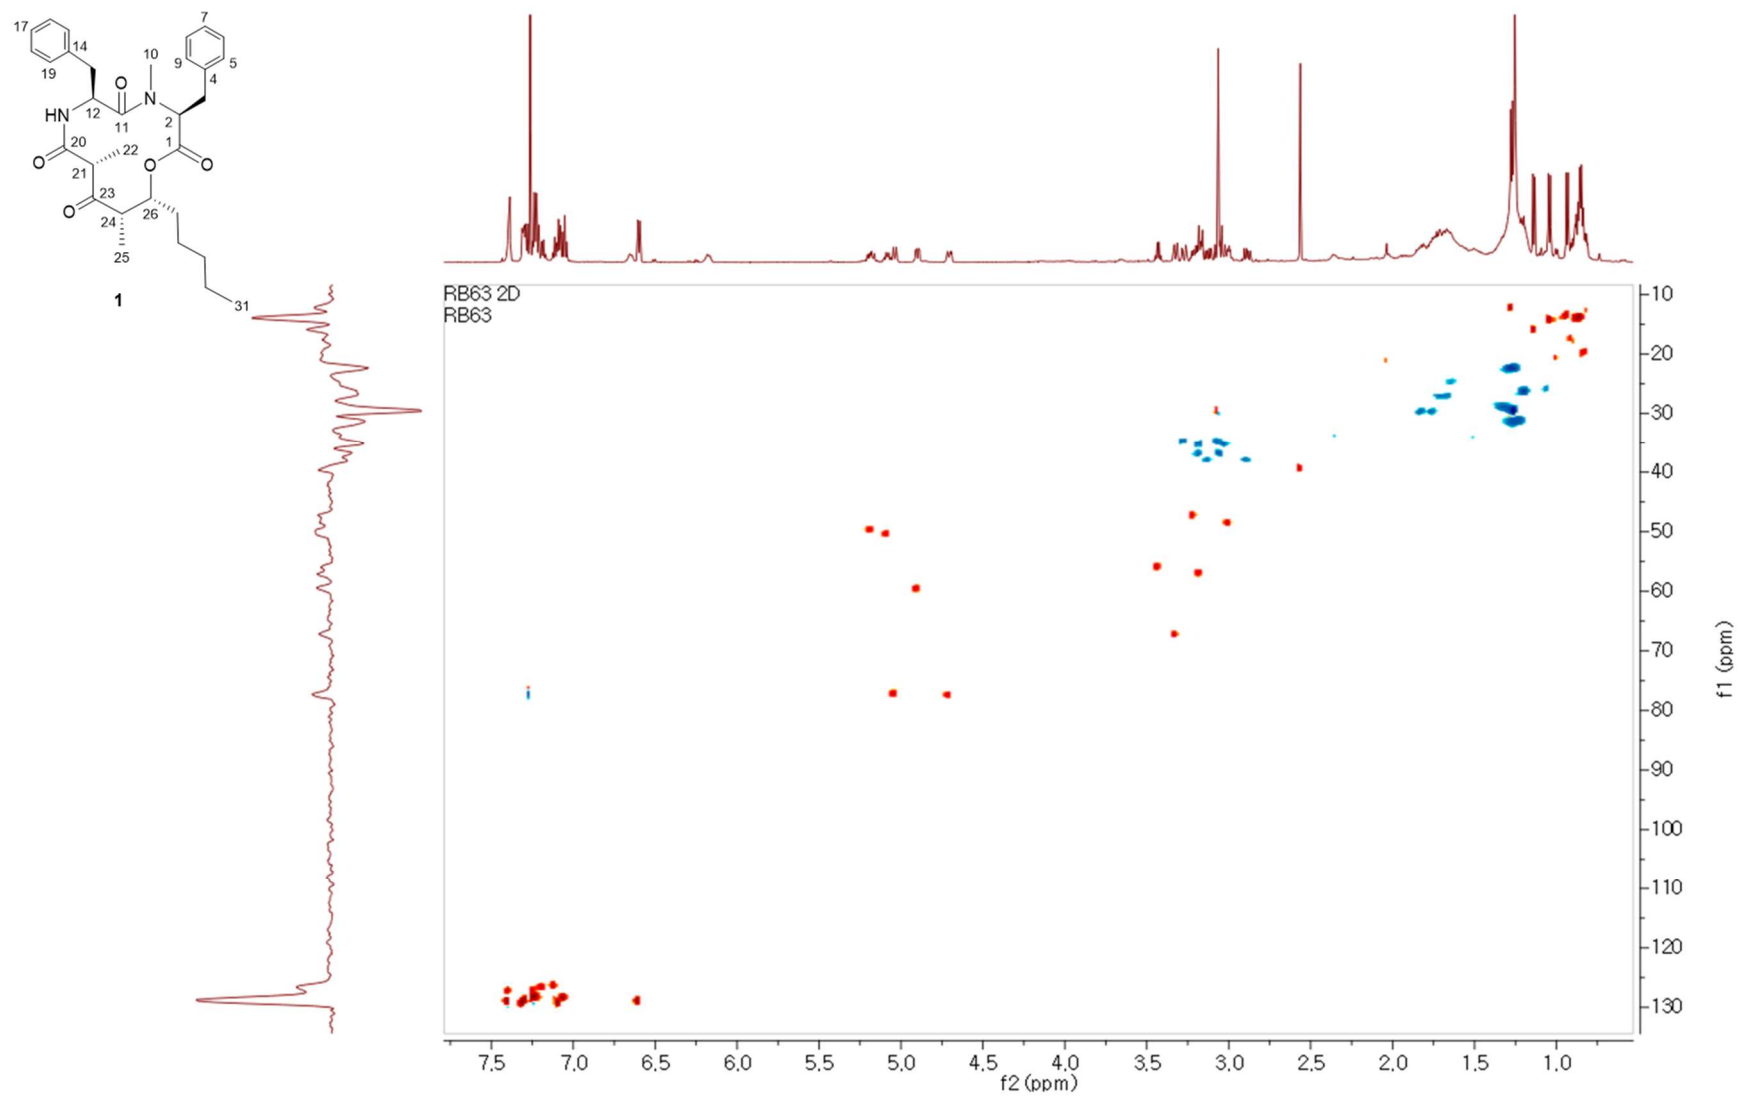

**Figure S8.** HMBC spectrum of **1** (CDCl<sub>3</sub>)

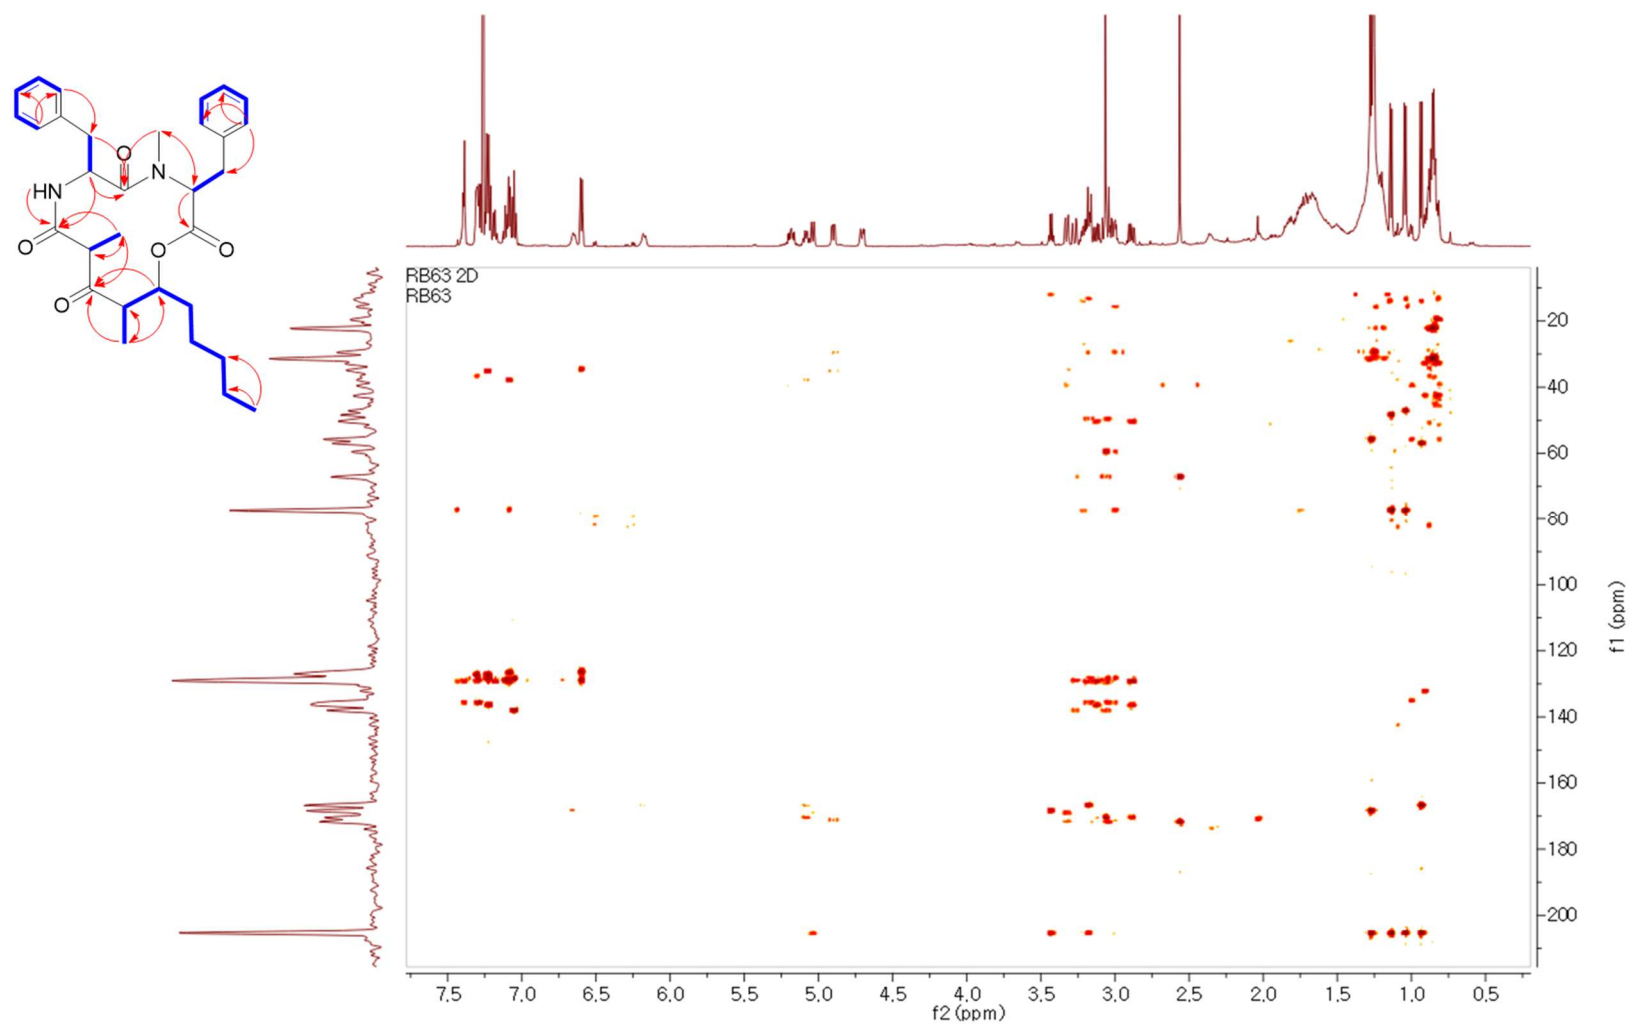

**Figure S9.** MS/MS spectrum analysis of **1**

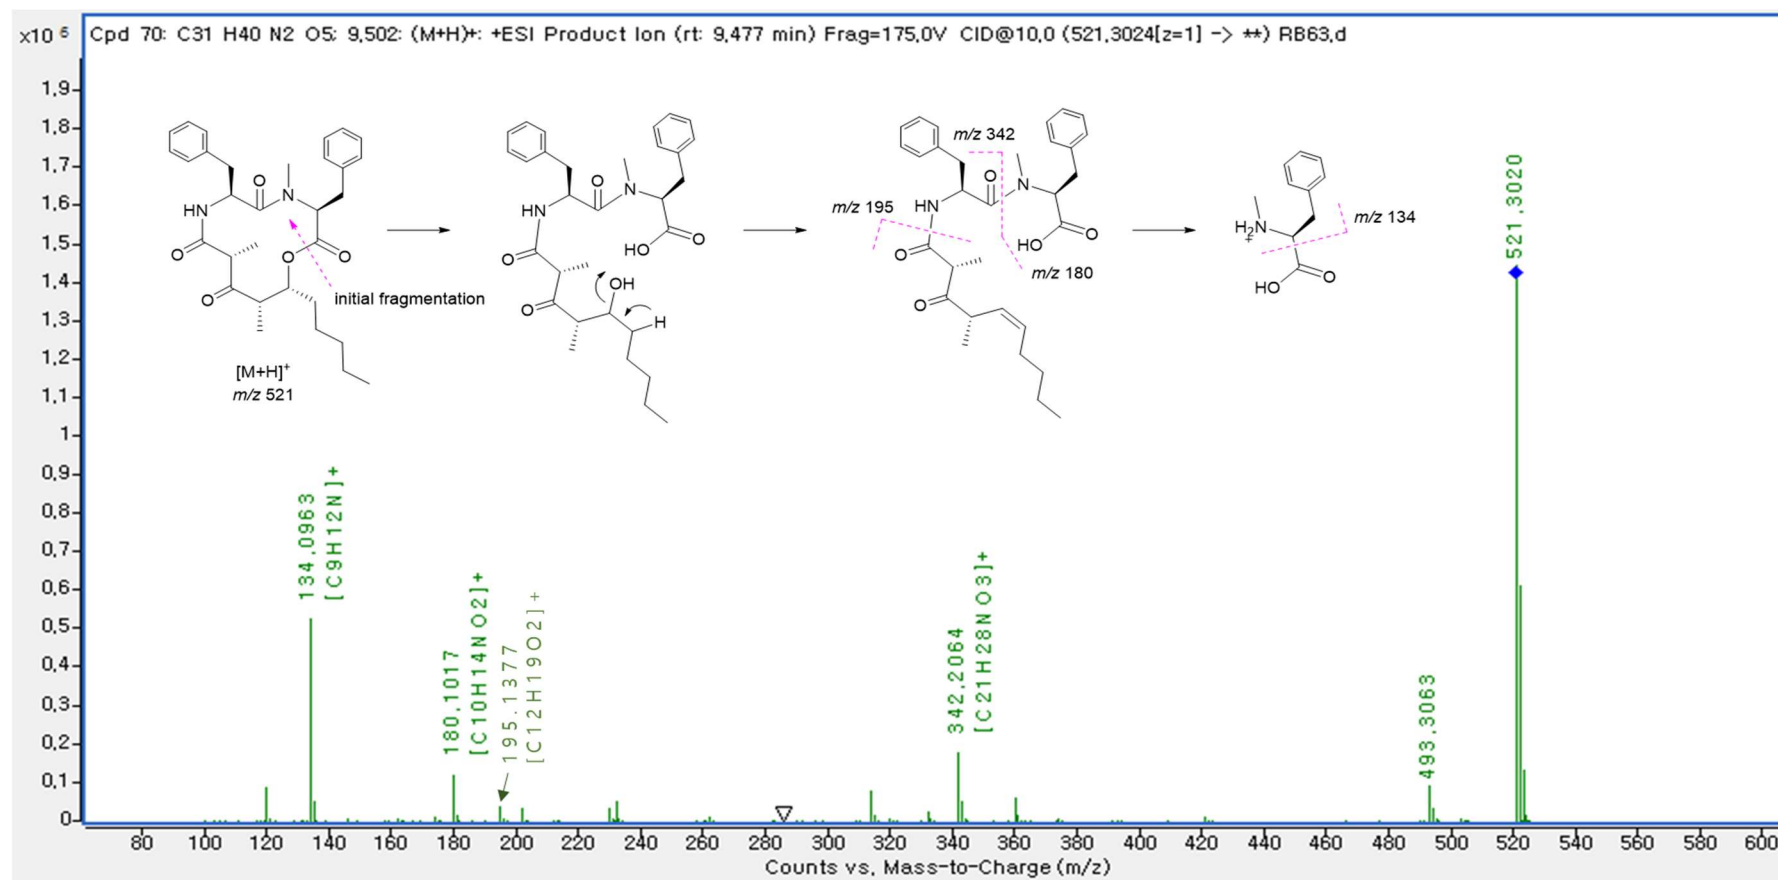

**Figure S10.** Illustrative portion of the NOESY/EXSY spectrum of **1** showing exchanged cross-peaks (light blue) between signals of **1a** and **1b** (red arrows)

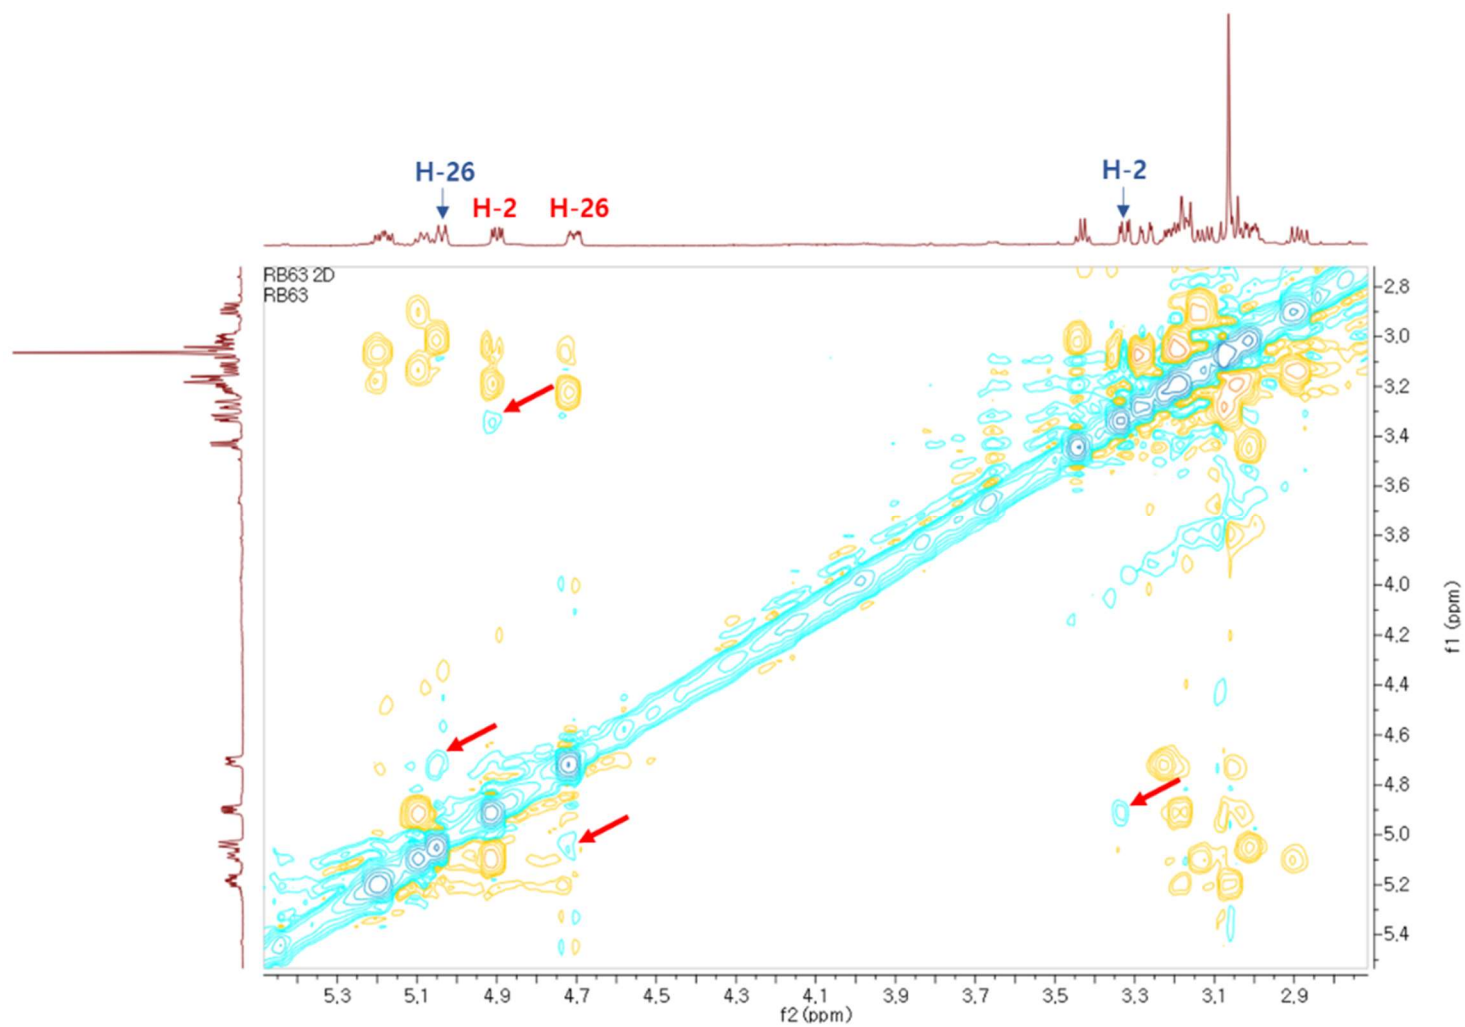

**Figure S11.** Advanced Marfey's analysis of **1** by LC-MS. Selective ion monitoring channels were set up at  $m/z$  418 (a) and  $m/z$  432 (b)

(a)

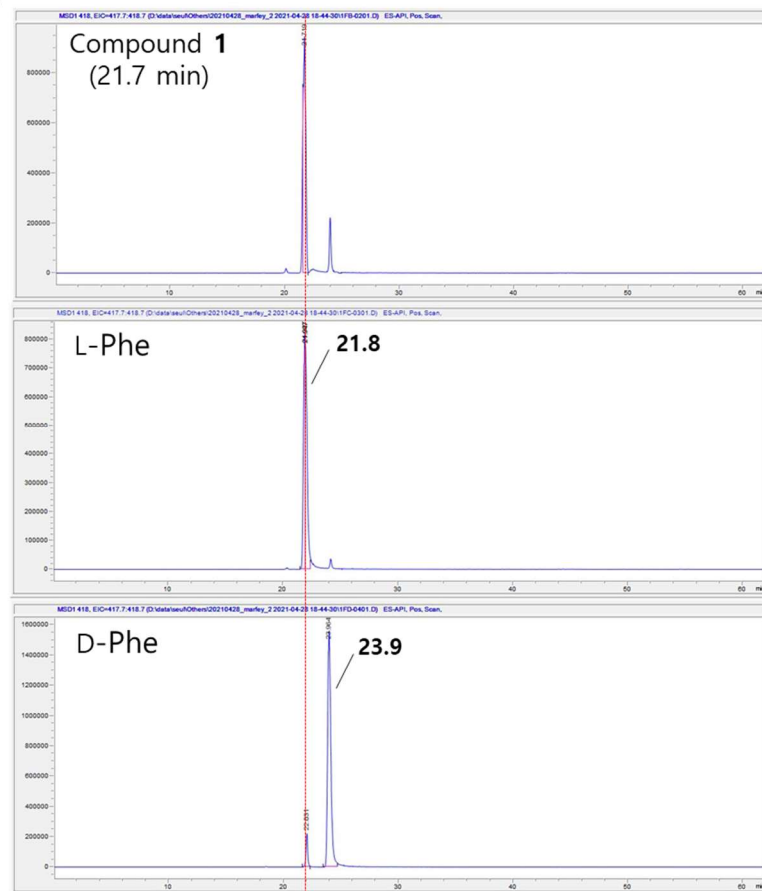

(b)

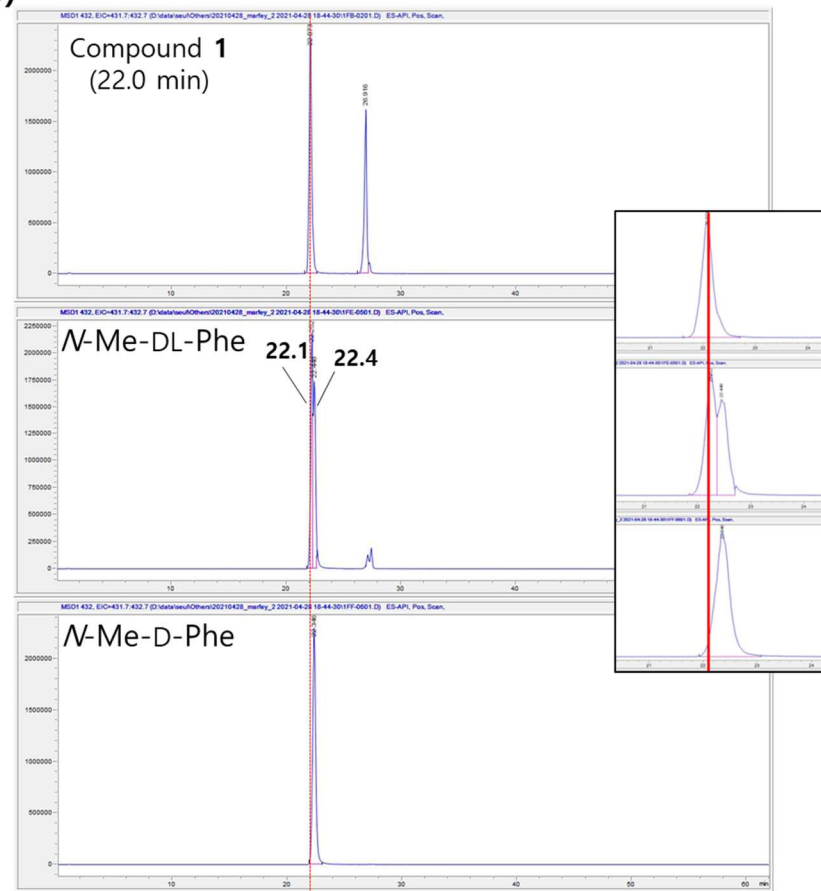

**Figure S12.** Possible stereoconversion of the C-22 methyl group of the proposed structure of stereocalpin A (**2**)

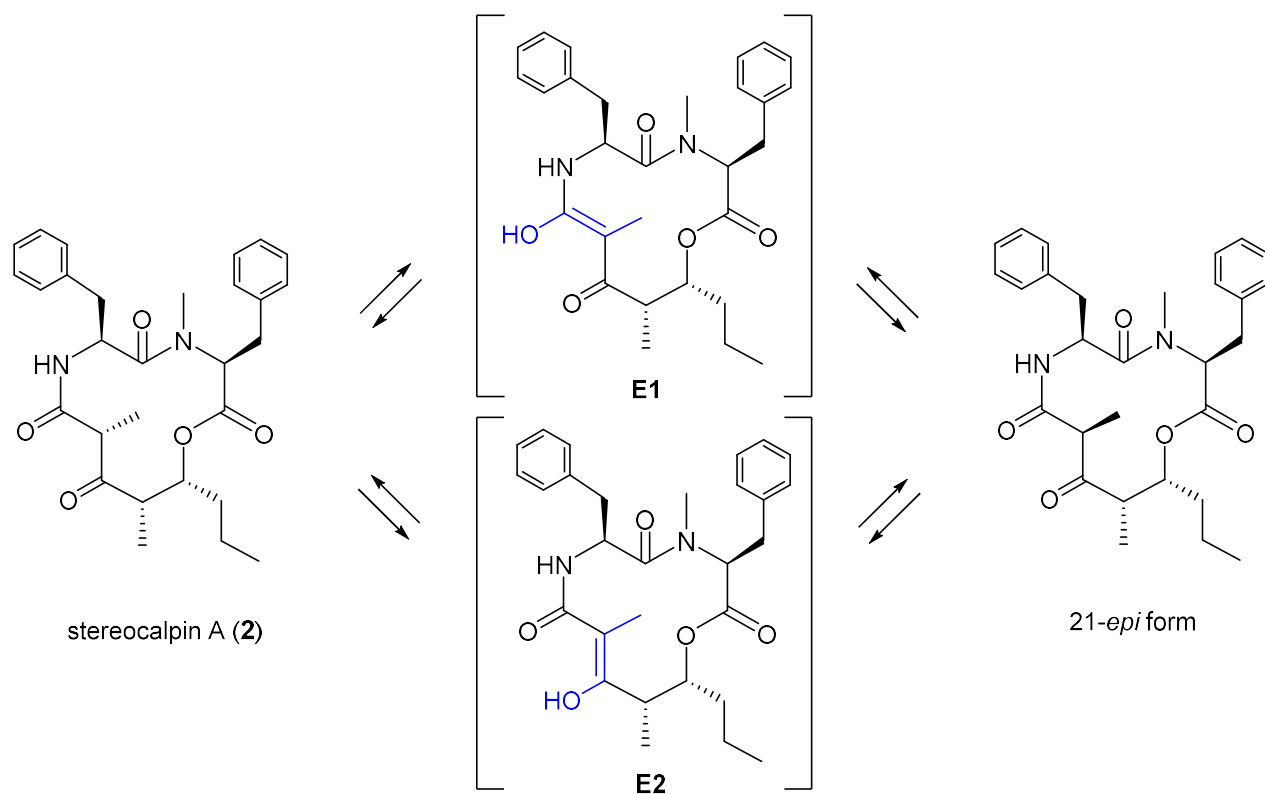

**Figure S13.** Slice of 2D NOESY spectrum with H-5 irradiated for PANIC

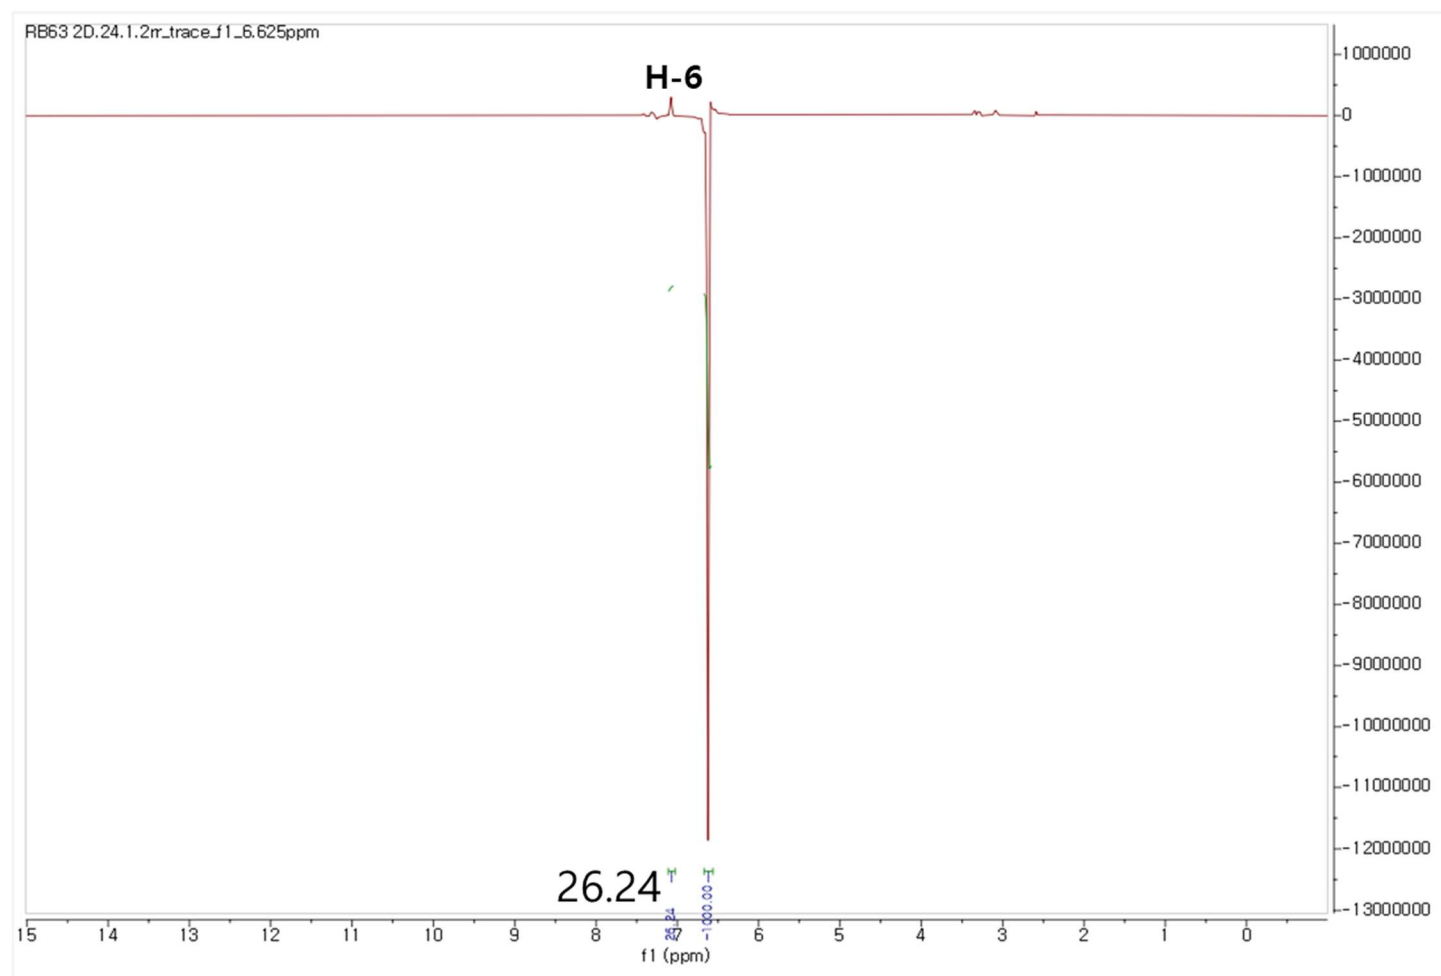



**Figure S14.** Slice of 2D NOESY spectrum with H<sub>3</sub>-10 in **1a** irradiated for PANIC

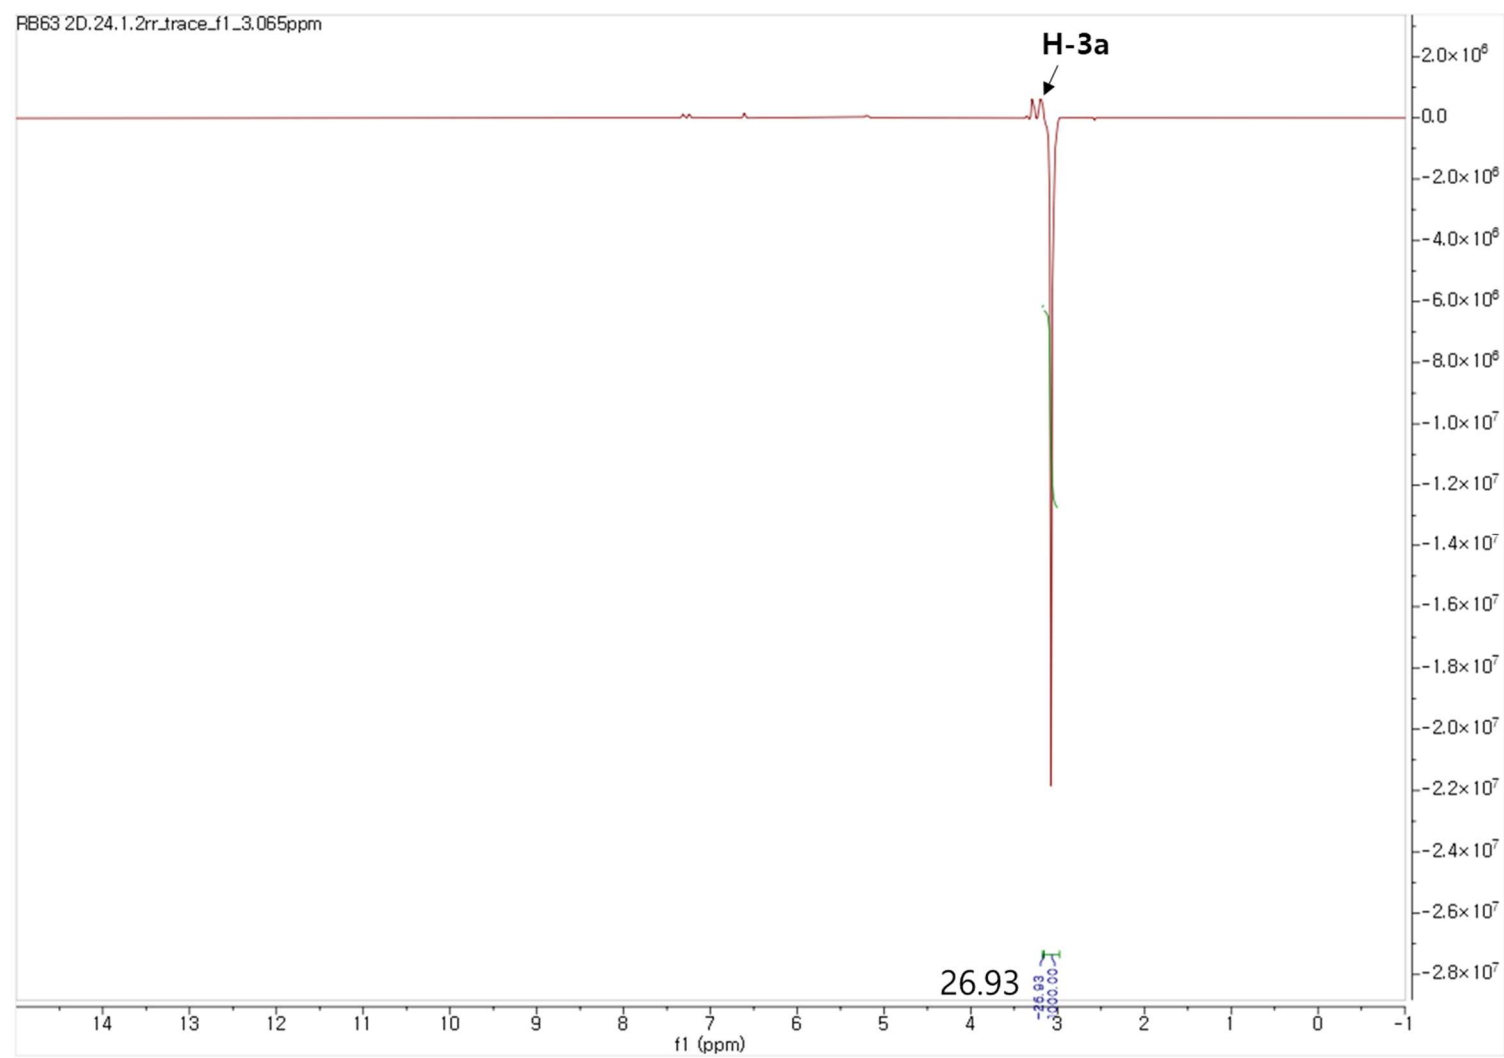

**Figure S15.** Slice of 2D NOESY spectrum with H-2 in **1a** irradiated for PANIC

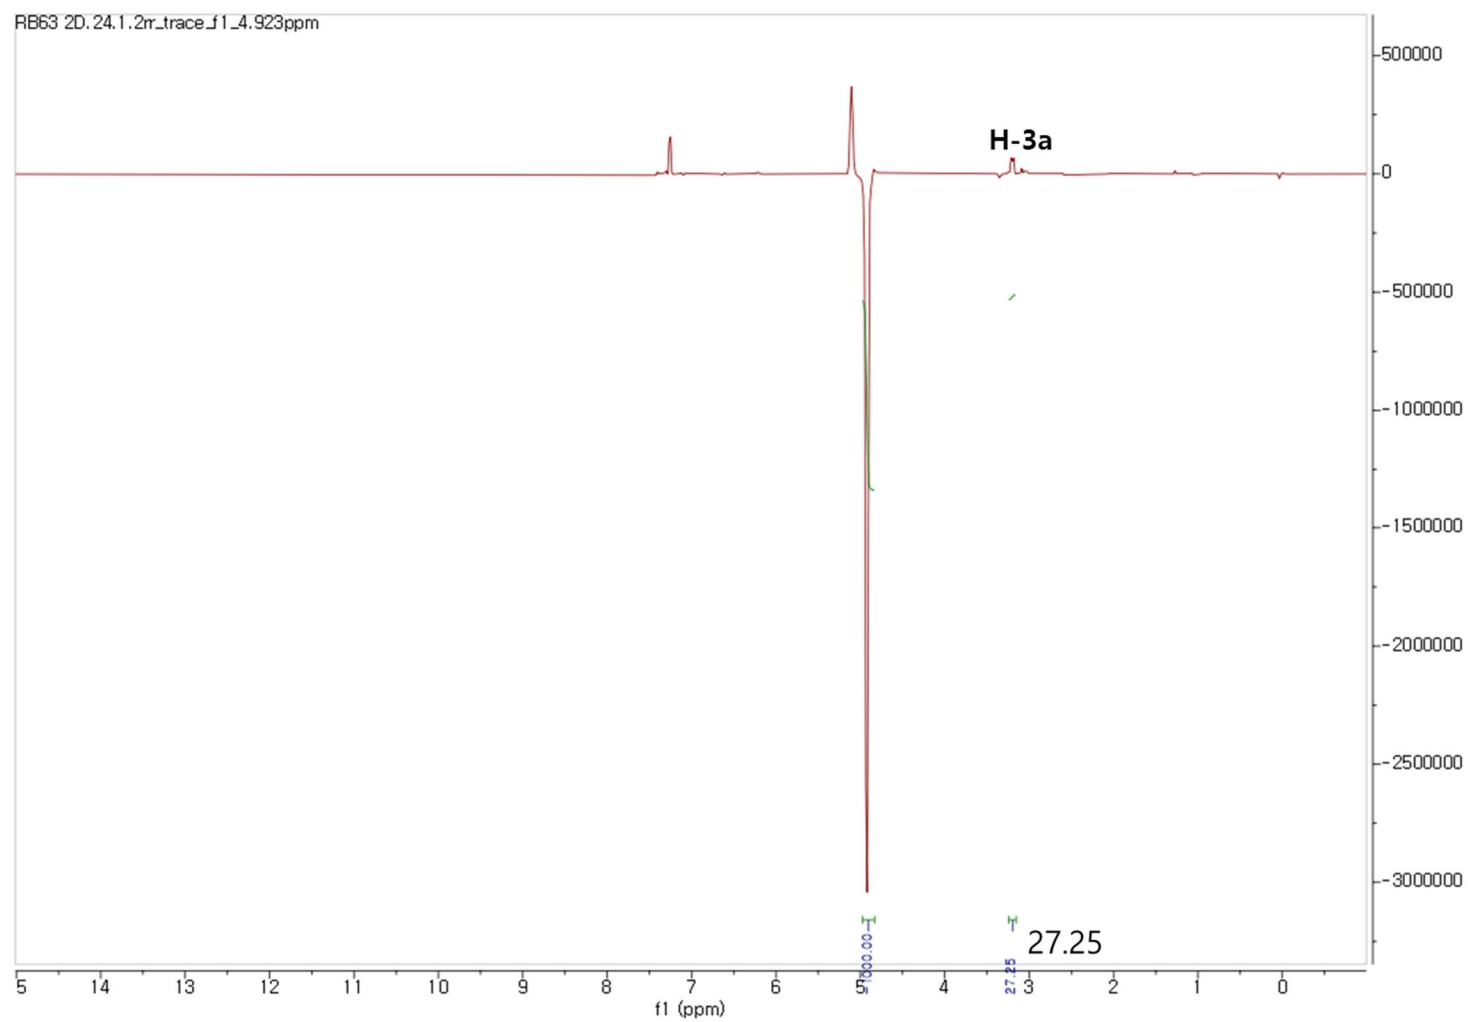

**Figure S16.** Slice of 2D NOESY spectrum with H-2 in **1b** irradiated for PANIC

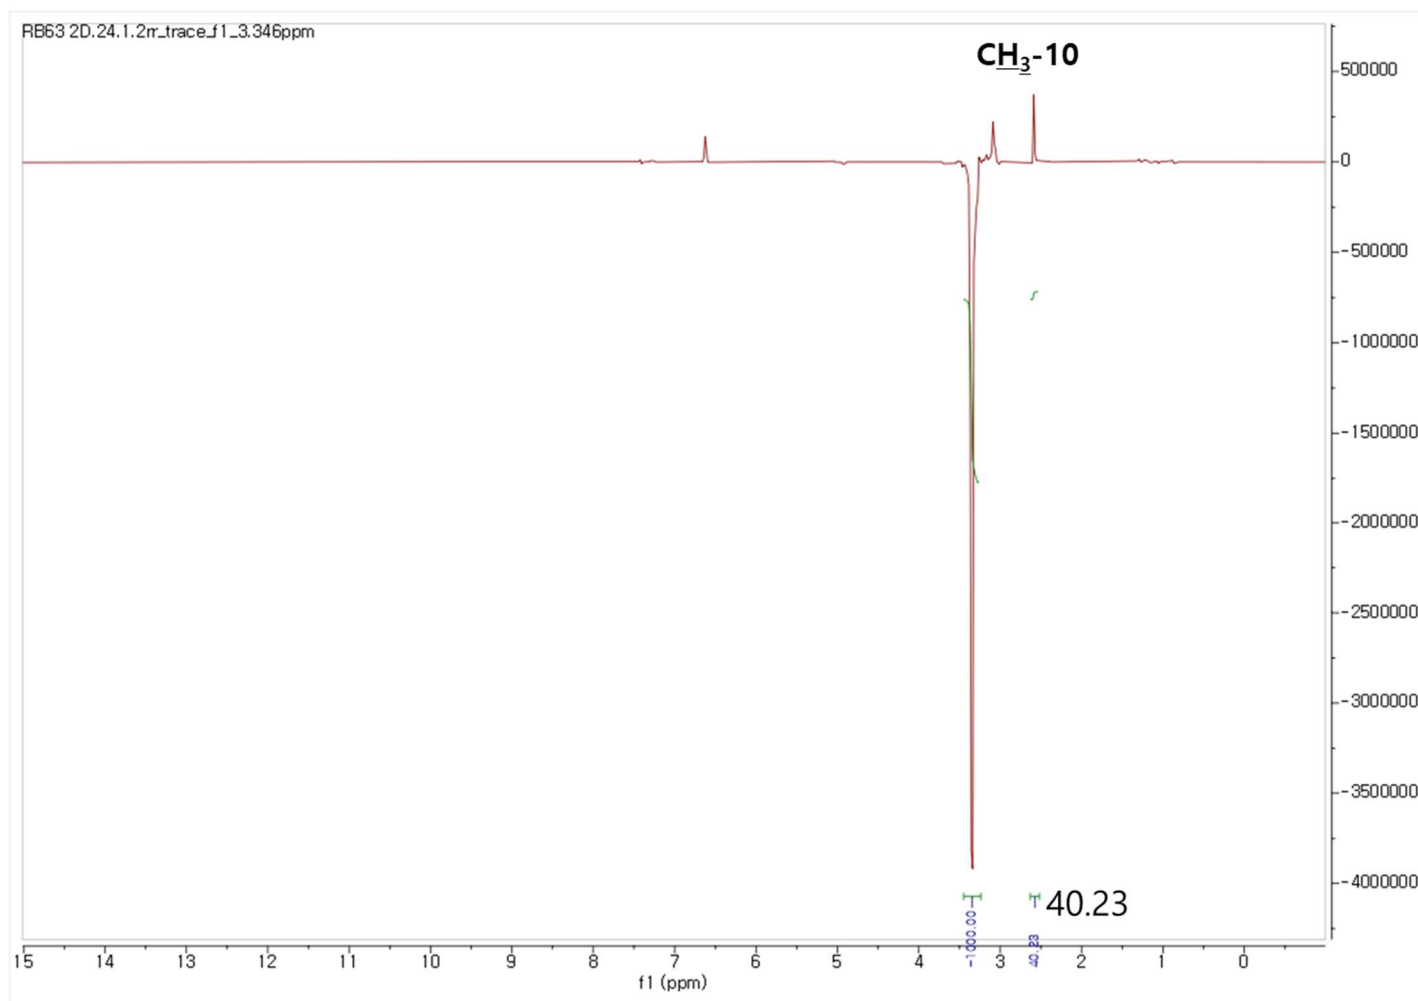

**Figure S17.** Slice of 2D NOESY spectrum with H-12 in **1b** irradiated for PANIC

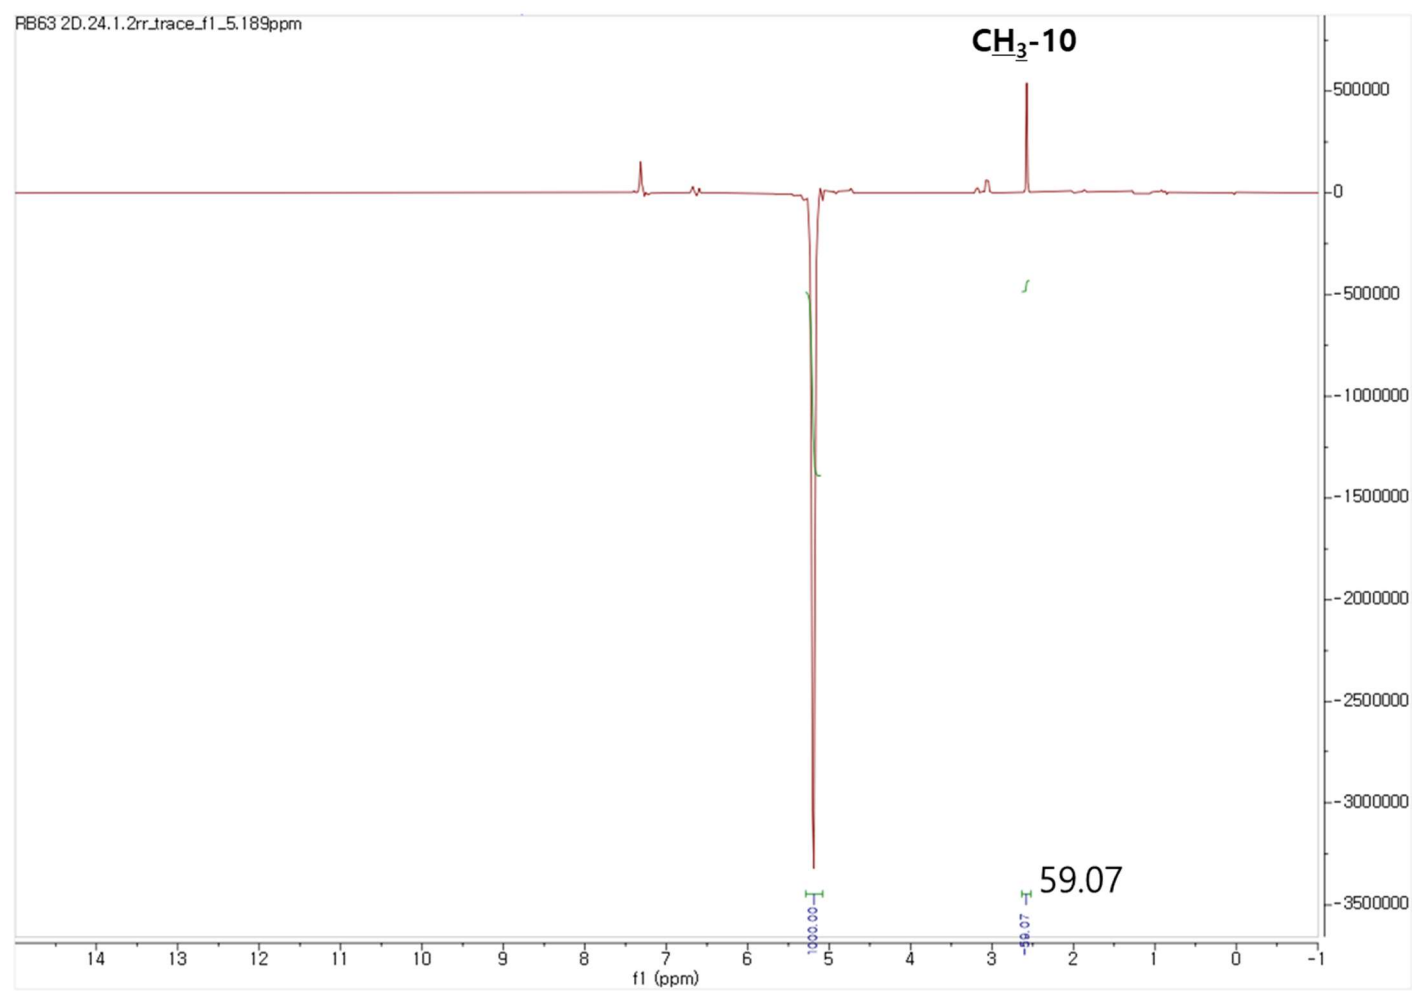

**Figure S18.** HR-FABMS data of **3**

[ Mass Spectrum ]

Data : FAB-A375 Date : 02-Jun-2020 14:37

RT : 1.99 min Scan# : (48,53)

Elements : C 100/0, H 100/0, O 10/0

Mass Tolerance : 1000ppm, 5mmu if m/z < 5, 10mmu if m/z > 10

Unsaturation (U.S.) : 0.0 - 20.0

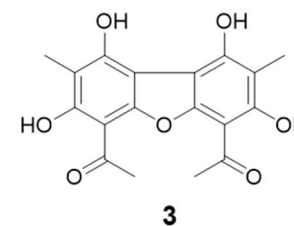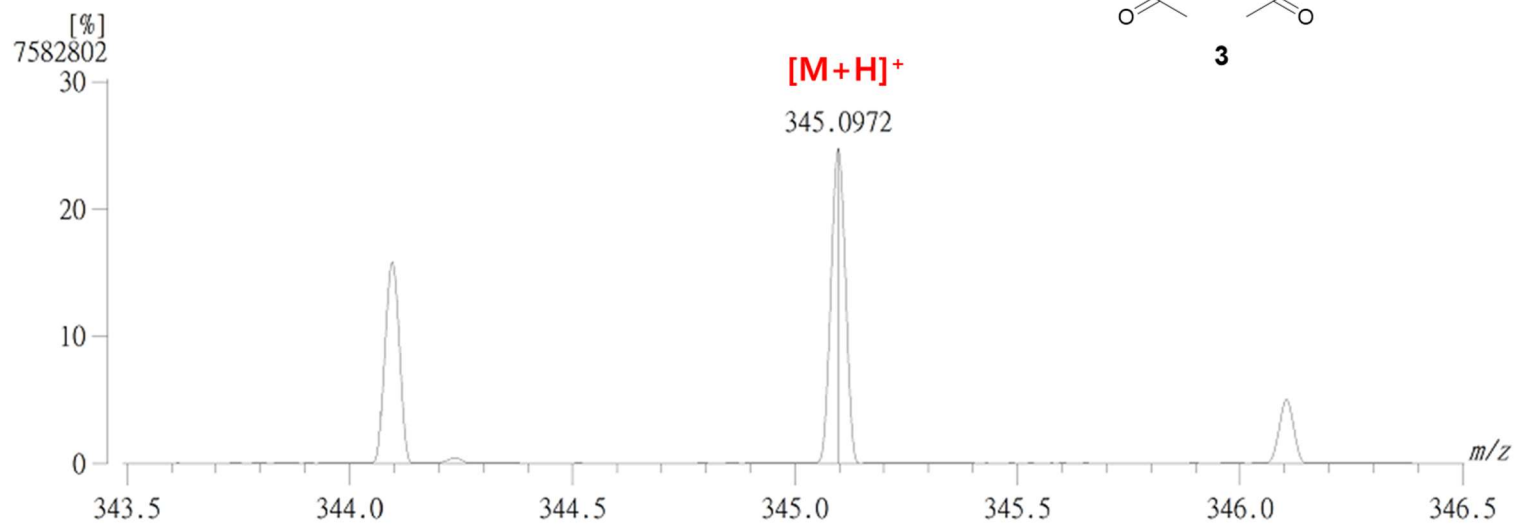

|   | Observed m/z | Int%  | Err[ppm / mmu] | U.S. | Composition |
|---|--------------|-------|----------------|------|-------------|
| 1 | 345.0972     | 24.81 | +16.4 / +5.6   | 19.5 | C25 H13 O2  |
| 2 |              |       | -0.7 / -0.2    | 10.5 | C18 H17 O7  |

**Figure S19.** UV spectrum of **3**

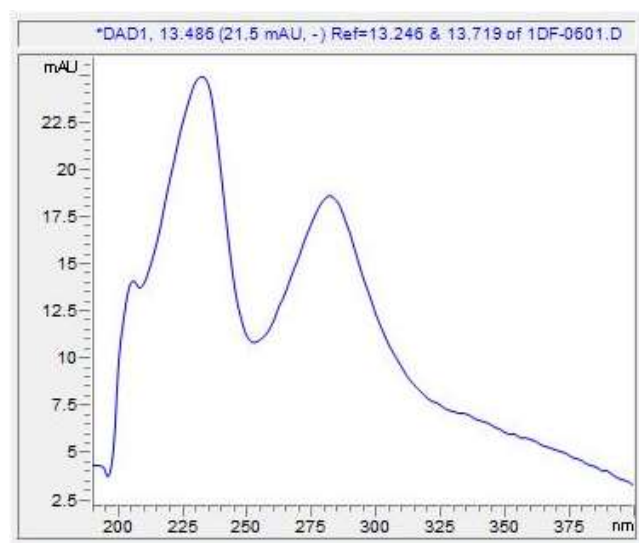

**Figure S20.** IR spectrum of **3**

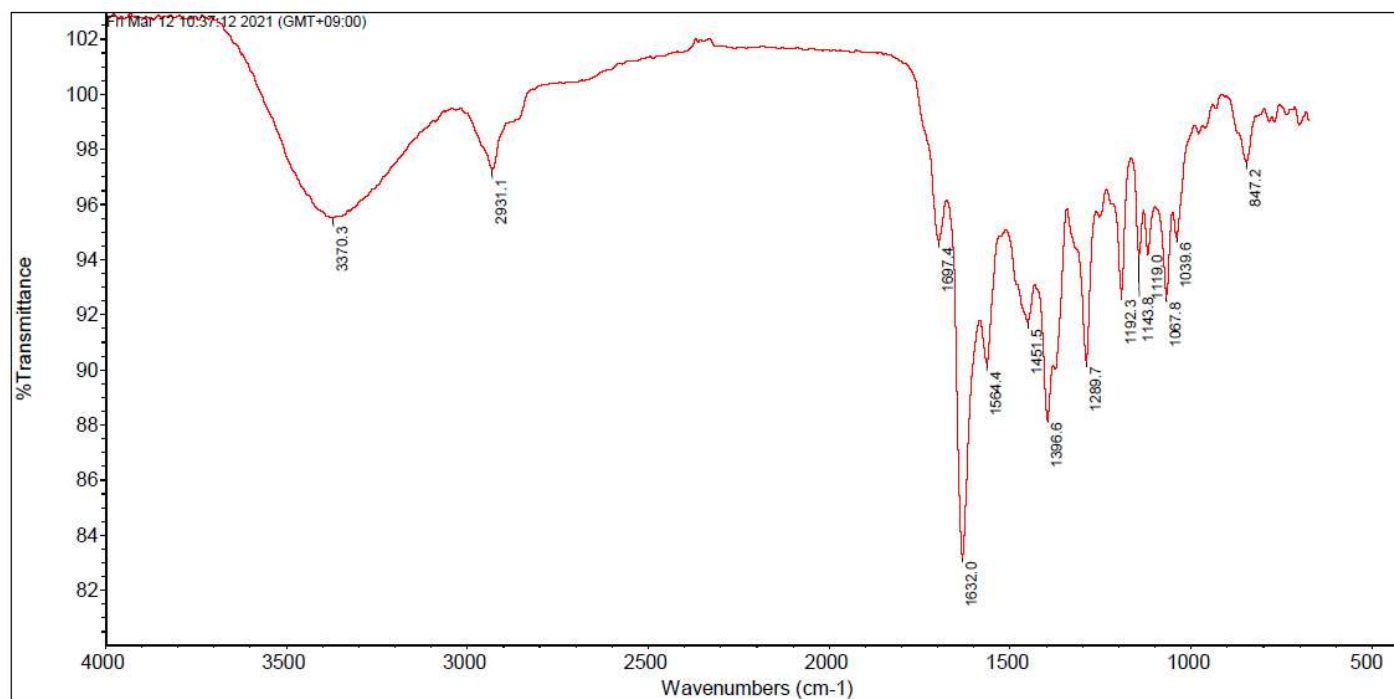

Fri Mar 12 10:38:22 2021 (GMT+09:00)

FIND PEAKS:

Spectrum: Fri Mar 12 10:37:12 2021 (GMT+09:00)

Region: 4000.0 400.0

Absolute threshold: 98.502

Sensitivity: 59

Peak list:

| Position: | Intensity: |
|-----------|------------|
| 847.2     | 97.553     |
| 1039.6    | 94.746     |
| 1067.8    | 92.594     |
| 1119.0    | 94.185     |
| 1143.8    | 94.040     |
| 1192.3    | 92.614     |
| 1289.7    | 90.212     |
| 1396.6    | 88.162     |

RBP\_2D  
RBP

Chemical structure of compound **3** is shown above the spectrum. The structure is a dimeric flavonoid with two chromane units linked at the 5-position. The structure is labeled with atoms 1, 2, 3, 4, 5, 6, 7, 8, 9, 1a, 2a, 3a, 4a, 5a, 6a, 7a, 8a, 9a, 1', 2', 3', 4', 5', 6', 7', 8', 9', 1'', 2'', 3'', 4'', 5'', 6'', 7'', 8'', 9''.

The spectrum shows the following peaks (f1 (ppm) vs. intensity):

- 13.37 (s, 1H): 3-OH/7-OH
- 2.66 (s, 2H): H<sub>3</sub>-2'/H<sub>3</sub>-2''
- 1.99 (s, 2H): 2-CH<sub>3</sub>/8-CH<sub>3</sub>

The spectrum is a 2D plot with f1 (ppm) on the x-axis (0.5 to 13.5) and intensity on the y-axis (0 to 6E+08). The spectrum shows several peaks, with the most prominent ones at 13.37, 2.66, and 1.99 ppm. The peak at 13.37 ppm is labeled "3-OH/7-OH". The peak at 2.66 ppm is labeled "H<sub>3</sub>-2'/H<sub>3</sub>-2''". The peak at 1.99 ppm is labeled "2-CH<sub>3</sub>/8-CH<sub>3</sub>".



**Figure S22.**  $^{13}\text{C}$  NMR spectrum of **3** (DMSO- $d_6$ , 150 MHz)

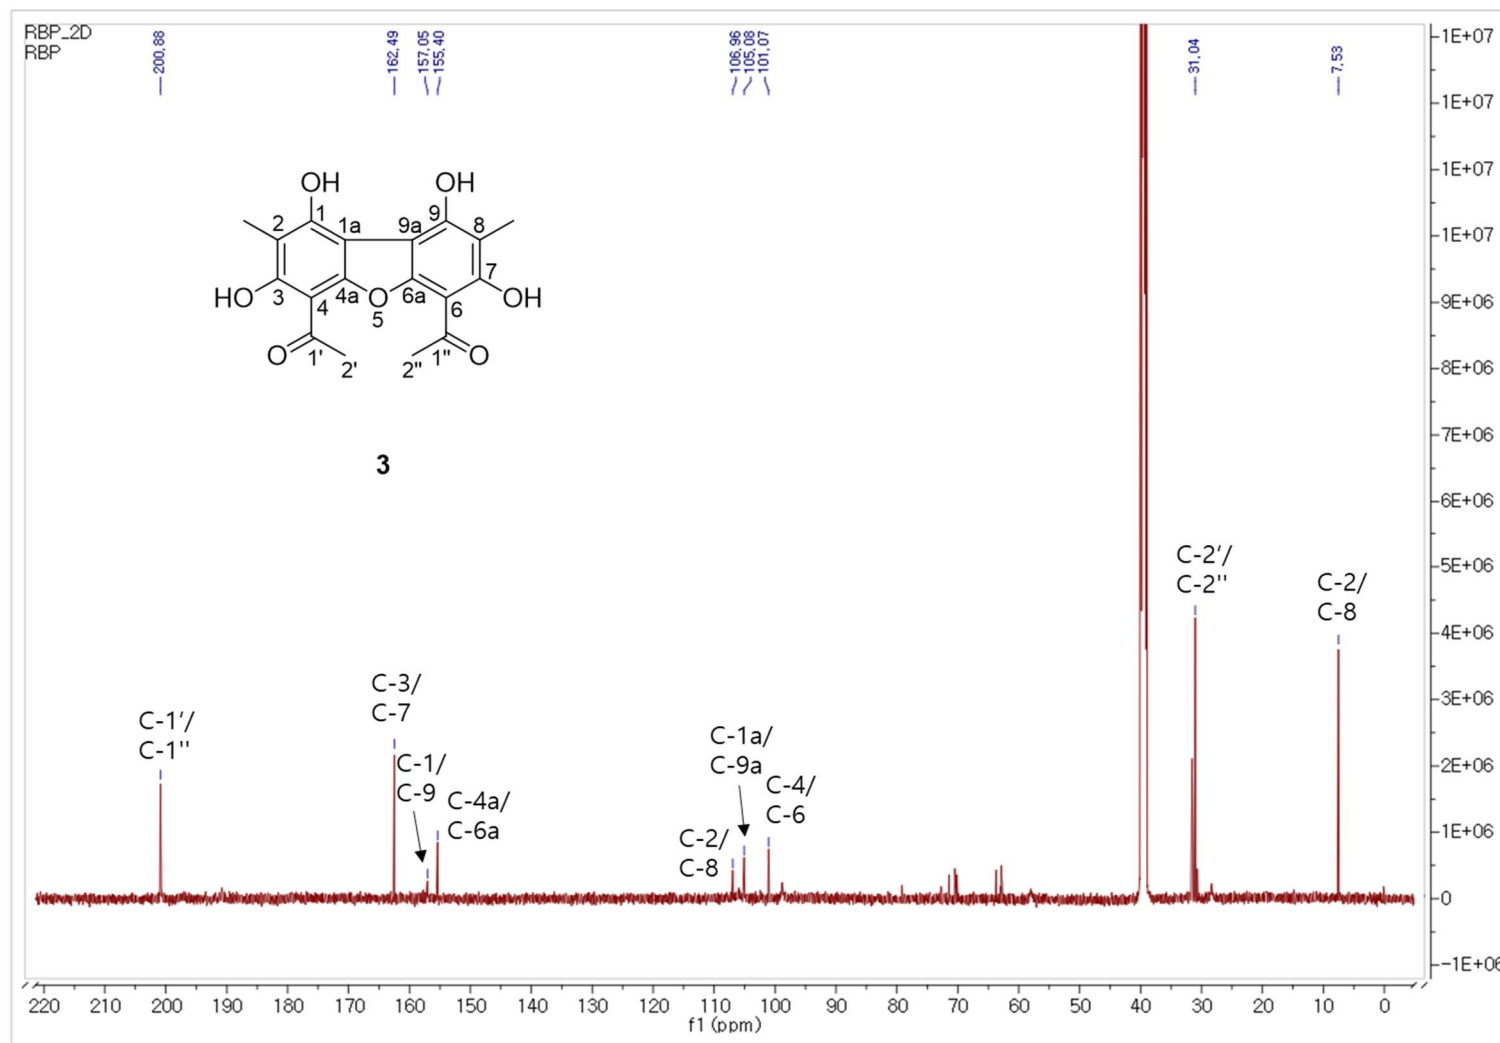

**Figure S23.** NOESY spectrum of **3** (DMSO- $d_6$ )

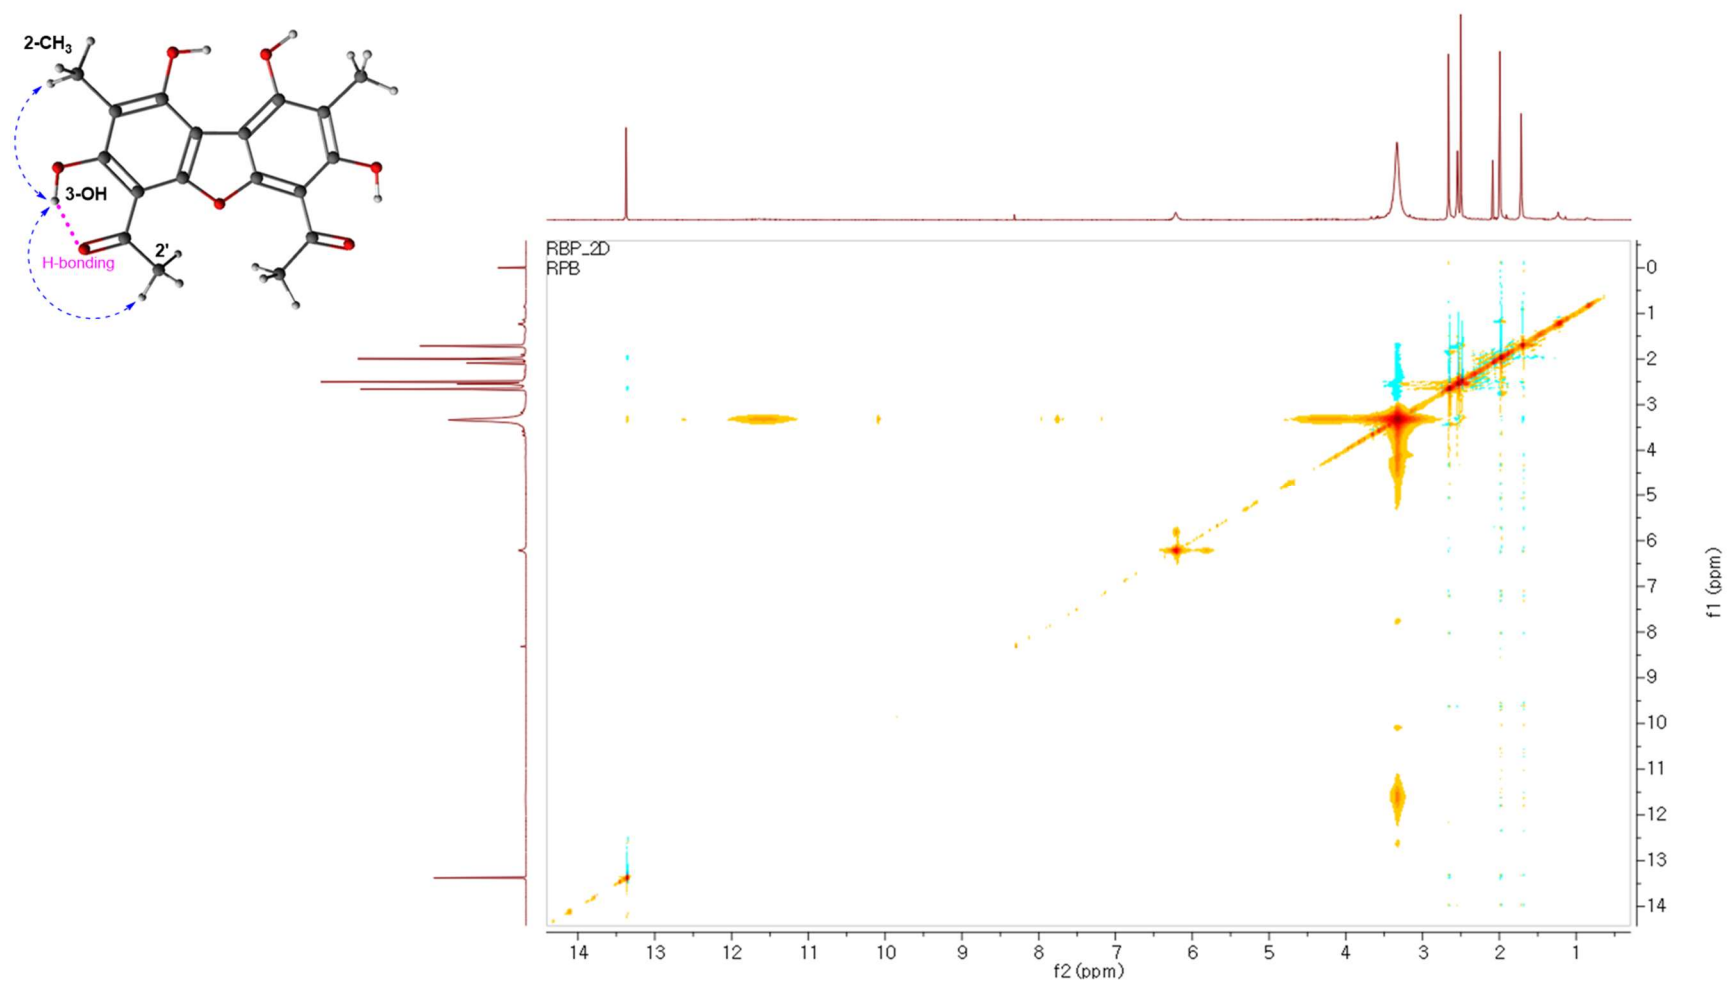

**Figure S24.** HSQC spectrum of **3** (DMSO-*d*<sub>6</sub>)

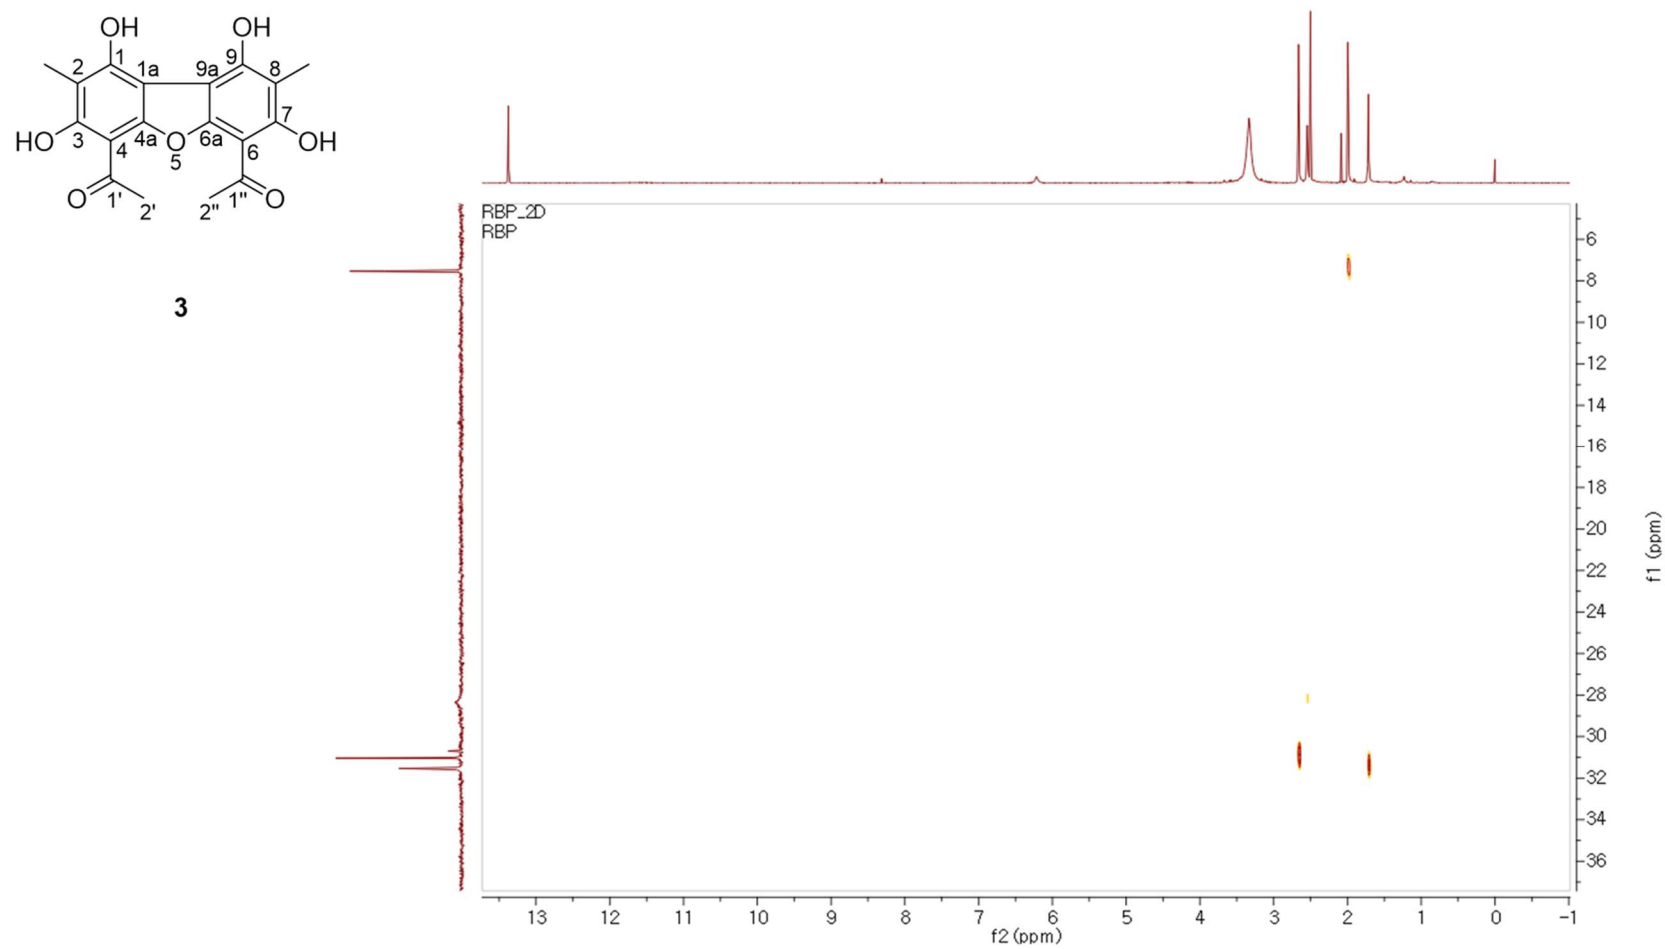

**Figure S25.** HMBC spectrum of **3** (DMSO-*d*<sub>6</sub>)

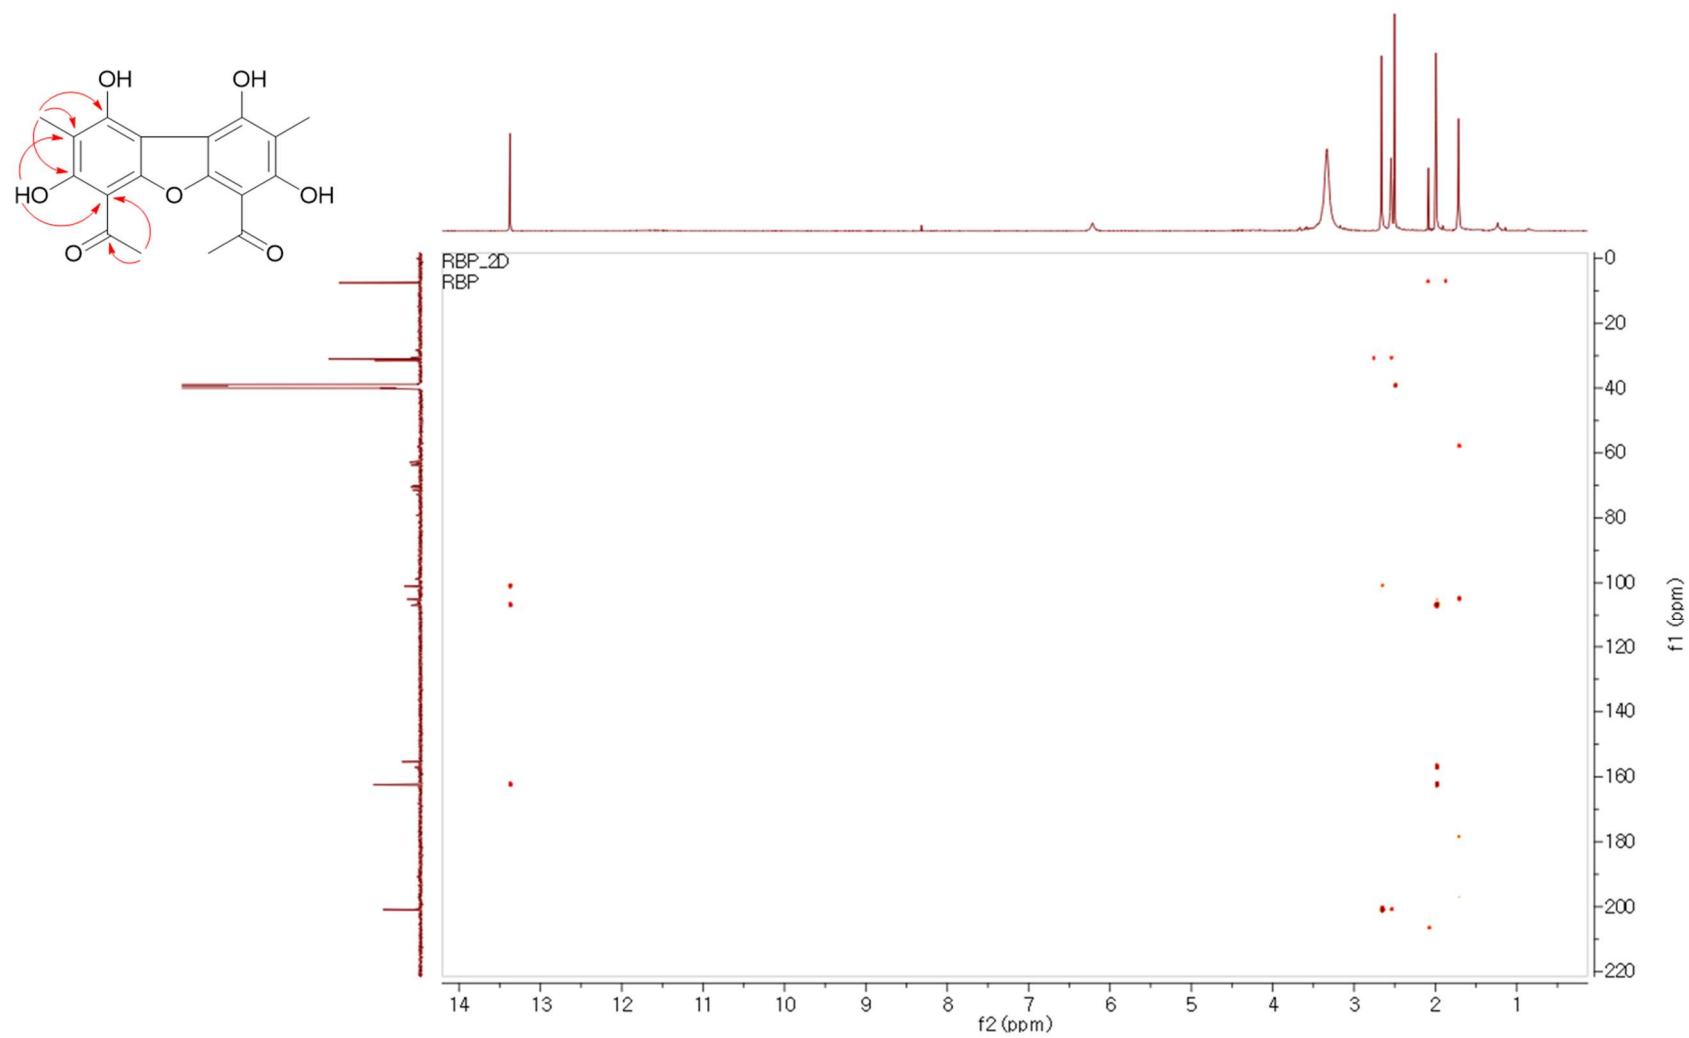

**Table S1.** IC<sub>50</sub> values of compounds **1-3** against *E. coli*

| Compounds | IC <sub>50</sub> (ug/mL) |
|-----------|--------------------------|
| Apramycin | 2.19                     |
| <b>1</b>  | 30.06                    |
| <b>2</b>  | 28.44                    |
| <b>3</b>  | 18.34                    |

Apramycin was used as positive control.

**Table S2.** Cytotoxicity of compounds **1** and **2** against HCT116 cells

| Compounds | IC <sub>50</sub> (μM) <sup>a</sup> |
|-----------|------------------------------------|
| <b>1</b>  | 25.85 ± 3.32                       |
| <b>2</b>  | 20.72 ± 1.20                       |

<sup>a</sup>IC<sub>50</sub> value of each compound was defined as the concentration (μM) that caused 50% inhibition of NO production in LPS-activated RAW264.7 mouse macrophages. The results are the averages of three independent experiments, and the data are expressed as mean ± SD.

**Table S3.** NO inhibition of compounds **1** and **2** against LPS-induced RAW264.7 cells

| Compounds | IC <sub>50</sub> (μM) <sup>a</sup> |
|-----------|------------------------------------|
| <b>1</b>  | 7.0 ± 0.004                        |
| <b>2</b>  | 5.5 ± 0.006                        |

<sup>a</sup>IC<sub>50</sub> value of each compound was defined as the concentration (μM) that caused 50% inhibition of NO production in LPS-activated RAW264.7 mouse macrophages. The results are the averages of three independent experiments, and the data are expressed as mean ± SD.

**Table S4.** Gibbs free energies and Boltzmann distribution of conformer **1a**

| Conformers  | B3LYP/6-31+G(d,p) Gibbs free energy (298.15 K) |                       |                           |
|-------------|------------------------------------------------|-----------------------|---------------------------|
|             | G (Hartree)                                    | $\Delta G$ (kcal/mol) | Boltzmann distribution(%) |
| <b>1a-1</b> | -1690.059209                                   | 0.00                  | 78.5%                     |
| <b>1a-3</b> | -1690.057693                                   | 0.95                  | 15.7%                     |
| <b>1a-2</b> | -1690.056746                                   | 1.55                  | 5.8%                      |

**Table S5.** Gibbs free energies and Boltzmann distribution of conformer **1b**

| Conformers   | B3LYP/6-31+G(d,p) Gibbs free energy (298.15 K) |                       |                           |
|--------------|------------------------------------------------|-----------------------|---------------------------|
|              | G (Hartree)                                    | $\Delta G$ (kcal/mol) | Boltzmann distribution(%) |
| <b>1b-2</b>  | -1690.060353                                   | -0.89                 | 32.1%                     |
| <b>1b-11</b> | -1690.059722                                   | -0.49                 | 16.4%                     |
| <b>1b-10</b> | -1690.059066                                   | -0.08                 | 8.2%                      |
| <b>1b-6</b>  | -1690.059027                                   | -0.05                 | 7.9%                      |
| <b>1b-12</b> | -1690.059033                                   | -0.06                 | 7.9%                      |
| <b>1b-8</b>  | -1690.059017                                   | -0.05                 | 7.8%                      |
| <b>1b-1</b>  | -1690.058941                                   | 0.00                  | 7.2%                      |
| <b>1b-5</b>  | -1690.058296                                   | 0.40                  | 3.6%                      |
| <b>1b-13</b> | -1690.057805                                   | 0.71                  | 2.2%                      |
| <b>1b-3</b>  | -1690.05763                                    | 0.82                  | 1.8%                      |
| <b>1b-7</b>  | -1690.057629                                   | 0.82                  | 1.8%                      |
| <b>1b-4</b>  | -1690.057569                                   | 0.86                  | 1.7%                      |
| <b>1b-9</b>  | -1690.056402                                   | 1.59                  | 0.5%                      |
| <b>1b-14</b> | -1690.05703                                    | 1.20                  | 0.9%                      |



## Coordinates of the conformers

### 1a-1

| Center<br>Number | Coordinates (Angstroms) |             |              | Atom | Atomic<br>Number | Atomic<br>Type |
|------------------|-------------------------|-------------|--------------|------|------------------|----------------|
|                  | X                       | Y           | Z            |      |                  |                |
| 1                | 2.23594536              | 3.65872422  | -7.95092901  | o    | 8                | 0              |
| 2                | 4.50170026              | 4.14706152  | -8.15217258  | c    | 6                | 0              |
| 3                | 5.31461643              | 6.56526691  | -8.56158754  | n    | 7                | 0              |
| 4                | 7.95187274              | 7.38060085  | -8.70317217  | c    | 6                | 0              |
| 5                | 3.40680525              | 8.58409097  | -8.39199216  | c    | 6                | 0              |
| 6                | 1.52545907              | 8.70376266  | -10.61654914 | c    | 6                | 0              |
| 7                | 2.68438724              | 9.31430102  | -13.16204582 | c    | 6                | 0              |
| 8                | 2.28722936              | 7.70719253  | -15.2288718  | c    | 6                | 0              |
| 9                | 3.24946253              | 8.28996326  | -17.6185812  | c    | 6                | 0              |
| 10               | 4.64532899              | 10.49855463 | -17.98067915 | c    | 6                | 0              |
| 11               | 5.05223731              | 12.12402329 | -15.93995263 | c    | 6                | 0              |
| 12               | 4.07182778              | 11.5401337  | -13.56285645 | c    | 6                | 0              |
| 13               | 1.96540054              | 8.54217752  | -5.8585993   | c    | 6                | 0              |
| 14               | 3.46735573              | 7.80748379  | -3.93265042  | o    | 8                | 0              |
| 15               | 2.32836384              | 7.60209438  | -1.41187906  | c    | 6                | 0              |
| 16               | 3.67187857              | 9.47035977  | 0.33703669   | c    | 6                | 0              |
| 17               | 3.30749357              | 12.26992971 | -0.35973115  | c    | 6                | 0              |
| 18               | 0.5833265               | 13.240558   | -0.10308026  | c    | 6                | 0              |
| 19               | 0.29662985              | 16.1036113  | -0.52116037  | c    | 6                | 0              |
| 20               | 0.8936889               | 16.98097347 | -3.21928864  | c    | 6                | 0              |
| 21               | 2.43543076              | 4.77852084  | -0.63123001  | c    | 6                | 0              |

|    |             |             |              |   |   |   |
|----|-------------|-------------|--------------|---|---|---|
| 22 | 0.71659007  | 4.23315009  | 1.64410359   | c | 6 | 0 |
| 23 | 5.14741994  | 3.91738298  | -0.05665413  | c | 6 | 0 |
| 24 | 6.72272499  | 2.79025173  | -2.22496393  | c | 6 | 0 |
| 25 | 9.32211586  | 1.88274514  | -1.30312739  | c | 6 | 0 |
| 26 | 6.07044268  | 4.22121264  | 2.02593752   | o | 8 | 0 |
| 27 | -0.19314175 | 9.26875391  | -5.63267203  | o | 8 | 0 |
| 28 | 6.43056944  | 1.95074326  | -7.84089351  | c | 6 | 0 |
| 29 | 6.81933438  | 0.47990068  | -10.35394508 | c | 6 | 0 |
| 30 | 8.59074745  | 1.744401    | -12.20956756 | c | 6 | 0 |
| 31 | 11.21211166 | 1.40652744  | -11.98142196 | c | 6 | 0 |
| 32 | 12.87937328 | 2.60729046  | -13.63434745 | c | 6 | 0 |
| 33 | 11.94721335 | 4.16911795  | -15.54812679 | c | 6 | 0 |
| 34 | 9.34381095  | 4.51050382  | -15.8012062  | c | 6 | 0 |
| 35 | 7.68105839  | 3.29933566  | -14.14813639 | c | 6 | 0 |
| 36 | 5.47650684  | 0.180326    | -5.95580068  | n | 7 | 0 |
| 37 | 5.25075791  | 0.5937721   | -3.40141568  | c | 6 | 0 |
| 38 | 3.99905852  | -0.82904987 | -2.06816108  | o | 8 | 0 |
| 39 | 4.4825435   | 10.35583442 | -8.3474059   | h | 1 | 0 |
| 40 | 0.33785765  | 8.10341436  | -1.61531458  | h | 1 | 0 |
| 41 | 1.72458332  | 3.72883761  | -2.26412894  | h | 1 | 0 |
| 42 | 6.94998702  | 4.32976449  | -3.59416588  | h | 1 | 0 |
| 43 | 8.26604574  | 2.63540178  | -7.1955143   | h | 1 | 0 |
| 44 | 9.19167093  | 5.81266405  | -9.18095684  | h | 1 | 0 |
| 45 | 8.14853613  | 8.77851693  | -10.2122459  | h | 1 | 0 |
| 46 | 8.56900406  | 8.22973426  | -6.91301164  | h | 1 | 0 |
| 47 | 0.12709201  | 10.14493023 | -10.1159038  | h | 1 | 0 |

|    |             |             |              |   |   |   |
|----|-------------|-------------|--------------|---|---|---|
| 48 | 0.51500957  | 6.90776613  | -10.69420794 | h | 1 | 0 |
| 49 | 1.18137198  | 5.99454385  | -14.96588069 | h | 1 | 0 |
| 50 | 2.89633604  | 7.0224628   | -19.19585904 | h | 1 | 0 |
| 51 | 5.39121931  | 10.96176864 | -19.83663745 | h | 1 | 0 |
| 52 | 6.1150796   | 13.8613023  | -16.20492438 | h | 1 | 0 |
| 53 | 4.3659463   | 12.85523304 | -12.00933099 | h | 1 | 0 |
| 54 | 2.98056916  | 9.14037654  | 2.26299295   | h | 1 | 0 |
| 55 | 5.6932443   | 9.0246683   | 0.37686588   | h | 1 | 0 |
| 56 | 3.99839348  | 12.58189849 | -2.28976086  | h | 1 | 0 |
| 57 | 4.54027168  | 13.39671161 | 0.87364749   | h | 1 | 0 |
| 58 | -0.11263196 | 12.77091756 | 1.79723382   | h | 1 | 0 |
| 59 | -0.64614451 | 12.24724451 | -1.44539787  | h | 1 | 0 |
| 60 | 1.50854593  | 17.12252598 | 0.82384584   | h | 1 | 0 |
| 61 | -1.6515386  | 16.64301316 | -0.057441    | h | 1 | 0 |
| 62 | 0.51343809  | 19.00306187 | -3.4479206   | h | 1 | 0 |
| 63 | 2.88073364  | 16.66899689 | -3.70948812  | h | 1 | 0 |
| 64 | -0.26203463 | 15.95916268 | -4.60234426  | h | 1 | 0 |
| 65 | 1.46584094  | 5.08469252  | 3.36880963   | h | 1 | 0 |
| 66 | 0.59967013  | 2.19254825  | 1.94592866   | h | 1 | 0 |
| 67 | -1.19507071 | 4.94959855  | 1.30742639   | h | 1 | 0 |
| 68 | 10.47839016 | 1.21732228  | -2.88439675  | h | 1 | 0 |
| 69 | 10.31607495 | 3.41247202  | -0.33839289  | h | 1 | 0 |
| 70 | 9.0887382   | 0.33084245  | 0.0390177    | h | 1 | 0 |
| 71 | 7.57990837  | -1.37386535 | -9.83270939  | h | 1 | 0 |
| 72 | 4.95995291  | 0.1629243   | -11.21160702 | h | 1 | 0 |
| 73 | 11.94899249 | 0.17961338  | -10.50474933 | h | 1 | 0 |

| 74               | 14.90210313             | 2.31460624  | -13.43536926 | h    | 1                | 0              |
|------------------|-------------------------|-------------|--------------|------|------------------|----------------|
| 75               | 13.24209194             | 5.10560022  | -16.83720137 | h    | 1                | 0              |
| 76               | 8.59414522              | 5.72763521  | -17.27403678 | h    | 1                | 0              |
| 77               | 5.65997374              | 3.58602675  | -14.35990869 | h    | 1                | 0              |
| 78               | 4.18423731              | -1.08889639 | -6.5810889   | h    | 1                | 0              |
| <b>1a-2</b>      |                         |             |              |      |                  |                |
| Center<br>Number | Coordinates (Angstroms) |             |              | Atom | Atomic<br>Number | Atomic<br>Type |
|                  | X                       | Y           | Z            |      |                  |                |
| 1                | 3.60752337              | 2.5650867   | -8.32691019  | o    | 8                | 0              |
| 2                | 5.76908323              | 3.39193545  | -8.09869767  | c    | 6                | 0              |
| 3                | 6.32445871              | 5.84892776  | -8.661493    | n    | 7                | 0              |
| 4                | 8.82555359              | 7.01434021  | -8.64994345  | c    | 6                | 0              |
| 5                | 4.20645074              | 7.50257454  | -9.39398628  | c    | 6                | 0              |
| 6                | 3.27676582              | 7.04589867  | -12.13600201 | c    | 6                | 0              |
| 7                | 2.28528919              | 9.39873733  | -13.44083533 | c    | 6                | 0              |
| 8                | 3.92882191              | 10.9109928  | -14.86937541 | c    | 6                | 0              |
| 9                | 3.06823908              | 13.08991005 | -16.08132939 | c    | 6                | 0              |
| 10               | 0.53239205              | 13.79121079 | -15.88621328 | c    | 6                | 0              |
| 11               | -1.12370632             | 12.29992181 | -14.47281681 | c    | 6                | 0              |
| 12               | -0.25737533             | 10.12356109 | -13.25931053 | c    | 6                | 0              |
| 13               | 2.03984388              | 7.37316022  | -7.45722917  | c    | 6                | 0              |
| 14               | 2.95927153              | 7.50436571  | -5.07784126  | o    | 8                | 0              |
| 15               | 1.17307204              | 7.2491724   | -2.97749744  | c    | 6                | 0              |
| 16               | 1.33855122              | 9.63308018  | -1.35759515  | c    | 6                | 0              |
| 17               | 0.48563153              | 12.02844513 | -2.75710985  | c    | 6                | 0              |
| 18               | 0.33652976              | 14.39178401 | -1.06943172  | c    | 6                | 0              |

|    |             |             |              |   |   |   |
|----|-------------|-------------|--------------|---|---|---|
| 19 | 2.84358348  | 15.27306912 | 0.11484823   | c | 6 | 0 |
| 20 | 4.86281609  | 16.05735472 | -1.81113567  | c | 6 | 0 |
| 21 | 1.77548022  | 4.70644355  | -1.65336208  | c | 6 | 0 |
| 22 | -0.25606073 | 3.98572332  | 0.29176707   | c | 6 | 0 |
| 23 | 4.3887424   | 4.75416611  | -0.39009519  | c | 6 | 0 |
| 24 | 6.64690418  | 3.6470352   | -1.85103983  | c | 6 | 0 |
| 25 | 9.06710891  | 3.65072165  | -0.24687229  | c | 6 | 0 |
| 26 | 4.69196468  | 5.733999    | 1.66682889   | o | 8 | 0 |
| 27 | -0.17985309 | 7.32672229  | -8.00005502  | o | 8 | 0 |
| 28 | 7.84948171  | 1.60912865  | -7.05438437  | c | 6 | 0 |
| 29 | 8.73018397  | -0.25885601 | -9.13333006  | c | 6 | 0 |
| 30 | 10.07326863 | 0.96105671  | -11.34356052 | c | 6 | 0 |
| 31 | 8.74172455  | 1.65908791  | -13.52538774 | c | 6 | 0 |
| 32 | 9.97793442  | 2.82378787  | -15.54524019 | c | 6 | 0 |
| 33 | 12.56961866 | 3.3047954   | -15.41413992 | c | 6 | 0 |
| 34 | 13.92007344 | 2.60281248  | -13.25790088 | c | 6 | 0 |
| 35 | 12.67931537 | 1.43649936  | -11.24282662 | c | 6 | 0 |
| 36 | 6.84367975  | 0.1094793   | -4.97141167  | n | 7 | 0 |
| 37 | 5.99222366  | 0.9516258   | -2.66742804  | c | 6 | 0 |
| 38 | 4.82223726  | -0.45716608 | -1.24683125  | o | 8 | 0 |
| 39 | 4.94356747  | 9.43423228  | -9.26183172  | h | 1 | 0 |
| 40 | -0.71336137 | 7.09076287  | -3.80577206  | h | 1 | 0 |
| 41 | 1.77791524  | 3.29256379  | -3.16318261  | h | 1 | 0 |
| 42 | 6.88476034  | 4.87450967  | -3.50357807  | h | 1 | 0 |
| 43 | 9.48443361  | 2.66430229  | -6.36519167  | h | 1 | 0 |
| 44 | 10.31393205 | 5.5974712   | -8.6102234   | h | 1 | 0 |

|    |             |             |              |   |   |   |
|----|-------------|-------------|--------------|---|---|---|
| 45 | 9.0855121   | 8.09986064  | -10.39227676 | h | 1 | 0 |
| 46 | 9.0485519   | 8.29786754  | -7.03641879  | h | 1 | 0 |
| 47 | 1.84822722  | 5.55751397  | -12.09213721 | h | 1 | 0 |
| 48 | 4.89704654  | 6.32099597  | -13.20070686 | h | 1 | 0 |
| 49 | 5.90336151  | 10.36275462 | -15.05326829 | h | 1 | 0 |
| 50 | 4.37207817  | 14.22844029 | -17.18702879 | h | 1 | 0 |
| 51 | -0.14844563 | 15.48128904 | -16.83331358 | h | 1 | 0 |
| 52 | -3.10198248 | 12.82911159 | -14.31529892 | h | 1 | 0 |
| 53 | -1.53901049 | 8.98203412  | -12.13819755 | h | 1 | 0 |
| 54 | 0.13874555  | 9.34596763  | 0.30895715   | h | 1 | 0 |
| 55 | 3.26821295  | 9.84488925  | -0.64225912  | h | 1 | 0 |
| 56 | -1.38612464 | 11.69637955 | -3.58947873  | h | 1 | 0 |
| 57 | 1.7590306   | 12.38201188 | -4.35414044  | h | 1 | 0 |
| 58 | -1.03005716 | 14.03765087 | 0.45338872   | h | 1 | 0 |
| 59 | -0.45012944 | 15.95105523 | -2.19331775  | h | 1 | 0 |
| 60 | 3.60347431  | 13.78858035 | 1.348532     | h | 1 | 0 |
| 61 | 2.43944483  | 16.88311051 | 1.35860984   | h | 1 | 0 |
| 62 | 6.55173807  | 16.78746533 | -0.86278796  | h | 1 | 0 |
| 63 | 5.45739527  | 14.46835035 | -2.99694731  | h | 1 | 0 |
| 64 | 4.15741544  | 17.54458177 | -3.07073882  | h | 1 | 0 |
| 65 | -0.17949523 | 5.22366003  | 1.94227887   | h | 1 | 0 |
| 66 | 0.06324163  | 2.04776299  | 0.93320467   | h | 1 | 0 |
| 67 | -2.14450078 | 4.08992914  | -0.54772322  | h | 1 | 0 |
| 68 | 10.68787392 | 2.98698957  | -1.34854298  | h | 1 | 0 |
| 69 | 9.46131715  | 5.55232841  | 0.45131904   | h | 1 | 0 |
| 70 | 8.83066202  | 2.41015803  | 1.38704941   | h | 1 | 0 |

|    |             |             |              |   |   |   |
|----|-------------|-------------|--------------|---|---|---|
| 71 | 9.97238718  | -1.64228523 | -8.22149725  | h | 1 | 0 |
| 72 | 7.04878927  | -1.27088485 | -9.79756169  | h | 1 | 0 |
| 73 | 6.72658576  | 1.27630041  | -13.64239524 | h | 1 | 0 |
| 74 | 8.9184526   | 3.33913658  | -17.227122   | h | 1 | 0 |
| 75 | 13.53377577 | 4.20263845  | -16.98861873 | h | 1 | 0 |
| 76 | 15.9414264  | 2.94736627  | -13.15058071 | h | 1 | 0 |
| 77 | 13.74792978 | 0.86988965  | -9.57961086  | h | 1 | 0 |
| 78 | 6.07586433  | -1.58215808 | -5.43725497  | h | 1 | 0 |

**1a-3**

| Center<br>Number | Coordinates (Angstroms) |             |              | Atom | Atomic<br>Number | Atomic<br>Type |
|------------------|-------------------------|-------------|--------------|------|------------------|----------------|
|                  | X                       | Y           | Z            |      |                  |                |
| 1                | 2.23594536              | 3.65872422  | -7.95092901  | o    | 8                | 0              |
| 2                | 4.50170026              | 4.14706152  | -8.15217258  | c    | 6                | 0              |
| 3                | 5.31461643              | 6.56526691  | -8.56158754  | n    | 7                | 0              |
| 4                | 7.95187274              | 7.38060085  | -8.70317217  | c    | 6                | 0              |
| 5                | 3.40680525              | 8.58409097  | -8.39199216  | c    | 6                | 0              |
| 6                | 1.52545907              | 8.70376266  | -10.61654914 | c    | 6                | 0              |
| 7                | 2.68438724              | 9.31430102  | -13.16204582 | c    | 6                | 0              |
| 8                | 2.28722936              | 7.70719253  | -15.2288718  | c    | 6                | 0              |
| 9                | 3.24946253              | 8.28996326  | -17.6185812  | c    | 6                | 0              |
| 10               | 4.64532899              | 10.49855463 | -17.98067915 | c    | 6                | 0              |
| 11               | 5.05223731              | 12.12402329 | -15.93995263 | c    | 6                | 0              |
| 12               | 4.07182778              | 11.5401337  | -13.56285645 | c    | 6                | 0              |
| 13               | 1.96540054              | 8.54217752  | -5.8585993   | c    | 6                | 0              |
| 14               | 3.46735573              | 7.80748379  | -3.93265042  | o    | 8                | 0              |
| 15               | 2.32836384              | 7.60209438  | -1.41187906  | c    | 6                | 0              |

|    |             |             |              |   |   |   |
|----|-------------|-------------|--------------|---|---|---|
| 16 | 3.67187857  | 9.47035977  | 0.33703669   | c | 6 | 0 |
| 17 | 3.30749357  | 12.26992971 | -0.35973115  | c | 6 | 0 |
| 18 | 0.5833265   | 13.240558   | -0.10308026  | c | 6 | 0 |
| 19 | 0.29662985  | 16.1036113  | -0.52116037  | c | 6 | 0 |
| 20 | 0.8936889   | 16.98097347 | -3.21928864  | c | 6 | 0 |
| 21 | 2.43543076  | 4.77852084  | -0.63123001  | c | 6 | 0 |
| 22 | 0.71659007  | 4.23315009  | 1.64410359   | c | 6 | 0 |
| 23 | 5.14741994  | 3.91738298  | -0.05665413  | c | 6 | 0 |
| 24 | 6.72272499  | 2.79025173  | -2.22496393  | c | 6 | 0 |
| 25 | 9.32211586  | 1.88274514  | -1.30312739  | c | 6 | 0 |
| 26 | 6.07044268  | 4.22121264  | 2.02593752   | o | 8 | 0 |
| 27 | -0.19314175 | 9.26875391  | -5.63267203  | o | 8 | 0 |
| 28 | 6.43056944  | 1.95074326  | -7.84089351  | c | 6 | 0 |
| 29 | 6.81933438  | 0.47990068  | -10.35394508 | c | 6 | 0 |
| 30 | 8.59074745  | 1.744401    | -12.20956756 | c | 6 | 0 |
| 31 | 11.21211166 | 1.40652744  | -11.98142196 | c | 6 | 0 |
| 32 | 12.87937328 | 2.60729046  | -13.63434745 | c | 6 | 0 |
| 33 | 11.94721335 | 4.16911795  | -15.54812679 | c | 6 | 0 |
| 34 | 9.34381095  | 4.51050382  | -15.8012062  | c | 6 | 0 |
| 35 | 7.68105839  | 3.29933566  | -14.14813639 | c | 6 | 0 |
| 36 | 5.47650684  | 0.180326    | -5.95580068  | n | 7 | 0 |
| 37 | 5.25075791  | 0.5937721   | -3.40141568  | c | 6 | 0 |
| 38 | 3.99905852  | -0.82904987 | -2.06816108  | o | 8 | 0 |
| 39 | 4.4825435   | 10.35583442 | -8.3474059   | h | 1 | 0 |
| 40 | 0.33785765  | 8.10341436  | -1.61531458  | h | 1 | 0 |
| 41 | 1.72458332  | 3.72883761  | -2.26412894  | h | 1 | 0 |



|    |             |             |              |   |   |   |
|----|-------------|-------------|--------------|---|---|---|
| 42 | 6.94998702  | 4.32976449  | -3.59416588  | h | 1 | 0 |
| 43 | 8.26604574  | 2.63540178  | -7.1955143   | h | 1 | 0 |
| 44 | 9.19167093  | 5.81266405  | -9.18095684  | h | 1 | 0 |
| 45 | 8.14853613  | 8.77851693  | -10.2122459  | h | 1 | 0 |
| 46 | 8.56900406  | 8.22973426  | -6.91301164  | h | 1 | 0 |
| 47 | 0.12709201  | 10.14493023 | -10.1159038  | h | 1 | 0 |
| 48 | 0.51500957  | 6.90776613  | -10.69420794 | h | 1 | 0 |
| 49 | 1.18137198  | 5.99454385  | -14.96588069 | h | 1 | 0 |
| 50 | 2.89633604  | 7.0224628   | -19.19585904 | h | 1 | 0 |
| 51 | 5.39121931  | 10.96176864 | -19.83663745 | h | 1 | 0 |
| 52 | 6.1150796   | 13.8613023  | -16.20492438 | h | 1 | 0 |
| 53 | 4.3659463   | 12.85523304 | -12.00933099 | h | 1 | 0 |
| 54 | 2.98056916  | 9.14037654  | 2.26299295   | h | 1 | 0 |
| 55 | 5.6932443   | 9.0246683   | 0.37686588   | h | 1 | 0 |
| 56 | 3.99839348  | 12.58189849 | -2.28976086  | h | 1 | 0 |
| 57 | 4.54027168  | 13.39671161 | 0.87364749   | h | 1 | 0 |
| 58 | -0.11263196 | 12.77091756 | 1.79723382   | h | 1 | 0 |
| 59 | -0.64614451 | 12.24724451 | -1.44539787  | h | 1 | 0 |
| 60 | 1.50854593  | 17.12252598 | 0.82384584   | h | 1 | 0 |
| 61 | -1.6515386  | 16.64301316 | -0.057441    | h | 1 | 0 |
| 62 | 0.51343809  | 19.00306187 | -3.4479206   | h | 1 | 0 |
| 63 | 2.88073364  | 16.66899689 | -3.70948812  | h | 1 | 0 |
| 64 | -0.26203463 | 15.95916268 | -4.60234426  | h | 1 | 0 |
| 65 | 1.46584094  | 5.08469252  | 3.36880963   | h | 1 | 0 |
| 66 | 0.59967013  | 2.19254825  | 1.94592866   | h | 1 | 0 |
| 67 | -1.19507071 | 4.94959855  | 1.30742639   | h | 1 | 0 |

|    |             |             |              |   |   |   |
|----|-------------|-------------|--------------|---|---|---|
| 68 | 10.47839016 | 1.21732228  | -2.88439675  | h | 1 | 0 |
| 69 | 10.31607495 | 3.41247202  | -0.33839289  | h | 1 | 0 |
| 70 | 9.0887382   | 0.33084245  | 0.0390177    | h | 1 | 0 |
| 71 | 7.57990837  | -1.37386535 | -9.83270939  | h | 1 | 0 |
| 72 | 4.95995291  | 0.1629243   | -11.21160702 | h | 1 | 0 |
| 73 | 11.94899249 | 0.17961338  | -10.50474933 | h | 1 | 0 |
| 74 | 14.90210313 | 2.31460624  | -13.43536926 | h | 1 | 0 |
| 75 | 13.24209194 | 5.10560022  | -16.83720137 | h | 1 | 0 |
| 76 | 8.59414522  | 5.72763521  | -17.27403678 | h | 1 | 0 |
| 77 | 5.65997374  | 3.58602675  | -14.35990869 | h | 1 | 0 |
| 78 | 4.18423731  | -1.08889639 | -6.5810889   | h | 1 | 0 |

**1b-1**

| Center<br>Number | Coordinates (Angstroms) |             |              | Atom | Atomic<br>Number | Atomic<br>Type |
|------------------|-------------------------|-------------|--------------|------|------------------|----------------|
|                  | X                       | Y           | Z            |      |                  |                |
| 1                | 2.27276234              | 3.20952597  | -8.21263714  | o    | 8                | 0              |
| 2                | 4.4803232               | 3.93369703  | -8.33389567  | c    | 6                | 0              |
| 3                | 5.04823663              | 6.40983271  | -8.80277436  | n    | 7                | 0              |
| 4                | 7.58581902              | 7.50188129  | -8.86853178  | c    | 6                | 0              |
| 5                | 2.92816103              | 8.21378978  | -8.78882515  | c    | 6                | 0              |
| 6                | 1.15807636              | 8.06776758  | -11.09991545 | c    | 6                | 0              |
| 7                | 2.36848226              | 8.73604872  | -13.6066877  | c    | 6                | 0              |
| 8                | 2.24719211              | 7.04505991  | -15.64114769 | c    | 6                | 0              |
| 9                | 3.25923135              | 7.66926375  | -17.99957555 | c    | 6                | 0              |
| 10               | 4.42836678              | 10.00569517 | -18.36212635 | c    | 6                | 0              |
| 11               | 4.55910389              | 11.71523879 | -16.35394871 | c    | 6                | 0              |
| 12               | 3.52956016              | 11.08765531 | -14.00905682 | c    | 6                | 0              |

|    |             |             |              |   |   |   |
|----|-------------|-------------|--------------|---|---|---|
| 13 | 1.37719662  | 8.07859212  | -6.32484342  | c | 6 | 0 |
| 14 | 2.87169559  | 7.61809041  | -4.30541363  | o | 8 | 0 |
| 15 | 1.64971718  | 7.38310753  | -1.82901824  | c | 6 | 0 |
| 16 | 2.70165024  | 9.44820272  | -0.10648317  | c | 6 | 0 |
| 17 | 2.01195736  | 12.13340301 | -0.9595966   | c | 6 | 0 |
| 18 | 2.98562074  | 14.17945032 | 0.84860661   | c | 6 | 0 |
| 19 | 2.327067    | 16.8734648  | 0.00191508   | c | 6 | 0 |
| 20 | 3.30056038  | 18.91052648 | 1.81487773   | c | 6 | 0 |
| 21 | 2.00857537  | 4.61636107  | -0.93223121  | c | 6 | 0 |
| 22 | 0.25378432  | 3.97468725  | 1.28921262   | c | 6 | 0 |
| 23 | 4.76745132  | 4.0716845   | -0.21187052  | c | 6 | 0 |
| 24 | 6.54976196  | 3.04569828  | -2.26737088  | c | 6 | 0 |
| 25 | 9.18795705  | 2.45970063  | -1.20569147  | c | 6 | 0 |
| 26 | 5.55827133  | 4.54653646  | 1.89328879   | o | 8 | 0 |
| 27 | -0.86274286 | 8.52453584  | -6.21970242  | o | 8 | 0 |
| 28 | 6.6149329   | 1.9708122   | -7.85126569  | c | 6 | 0 |
| 29 | 7.26900451  | 0.45927162  | -10.28403909 | c | 6 | 0 |
| 30 | 8.97314926  | 1.84134797  | -12.1188203  | c | 6 | 0 |
| 31 | 7.98606511  | 3.22857144  | -14.14499184 | c | 6 | 0 |
| 32 | 9.57961295  | 4.55315527  | -15.77916908 | c | 6 | 0 |
| 33 | 12.19209066 | 4.49448681  | -15.41916871 | c | 6 | 0 |
| 34 | 13.20310022 | 3.10251478  | -13.41646184 | c | 6 | 0 |
| 35 | 11.6040123  | 1.78789746  | -11.78279854 | c | 6 | 0 |
| 36 | 5.76820655  | 0.17842813  | -5.93529647  | n | 7 | 0 |
| 37 | 5.3757705   | 0.66189533  | -3.41295159  | c | 6 | 0 |
| 38 | 4.21822782  | -0.83594581 | -2.07711846  | o | 8 | 0 |

|    |             |             |              |   |   |   |
|----|-------------|-------------|--------------|---|---|---|
| 39 | 3.80545092  | 10.09131089 | -8.74971321  | h | 1 | 0 |
| 40 | -0.3718843  | 7.68300305  | -2.13109277  | h | 1 | 0 |
| 41 | 1.48684746  | 3.43938657  | -2.54991622  | h | 1 | 0 |
| 42 | 6.67183653  | 4.55116317  | -3.68768547  | h | 1 | 0 |
| 43 | 8.33705957  | 2.87165629  | -7.15997267  | h | 1 | 0 |
| 44 | 9.00743702  | 6.06087821  | -9.22238142  | h | 1 | 0 |
| 45 | 7.70279512  | 8.85217994  | -10.42829174 | h | 1 | 0 |
| 46 | 8.02169973  | 8.48439546  | -7.09317456  | h | 1 | 0 |
| 47 | -0.41260806 | 9.35857098  | -10.7100334  | h | 1 | 0 |
| 48 | 0.35314697  | 6.17057217  | -11.16767395 | h | 1 | 0 |
| 49 | 1.31837407  | 5.23020689  | -15.3792134  | h | 1 | 0 |
| 50 | 3.12222275  | 6.33257971  | -19.55320029 | h | 1 | 0 |
| 51 | 5.21147421  | 10.50054025 | -20.19444521 | h | 1 | 0 |
| 52 | 5.44398976  | 13.54936232 | -16.62022566 | h | 1 | 0 |
| 53 | 3.60531514  | 12.46434454 | -12.48306407 | h | 1 | 0 |
| 54 | 1.96578719  | 9.11523983  | 1.80230801   | h | 1 | 0 |
| 55 | 4.7595806   | 9.25632663  | 0.03777054   | h | 1 | 0 |
| 56 | -0.0499266  | 12.29546547 | -1.1432323   | h | 1 | 0 |
| 57 | 2.78617951  | 12.47356442 | -2.85514777  | h | 1 | 0 |
| 58 | 5.04758482  | 14.00556907 | 1.04145815   | h | 1 | 0 |
| 59 | 2.20713094  | 13.84889813 | 2.74714089   | h | 1 | 0 |
| 60 | 0.2667904   | 17.04378843 | -0.19110796  | h | 1 | 0 |
| 61 | 3.10695574  | 17.20368979 | -1.89474973  | h | 1 | 0 |
| 62 | 2.80072192  | 20.80919878 | 1.16012484   | h | 1 | 0 |
| 63 | 2.50098691  | 18.66975844 | 3.71094091   | h | 1 | 0 |
| 64 | 5.36281165  | 18.82946502 | 1.99527968   | h | 1 | 0 |

|    |             |             |              |   |   |   |
|----|-------------|-------------|--------------|---|---|---|
| 65 | 0.82816904  | 4.96513721  | 3.00731545   | h | 1 | 0 |
| 66 | 0.33808512  | 1.9459929   | 1.67137619   | h | 1 | 0 |
| 67 | -1.70465684 | 4.47024666  | 0.84242533   | h | 1 | 0 |
| 68 | 10.47879573 | 1.86973094  | -2.71077491  | h | 1 | 0 |
| 69 | 9.96790381  | 4.12100455  | -0.26221478  | h | 1 | 0 |
| 70 | 9.06309274  | 0.93911038  | 0.18644552   | h | 1 | 0 |
| 71 | 8.20077184  | -1.28008312 | -9.65714099  | h | 1 | 0 |
| 72 | 5.49341641  | -0.0900366  | -11.20029911 | h | 1 | 0 |
| 73 | 5.95624452  | 3.29457248  | -14.44110577 | h | 1 | 0 |
| 74 | 8.7675158   | 5.63683022  | -17.32142173 | h | 1 | 0 |
| 75 | 13.43392294 | 5.51836307  | -16.69391066 | h | 1 | 0 |
| 76 | 15.2356482  | 3.03011679  | -13.13293758 | h | 1 | 0 |
| 77 | 12.40419902 | 0.69337032  | -10.23672414 | h | 1 | 0 |
| 78 | 4.64616998  | -1.24306842 | -6.56181599  | h | 1 | 0 |

**1b-2**

| Center<br>Number | Coordinates (Angstroms) |            |              | Atom | Atomic<br>Number | Atomic<br>Type |
|------------------|-------------------------|------------|--------------|------|------------------|----------------|
|                  | X                       | Y          | Z            |      |                  |                |
| 1                | 2.50814438              | 3.80598956 | -8.19939971  | o    | 8                | 0              |
| 2                | 4.42930462              | 4.97464499 | -8.78829686  | c    | 6                | 0              |
| 3                | 4.36243146              | 7.51135296 | -9.27030234  | n    | 7                | 0              |
| 4                | 6.53052587              | 9.07394582 | -9.96576534  | c    | 6                | 0              |
| 5                | 1.95642339              | 8.82425835 | -8.81206214  | c    | 6                | 0              |
| 6                | -0.04554331             | 8.36119513 | -10.88735191 | c    | 6                | 0              |
| 7                | 0.84495439              | 9.16248526 | -13.48360166 | c    | 6                | 0              |
| 8                | 1.77672357              | 7.38231318 | -15.21100586 | c    | 6                | 0              |
| 9                | 2.64741892              | 8.12455456 | -17.59000875 | c    | 6                | 0              |

|    |             |             |              |   |   |   |
|----|-------------|-------------|--------------|---|---|---|
| 10 | 2.60311484  | 10.66996972 | -18.2816975  | c | 6 | 0 |
| 11 | 1.66949211  | 12.46402717 | -16.58436741 | c | 6 | 0 |
| 12 | 0.79631232  | 11.71243159 | -14.21152943 | c | 6 | 0 |
| 13 | 0.86400996  | 8.25349774  | -6.17589222  | c | 6 | 0 |
| 14 | 2.70785789  | 8.10101276  | -4.41713882  | o | 8 | 0 |
| 15 | 1.9805233   | 7.38224979  | -1.84209938  | c | 6 | 0 |
| 16 | 2.69043146  | 9.5438772   | -0.06491335  | c | 6 | 0 |
| 17 | 1.19255311  | 11.98088387 | -0.54053048  | c | 6 | 0 |
| 18 | 1.8664021   | 14.09752526 | 1.32218318   | c | 6 | 0 |
| 19 | 0.39260315  | 16.55153499 | 0.86445026   | c | 6 | 0 |
| 20 | 1.0768888   | 18.65837934 | 2.72915622   | c | 6 | 0 |
| 21 | 3.2039368   | 4.77389162  | -1.29348156  | c | 6 | 0 |
| 22 | 2.08760657  | 3.54435156  | 1.08752171   | c | 6 | 0 |
| 23 | 6.08964513  | 4.97529408  | -1.04752315  | c | 6 | 0 |
| 24 | 7.70753436  | 4.49089274  | -3.41321289  | c | 6 | 0 |
| 25 | 10.547209   | 4.64841335  | -2.82712599  | c | 6 | 0 |
| 26 | 7.0676866   | 5.61042179  | 0.93307762   | o | 8 | 0 |
| 27 | -1.37855679 | 8.15215066  | -5.74328423  | o | 8 | 0 |
| 28 | 6.98174428  | 3.54543058  | -8.95242036  | c | 6 | 0 |
| 29 | 7.25905542  | 2.38008836  | -11.62687685 | c | 6 | 0 |
| 30 | 9.74985183  | 1.04178427  | -12.0619424  | c | 6 | 0 |
| 31 | 11.94454912 | 2.42713848  | -12.59660041 | c | 6 | 0 |
| 32 | 14.2565509  | 1.21418883  | -12.95826666 | c | 6 | 0 |
| 33 | 14.40920717 | -1.41626078 | -12.7965535  | c | 6 | 0 |
| 34 | 12.23588719 | -2.81842878 | -12.28118246 | c | 6 | 0 |
| 35 | 9.92589565  | -1.59542128 | -11.92117228 | c | 6 | 0 |

|    |             |             |              |   |   |   |
|----|-------------|-------------|--------------|---|---|---|
| 36 | 7.07196278  | 1.56158018  | -7.05494862  | n | 7 | 0 |
| 37 | 7.0601511   | 1.87767325  | -4.47772852  | c | 6 | 0 |
| 38 | 6.66048947  | 0.09347902  | -3.05490076  | o | 8 | 0 |
| 39 | 2.41591325  | 10.84601634 | -8.78486062  | h | 1 | 0 |
| 40 | -0.06942726 | 7.12239026  | -1.84940833  | h | 1 | 0 |
| 41 | 2.74350836  | 3.59571091  | -2.92925217  | h | 1 | 0 |
| 42 | 7.17334308  | 5.98005272  | -4.75140365  | h | 1 | 0 |
| 43 | 8.57316141  | 4.82045266  | -8.62547884  | h | 1 | 0 |
| 44 | 7.9989927   | 7.95094632  | -10.87030195 | h | 1 | 0 |
| 45 | 5.92513327  | 10.49350242 | -11.33761945 | h | 1 | 0 |
| 46 | 7.34039157  | 10.03864615 | -8.31628865  | h | 1 | 0 |
| 47 | -1.74314957 | 9.40544912  | -10.33805084 | h | 1 | 0 |
| 48 | -0.53517353 | 6.35689789  | -10.86095022 | h | 1 | 0 |
| 49 | 1.79197338  | 5.39462569  | -14.69038773 | h | 1 | 0 |
| 50 | 3.34854834  | 6.71253241  | -18.90637168 | h | 1 | 0 |
| 51 | 3.27376758  | 11.25098095 | -20.13315339 | h | 1 | 0 |
| 52 | 1.60548813  | 14.44705849 | -17.11461295 | h | 1 | 0 |
| 53 | 0.04715094  | 13.11950913 | -12.91223973 | h | 1 | 0 |
| 54 | 2.36481806  | 8.89888085  | 1.87772808   | h | 1 | 0 |
| 55 | 4.72256825  | 9.92066946  | -0.2045307   | h | 1 | 0 |
| 56 | -0.84167891 | 11.57991498 | -0.42945741  | h | 1 | 0 |
| 57 | 1.54326977  | 12.63819457 | -2.47741421  | h | 1 | 0 |
| 58 | 3.90441625  | 14.4903208  | 1.21181062   | h | 1 | 0 |
| 59 | 1.51859197  | 13.4430549  | 3.26383181   | h | 1 | 0 |
| 60 | -1.64268463 | 16.15742852 | 0.97964599   | h | 1 | 0 |
| 61 | 0.73830131  | 17.20487499 | -1.07652428  | h | 1 | 0 |

|    |             |             |              |   |   |   |
|----|-------------|-------------|--------------|---|---|---|
| 62 | -0.0083428  | 20.38146437 | 2.35872666   | h | 1 | 0 |
| 63 | 0.69344792  | 18.08307723 | 4.68222676   | h | 1 | 0 |
| 64 | 3.08777146  | 19.14300331 | 2.60795985   | h | 1 | 0 |
| 65 | 2.67300015  | 4.55090725  | 2.79214678   | h | 1 | 0 |
| 66 | 2.76201333  | 1.59700923  | 1.23838662   | h | 1 | 0 |
| 67 | 0.02121728  | 3.51050539  | 0.99460941   | h | 1 | 0 |
| 68 | 11.67034998 | 4.42399607  | -4.54947117  | h | 1 | 0 |
| 69 | 11.00205212 | 6.46326603  | -1.95530861  | h | 1 | 0 |
| 70 | 11.07325803 | 3.15676257  | -1.49985812  | h | 1 | 0 |
| 71 | 5.67116499  | 1.07864565  | -11.90909296 | h | 1 | 0 |
| 72 | 7.01563804  | 3.90249434  | -13.01171621 | h | 1 | 0 |
| 73 | 11.84130647 | 4.47586881  | -12.74742834 | h | 1 | 0 |
| 74 | 15.93551483 | 2.3196972   | -13.3766444  | h | 1 | 0 |
| 75 | 16.20748557 | -2.36502804 | -13.07997754 | h | 1 | 0 |
| 76 | 12.33394728 | -4.8656715  | -12.16212739 | h | 1 | 0 |
| 77 | 8.23879058  | -2.7066619  | -11.54246183 | h | 1 | 0 |
| 78 | 6.40030341  | -0.15557195 | -7.56839123  | h | 1 | 0 |

### 1b-3

| Center<br>Number | Coordinates (Angstroms) |            |              | Atom | Atomic<br>Number | Atomic<br>Type |
|------------------|-------------------------|------------|--------------|------|------------------|----------------|
|                  | X                       | Y          | Z            |      |                  |                |
| 1                | 2.26590601              | 3.26314473 | -8.17229045  | o    | 8                | 0              |
| 2                | 4.47576256              | 3.98332647 | -8.27807991  | c    | 6                | 0              |
| 3                | 5.05026632              | 6.46481456 | -8.70742314  | n    | 7                | 0              |
| 4                | 7.58931646              | 7.5541686  | -8.7517153   | c    | 6                | 0              |
| 5                | 2.93332876              | 8.27222295 | -8.67548939  | c    | 6                | 0              |
| 6                | 1.17248083              | 8.16206141 | -10.99551301 | c    | 6                | 0              |



|    |             |             |              |   |   |   |
|----|-------------|-------------|--------------|---|---|---|
| 7  | 2.39663346  | 8.85651057  | -13.48849773 | c | 6 | 0 |
| 8  | 2.27779164  | 7.19136418  | -15.54427686 | c | 6 | 0 |
| 9  | 3.30382352  | 7.84033043  | -17.88994586 | c | 6 | 0 |
| 10 | 4.48524294  | 10.17572698 | -18.21783401 | c | 6 | 0 |
| 11 | 4.61370811  | 11.8597492  | -16.1879816  | c | 6 | 0 |
| 12 | 3.56976238  | 11.20780441 | -13.85612515 | c | 6 | 0 |
| 13 | 1.37234011  | 8.10188018  | -6.21987486  | c | 6 | 0 |
| 14 | 2.86008161  | 7.61609616  | -4.20129541  | o | 8 | 0 |
| 15 | 1.62946751  | 7.33688651  | -1.73372776  | c | 6 | 0 |
| 16 | 2.69870645  | 9.35275005  | 0.03559998   | c | 6 | 0 |
| 17 | 1.99519252  | 12.06150025 | -0.72902587  | c | 6 | 0 |
| 18 | 3.00712486  | 14.04290807 | 1.13349178   | c | 6 | 0 |
| 19 | 2.24366819  | 16.77973836 | 0.5201836    | c | 6 | 0 |
| 20 | 3.36370889  | 17.81888396 | -1.94327529  | c | 6 | 0 |
| 21 | 1.96126051  | 4.54819611  | -0.89523847  | c | 6 | 0 |
| 22 | 0.1784659   | 3.868827    | 1.29227477   | c | 6 | 0 |
| 23 | 4.7089398   | 3.97028896  | -0.15845559  | c | 6 | 0 |
| 24 | 6.50571235  | 2.98360094  | -2.22034719  | c | 6 | 0 |
| 25 | 9.13627894  | 2.3772778   | -1.15155017  | c | 6 | 0 |
| 26 | 5.47945695  | 4.38693456  | 1.96625855   | o | 8 | 0 |
| 27 | -0.86853549 | 8.5435613   | -6.11711376  | o | 8 | 0 |
| 28 | 6.60419104  | 2.00754524  | -7.82198788  | c | 6 | 0 |
| 29 | 7.2663089   | 0.53962875  | -10.27945036 | c | 6 | 0 |
| 30 | 8.9914756   | 1.946538    | -12.07516085 | c | 6 | 0 |
| 31 | 11.61889914 | 1.87879029  | -11.71581517 | c | 6 | 0 |
| 32 | 13.23712534 | 3.21575277  | -13.31204952 | c | 6 | 0 |

|    |             |             |              |   |   |   |
|----|-------------|-------------|--------------|---|---|---|
| 33 | 12.24902716 | 4.64437521  | -15.30036691 | c | 6 | 0 |
| 34 | 9.64024683  | 4.71662255  | -15.68403187 | c | 6 | 0 |
| 35 | 8.02752856  | 3.37025387  | -14.08694319 | c | 6 | 0 |
| 36 | 5.74551579  | 0.18197352  | -5.94336617  | n | 7 | 0 |
| 37 | 5.33761867  | 0.62099457  | -3.41544672  | c | 6 | 0 |
| 38 | 4.17098025  | -0.89958494 | -2.11361932  | o | 8 | 0 |
| 39 | 3.81385179  | 10.1472992  | -8.60580225  | h | 1 | 0 |
| 40 | -0.38866623 | 7.66184539  | -2.03332133  | h | 1 | 0 |
| 41 | 1.44950527  | 3.41020311  | -2.54399235  | h | 1 | 0 |
| 42 | 6.63751549  | 4.51364721  | -3.61320221  | h | 1 | 0 |
| 43 | 8.32477225  | 2.89213176  | -7.10641638  | h | 1 | 0 |
| 44 | 9.01206912  | 6.11270212  | -9.0982489   | h | 1 | 0 |
| 45 | 7.72011041  | 8.9093845   | -10.30617151 | h | 1 | 0 |
| 46 | 8.01209556  | 8.52996159  | -6.96966923  | h | 1 | 0 |
| 47 | -0.39504473 | 9.45395822  | -10.59651689 | h | 1 | 0 |
| 48 | 0.36038064  | 6.26903975  | -11.09033569 | h | 1 | 0 |
| 49 | 1.34072913  | 5.37709095  | -15.30911647 | h | 1 | 0 |
| 50 | 3.1681847   | 6.52383749  | -19.46080209 | h | 1 | 0 |
| 51 | 5.27950178  | 10.68964372 | -20.04008734 | h | 1 | 0 |
| 52 | 5.50821478  | 13.69294756 | -16.42711555 | h | 1 | 0 |
| 53 | 3.64446086  | 12.56485695 | -12.31267447 | h | 1 | 0 |
| 54 | 1.99020469  | 8.96301828  | 1.94380867   | h | 1 | 0 |
| 55 | 4.75880848  | 9.15928354  | 0.14670352   | h | 1 | 0 |
| 56 | -0.07090675 | 12.2305274  | -0.85868252  | h | 1 | 0 |
| 57 | 2.72614668  | 12.44108082 | -2.63121123  | h | 1 | 0 |
| 58 | 5.07987265  | 13.91235567 | 1.21717007   | h | 1 | 0 |

| 59               | 2.32978449              | 13.5735315  | 3.03940286   | h    | 1                | 0              |
|------------------|-------------------------|-------------|--------------|------|------------------|----------------|
| 60               | 2.83437954              | 17.99785165 | 2.09196808   | h    | 1                | 0              |
| 61               | 0.17221135              | 16.9082641  | 0.44441852   | h    | 1                | 0              |
| 62               | 2.835861                | 19.80065598 | -2.22282844  | h    | 1                | 0              |
| 63               | 5.43397517              | 17.71880777 | -1.92101798  | h    | 1                | 0              |
| 64               | 2.70249601              | 16.76560316 | -3.59768698  | h    | 1                | 0              |
| 65               | 0.72497794              | 4.83464062  | 3.03338244   | h    | 1                | 0              |
| 66               | 0.26326552              | 1.83494338  | 1.64555673   | h    | 1                | 0              |
| 67               | -1.7747602              | 4.36601089  | 0.82513307   | h    | 1                | 0              |
| 68               | 10.43128727             | 1.79401002  | -2.65564312  | h    | 1                | 0              |
| 69               | 9.92022485              | 4.02724388  | -0.1913264   | h    | 1                | 0              |
| 70               | 8.99806204              | 0.84628857  | 0.22760727   | h    | 1                | 0              |
| 71               | 8.18392323              | -1.21688095 | -9.67999115  | h    | 1                | 0              |
| 72               | 5.49423499              | 0.01822695  | -11.21852547 | h    | 1                | 0              |
| 73               | 12.40128053             | 0.75601463  | -10.18091487 | h    | 1                | 0              |
| 74               | 15.26669673             | 3.13233524  | -13.01075774 | h    | 1                | 0              |
| 75               | 13.5057506              | 5.68606623  | -16.5457556  | h    | 1                | 0              |
| 76               | 8.8459252               | 5.82694729  | -17.21658383 | h    | 1                | 0              |
| 77               | 6.00081577              | 3.44790133  | -14.40060576 | h    | 1                | 0              |
| 78               | 4.62760171              | -1.22839522 | -6.60143706  | h    | 1                | 0              |
| <b>1b-4</b>      |                         |             |              |      |                  |                |
| Center<br>Number | Coordinates (Angstroms) |             |              | Atom | Atomic<br>Number | Atomic<br>Type |
|                  | X                       | Y           | Z            |      |                  |                |
| 1                | 2.33431636              | 3.12010189  | -8.20409935  | o    | 8                | 0              |
| 2                | 4.49192505              | 3.98317754  | -8.32264082  | c    | 6                | 0              |
| 3                | 4.90334054              | 6.47182217  | -8.87864748  | n    | 7                | 0              |

|    |             |             |              |   |   |   |
|----|-------------|-------------|--------------|---|---|---|
| 4  | 7.36311139  | 7.72845536  | -8.95754121  | c | 6 | 0 |
| 5  | 2.66844304  | 8.1292181   | -8.97152969  | c | 6 | 0 |
| 6  | 0.9586395   | 7.77760699  | -11.30656744 | c | 6 | 0 |
| 7  | 2.1655586   | 8.44408567  | -13.81545069 | c | 6 | 0 |
| 8  | 2.20511991  | 6.67881265  | -15.78926771 | c | 6 | 0 |
| 9  | 3.21262544  | 7.29286449  | -18.15235727 | c | 6 | 0 |
| 10 | 4.21670179  | 9.69416412  | -18.5797589  | c | 6 | 0 |
| 11 | 4.18611054  | 11.47754959 | -16.63249513 | c | 6 | 0 |
| 12 | 3.16060067  | 10.85882847 | -14.28366969 | c | 6 | 0 |
| 13 | 1.08005789  | 7.98128842  | -6.53234112  | c | 6 | 0 |
| 14 | 2.56116651  | 7.70679288  | -4.46952311  | o | 8 | 0 |
| 15 | 1.30638304  | 7.47304152  | -2.00925851  | c | 6 | 0 |
| 16 | 2.19187968  | 9.65449672  | -0.33653464  | c | 6 | 0 |
| 17 | 1.36155478  | 12.26025553 | -1.31157034  | c | 6 | 0 |
| 18 | 1.98392291  | 14.45559987 | 0.48797289   | c | 6 | 0 |
| 19 | 4.816228    | 14.95098006 | 0.88158688   | c | 6 | 0 |
| 20 | 5.33187348  | 17.25280357 | 2.56279727   | c | 6 | 0 |
| 21 | 1.82137455  | 4.76433851  | -1.01579925  | c | 6 | 0 |
| 22 | 0.05787102  | 4.07739794  | 1.18509741   | c | 6 | 0 |
| 23 | 4.59073845  | 4.42574241  | -0.21642189  | c | 6 | 0 |
| 24 | 6.48564695  | 3.45464427  | -2.1960048   | c | 6 | 0 |
| 25 | 9.13345312  | 3.09310553  | -1.06039479  | c | 6 | 0 |
| 26 | 5.29666334  | 5.01891047  | 1.88894249   | o | 8 | 0 |
| 27 | -1.18721362 | 8.27249845  | -6.48479917  | o | 8 | 0 |
| 28 | 6.74200865  | 2.18509845  | -7.73476941  | c | 6 | 0 |
| 29 | 7.53796951  | 0.63391218  | -10.09954152 | c | 6 | 0 |

|    |             |             |              |   |   |   |
|----|-------------|-------------|--------------|---|---|---|
| 30 | 9.18158651  | 2.0577358   | -11.95749968 | c | 6 | 0 |
| 31 | 8.14350922  | 3.30469689  | -14.04840216 | c | 6 | 0 |
| 32 | 9.67740583  | 4.66941004  | -15.70646085 | c | 6 | 0 |
| 33 | 12.28167128 | 4.7921127   | -15.30517089 | c | 6 | 0 |
| 34 | 13.34410181 | 3.54250131  | -13.23627605 | c | 6 | 0 |
| 35 | 11.80398076 | 2.18684124  | -11.57952891 | c | 6 | 0 |
| 36 | 5.98257382  | 0.40935894  | -5.7674146   | n | 7 | 0 |
| 37 | 5.50518732  | 0.95415269  | -3.27237696  | c | 6 | 0 |
| 38 | 4.42807605  | -0.57279832 | -1.90276525  | o | 8 | 0 |
| 39 | 3.41846082  | 10.0613226  | -8.98917206  | h | 1 | 0 |
| 40 | -0.72338531 | 7.63402138  | -2.35799104  | h | 1 | 0 |
| 41 | 1.41671915  | 3.50641796  | -2.60590654  | h | 1 | 0 |
| 42 | 6.53542886  | 4.91124785  | -3.67073682  | h | 1 | 0 |
| 43 | 8.38858871  | 3.22359928  | -7.0512431   | h | 1 | 0 |
| 44 | 8.88515367  | 6.37102326  | -9.2116119   | h | 1 | 0 |
| 45 | 7.42274813  | 9.00347481  | -10.58250711 | h | 1 | 0 |
| 46 | 7.69463877  | 8.82541337  | -7.2276753   | h | 1 | 0 |
| 47 | -0.70716164 | 8.96525795  | -10.99026479 | h | 1 | 0 |
| 48 | 0.29099445  | 5.82682904  | -11.31972886 | h | 1 | 0 |
| 49 | 1.40575085  | 4.81130665  | -15.47660165 | h | 1 | 0 |
| 50 | 3.20054697  | 5.89707298  | -19.65915134 | h | 1 | 0 |
| 51 | 4.99612541  | 10.18090413 | -20.41584361 | h | 1 | 0 |
| 52 | 4.94188476  | 13.36054766 | -16.95042088 | h | 1 | 0 |
| 53 | 3.10624911  | 12.2900401  | -12.80767374 | h | 1 | 0 |
| 54 | 1.41550658  | 9.34760114  | 1.56131802   | h | 1 | 0 |
| 55 | 4.24899247  | 9.57333841  | -0.12985743  | h | 1 | 0 |

|    |             |             |              |   |   |   |
|----|-------------|-------------|--------------|---|---|---|
| 56 | -0.6843377  | 12.23119532 | -1.65486172  | h | 1 | 0 |
| 57 | 2.24818594  | 12.61757277 | -3.15433986  | h | 1 | 0 |
| 58 | 1.08954547  | 14.10692772 | 2.3316749    | h | 1 | 0 |
| 59 | 1.10444634  | 16.18442548 | -0.25283275  | h | 1 | 0 |
| 60 | 5.72107312  | 15.2284281  | -0.96831647  | h | 1 | 0 |
| 61 | 5.71773603  | 13.28203704 | 1.71919864   | h | 1 | 0 |
| 62 | 7.36176491  | 17.56929753 | 2.8137826    | h | 1 | 0 |
| 63 | 4.52169818  | 18.97542396 | 1.74463037   | h | 1 | 0 |
| 64 | 4.49858162  | 17.00616577 | 4.443414     | h | 1 | 0 |
| 65 | 0.50166049  | 5.17860004  | 2.87430687   | h | 1 | 0 |
| 66 | 0.28738593  | 2.07866045  | 1.65558069   | h | 1 | 0 |
| 67 | -1.91890407 | 4.399022    | 0.66607098   | h | 1 | 0 |
| 68 | 10.48921481 | 2.5130063   | -2.51113433  | h | 1 | 0 |
| 69 | 9.7884624   | 4.84575736  | -0.18977228  | h | 1 | 0 |
| 70 | 9.07668805  | 1.63925356  | 0.40576295   | h | 1 | 0 |
| 71 | 8.57058367  | -1.01636181 | -9.39405573  | h | 1 | 0 |
| 72 | 5.81902399  | -0.0638751  | -11.02211361 | h | 1 | 0 |
| 73 | 6.11900124  | 3.229677    | -14.37723872 | h | 1 | 0 |
| 74 | 8.82475812  | 5.64224843  | -17.29987822 | h | 1 | 0 |
| 75 | 13.47810637 | 5.84535741  | -16.59926493 | h | 1 | 0 |
| 76 | 15.37158219 | 3.61354158  | -12.9181325  | h | 1 | 0 |
| 77 | 12.64542525 | 1.2023622   | -9.98222447  | h | 1 | 0 |
| 78 | 4.97881991  | -1.11173583 | -6.35951362  | h | 1 | 0 |

**1b-5**

| Center<br>Number | Coordinates (Angstroms) |   |   | Atom | Atomic<br>Number | Atomic<br>Type |
|------------------|-------------------------|---|---|------|------------------|----------------|
|                  | X                       | Y | Z |      |                  |                |

|    |             |             |              |   |   |   |
|----|-------------|-------------|--------------|---|---|---|
| 1  | 2.22179094  | 3.71843569  | -7.92919614  | o | 8 | 0 |
| 2  | 4.49577639  | 4.14017402  | -8.18388675  | c | 6 | 0 |
| 3  | 5.36580367  | 6.52952579  | -8.64083439  | n | 7 | 0 |
| 4  | 8.01932968  | 7.27266021  | -8.85419074  | c | 6 | 0 |
| 5  | 3.51719528  | 8.60166372  | -8.45947492  | c | 6 | 0 |
| 6  | 1.59401984  | 8.746686    | -10.64628534 | c | 6 | 0 |
| 7  | 2.71660136  | 9.2944451   | -13.22207941 | c | 6 | 0 |
| 8  | 2.2429512   | 7.6679828   | -15.2573696  | c | 6 | 0 |
| 9  | 3.17240359  | 8.19420317  | -17.67305174 | c | 6 | 0 |
| 10 | 4.61141678  | 10.36450578 | -18.09339109 | c | 6 | 0 |
| 11 | 5.0947494   | 12.00875405 | -16.08454622 | c | 6 | 0 |
| 12 | 4.14712306  | 11.48148092 | -13.68109099 | c | 6 | 0 |
| 13 | 2.12905243  | 8.62896348  | -5.89645867  | c | 6 | 0 |
| 14 | 3.65682937  | 7.88979058  | -3.99207662  | o | 8 | 0 |
| 15 | 2.56839099  | 7.75159269  | -1.44509552  | c | 6 | 0 |
| 16 | 4.02791279  | 9.57750397  | 0.25381436   | c | 6 | 0 |
| 17 | 3.76683472  | 12.38403377 | -0.45696447  | c | 6 | 0 |
| 18 | 1.09489142  | 13.48104258 | -0.18653175  | c | 6 | 0 |
| 19 | 0.98952482  | 16.33881167 | -0.67093793  | c | 6 | 0 |
| 20 | -1.67467643 | 17.44011784 | -0.40785009  | c | 6 | 0 |
| 21 | 2.57850532  | 4.93317373  | -0.63687421  | c | 6 | 0 |
| 22 | 0.87462999  | 4.47798229  | 1.66923606   | c | 6 | 0 |
| 23 | 5.2641172   | 3.97491385  | -0.09465204  | c | 6 | 0 |
| 24 | 6.76904029  | 2.78972277  | -2.2814285   | c | 6 | 0 |
| 25 | 9.35902447  | 1.81823153  | -1.39904566  | c | 6 | 0 |
| 26 | 6.22337922  | 4.24664028  | 1.97586485   | o | 8 | 0 |

|    |             |             |              |   |   |   |
|----|-------------|-------------|--------------|---|---|---|
| 27 | -0.00734837 | 9.40622795  | -5.6350383   | o | 8 | 0 |
| 28 | 6.36856783  | 1.89477751  | -7.88230077  | c | 6 | 0 |
| 29 | 6.67440857  | 0.38680218  | -10.38481414 | c | 6 | 0 |
| 30 | 8.44552709  | 1.58223413  | -12.28581323 | c | 6 | 0 |
| 31 | 7.54293589  | 3.13665204  | -14.22815669 | c | 6 | 0 |
| 32 | 9.20753985  | 4.28413032  | -15.92424389 | c | 6 | 0 |
| 33 | 11.80529219 | 3.87819199  | -15.71108479 | c | 6 | 0 |
| 34 | 12.72966639 | 2.31527623  | -13.7943712  | c | 6 | 0 |
| 35 | 11.06075652 | 1.17856299  | -12.09830136 | c | 6 | 0 |
| 36 | 5.39852027  | 0.17065864  | -5.96267215  | n | 7 | 0 |
| 37 | 5.21593746  | 0.62432721  | -3.41111353  | c | 6 | 0 |
| 38 | 3.93899214  | -0.74326623 | -2.04466775  | o | 8 | 0 |
| 39 | 4.64194413  | 10.34341342 | -8.45942972  | h | 1 | 0 |
| 40 | 0.59603414  | 8.33275255  | -1.60790915  | h | 1 | 0 |
| 41 | 1.80336951  | 3.89488433  | -2.24762979  | h | 1 | 0 |
| 42 | 7.01283738  | 4.30969255  | -3.66919731  | h | 1 | 0 |
| 43 | 8.23276299  | 2.5356647   | -7.27488642  | h | 1 | 0 |
| 44 | 9.21108636  | 5.65967603  | -9.30269752  | h | 1 | 0 |
| 45 | 8.22482871  | 8.61855222  | -10.40888556 | h | 1 | 0 |
| 46 | 8.68802702  | 8.15917951  | -7.10128995  | h | 1 | 0 |
| 47 | 0.24644793  | 10.23194035 | -10.13535491 | h | 1 | 0 |
| 48 | 0.5331497   | 6.97875948  | -10.68068745 | h | 1 | 0 |
| 49 | 1.1031596   | 5.98562863  | -14.9483225  | h | 1 | 0 |
| 50 | 2.76020292  | 6.91304547  | -19.22469495 | h | 1 | 0 |
| 51 | 5.33163312  | 10.78436046 | -19.96970066 | h | 1 | 0 |
| 52 | 6.19200514  | 13.71681043 | -16.39511753 | h | 1 | 0 |



|    |             |             |              |   |   |   |
|----|-------------|-------------|--------------|---|---|---|
| 53 | 4.50141424  | 12.81065724 | -12.15234409 | h | 1 | 0 |
| 54 | 3.36795207  | 9.29329667  | 2.19777289   | h | 1 | 0 |
| 55 | 6.02959096  | 9.04890339  | 0.25329943   | h | 1 | 0 |
| 56 | 4.43824381  | 12.66793972 | -2.40130519  | h | 1 | 0 |
| 57 | 5.06353423  | 13.46468444 | 0.75089693   | h | 1 | 0 |
| 58 | 0.38243772  | 13.08748849 | 1.72700484   | h | 1 | 0 |
| 59 | -0.19543922 | 12.5320853  | -1.50350005  | h | 1 | 0 |
| 60 | 1.71458102  | 16.73379543 | -2.57702403  | h | 1 | 0 |
| 61 | 2.27440182  | 17.30733264 | 0.64260673   | h | 1 | 0 |
| 62 | -1.69173183 | 19.47892356 | -0.76533606  | h | 1 | 0 |
| 63 | -2.98482937 | 16.55421024 | -1.74548253  | h | 1 | 0 |
| 64 | -2.42719314 | 17.13101908 | 1.49794263   | h | 1 | 0 |
| 65 | 1.66763331  | 5.33975416  | 3.36913303   | h | 1 | 0 |
| 66 | 0.70518735  | 2.44750153  | 2.01164321   | h | 1 | 0 |
| 67 | -1.02052497 | 5.24089885  | 1.34144219   | h | 1 | 0 |
| 68 | 10.45832052 | 1.08801032  | -2.99225237  | h | 1 | 0 |
| 69 | 10.42212062 | 3.33310673  | -0.48546844  | h | 1 | 0 |
| 70 | 9.10776106  | 0.29977804  | -0.02252866  | h | 1 | 0 |
| 71 | 7.3945314   | -1.48067686 | -9.85522727  | h | 1 | 0 |
| 72 | 4.79259741  | 0.10998161  | -11.20649865 | h | 1 | 0 |
| 73 | 5.52655802  | 3.47293588  | -14.40942658 | h | 1 | 0 |
| 74 | 8.46426611  | 5.50268623  | -17.39914285 | h | 1 | 0 |
| 75 | 13.10156799 | 4.76545114  | -17.03314783 | h | 1 | 0 |
| 76 | 14.74721783 | 1.97164167  | -13.62673261 | h | 1 | 0 |
| 77 | 11.79111112 | -0.04934019 | -10.61921165 | h | 1 | 0 |
| 78 | 4.0598288   | -1.06657426 | -6.55367619  | h | 1 | 0 |

**1b-6**

| Center<br>Number | Coordinates (Angstroms) |             |              | Atom | Atomic<br>Number | Atomic<br>Type |
|------------------|-------------------------|-------------|--------------|------|------------------|----------------|
|                  | X                       | Y           | Z            |      |                  |                |
| 1                | 2.5095653               | 3.8522464   | -8.17308874  | o    | 8                | 0              |
| 2                | 4.44039721              | 5.02772827  | -8.71529063  | c    | 6                | 0              |
| 3                | 4.38645146              | 7.57502089  | -9.13900772  | n    | 7                | 0              |
| 4                | 6.56873335              | 9.14556689  | -9.76934189  | c    | 6                | 0              |
| 5                | 1.9803119               | 8.88480038  | -8.67313291  | c    | 6                | 0              |
| 6                | -0.00353939             | 8.47640106  | -10.77691705 | c    | 6                | 0              |
| 7                | 0.91432562              | 9.33212638  | -13.34620269 | c    | 6                | 0              |
| 8                | 1.84638845              | 7.58611581  | -15.1078416  | c    | 6                | 0              |
| 9                | 2.73991359              | 8.37734085  | -17.46247543 | c    | 6                | 0              |
| 10               | 2.71902791              | 10.93840911 | -18.09467992 | c    | 6                | 0              |
| 11               | 1.78645924              | 12.699239   | -16.36232741 | c    | 6                | 0              |
| 12               | 0.89017216              | 11.89881111 | -14.01421839 | c    | 6                | 0              |
| 13               | 0.8615397               | 8.25659968  | -6.06120371  | c    | 6                | 0              |
| 14               | 2.68856216              | 8.05658946  | -4.28968852  | o    | 8                | 0              |
| 15               | 1.93505164              | 7.28476597  | -1.73777547  | c    | 6                | 0              |
| 16               | 2.65219877              | 9.39828977  | 0.09388901   | c    | 6                | 0              |
| 17               | 1.18048085              | 11.86028753 | -0.33654856  | c    | 6                | 0              |
| 18               | 1.87693489              | 13.92146776 | 1.58326264   | c    | 6                | 0              |
| 19               | 0.37371846              | 16.39328996 | 1.30388086   | c    | 6                | 0              |
| 20               | 0.87745177              | 17.83672512 | -1.15912525  | c    | 6                | 0              |
| 21               | 3.12985333              | 4.65266983  | -1.2400542   | c    | 6                | 0              |
| 22               | 1.97498841              | 3.37457708  | 1.09646762   | c    | 6                | 0              |
| 23               | 6.0141312               | 4.82219437  | -0.95627483  | c    | 6                | 0              |

|    |             |             |              |   |   |   |
|----|-------------|-------------|--------------|---|---|---|
| 24 | 7.65415268  | 4.39379742  | -3.31746412  | c | 6 | 0 |
| 25 | 10.48838953 | 4.5225225   | -2.69865057  | c | 6 | 0 |
| 26 | 6.97504198  | 5.38994573  | 1.05291351   | o | 8 | 0 |
| 27 | -1.38532705 | 8.15365769  | -5.65158251  | o | 8 | 0 |
| 28 | 6.98962905  | 3.59393282  | -8.88800687  | c | 6 | 0 |
| 29 | 7.29218505  | 2.49658337  | -11.58819302 | c | 6 | 0 |
| 30 | 9.77915821  | 1.15271429  | -12.0283365  | c | 6 | 0 |
| 31 | 11.99331776 | 2.53595273  | -12.48234996 | c | 6 | 0 |
| 32 | 14.3004867  | 1.31551608  | -12.8496559  | c | 6 | 0 |
| 33 | 14.42871416 | -1.32023847 | -12.77533719 | c | 6 | 0 |
| 34 | 12.23619222 | -2.71968227 | -12.34039879 | c | 6 | 0 |
| 35 | 9.93116833  | -1.4891354  | -11.97371158 | c | 6 | 0 |
| 36 | 7.05202749  | 1.56154426  | -7.0413254   | n | 7 | 0 |
| 37 | 7.00665252  | 1.81203948  | -4.45707228  | c | 6 | 0 |
| 38 | 6.57913205  | -0.00580118 | -3.08601583  | o | 8 | 0 |
| 39 | 2.44550149  | 10.90384169 | -8.59485768  | h | 1 | 0 |
| 40 | -0.11699638 | 7.0446773   | -1.76637523  | h | 1 | 0 |
| 41 | 2.67875066  | 3.51936961  | -2.90991901  | h | 1 | 0 |
| 42 | 7.14033624  | 5.91999264  | -4.62156047  | h | 1 | 0 |
| 43 | 8.58131736  | 4.85462459  | -8.51102955  | h | 1 | 0 |
| 44 | 8.0386914   | 8.04176676  | -10.69506696 | h | 1 | 0 |
| 45 | 5.98234632  | 10.60818977 | -11.10368101 | h | 1 | 0 |
| 46 | 7.36978065  | 10.05691671 | -8.0855895   | h | 1 | 0 |
| 47 | -1.70229232 | 9.51486785  | -10.22016252 | h | 1 | 0 |
| 48 | -0.50119928 | 6.47408325  | -10.80025418 | h | 1 | 0 |
| 49 | 1.84326359  | 5.58667039  | -14.63395552 | h | 1 | 0 |

|    |             |             |              |   |   |   |
|----|-------------|-------------|--------------|---|---|---|
| 50 | 3.44019409  | 6.99122428  | -18.80652948 | h | 1 | 0 |
| 51 | 3.40708619  | 11.5574561  | -19.92731702 | h | 1 | 0 |
| 52 | 1.74104045  | 14.69459999 | -16.8462727  | h | 1 | 0 |
| 53 | 0.14178258  | 13.28093643 | -12.68788438 | h | 1 | 0 |
| 54 | 2.30874385  | 8.71156225  | 2.01917232   | h | 1 | 0 |
| 55 | 4.68858608  | 9.75957823  | -0.02431976  | h | 1 | 0 |
| 56 | -0.85843639 | 11.47914818 | -0.23122326  | h | 1 | 0 |
| 57 | 1.54222199  | 12.53767495 | -2.26142788  | h | 1 | 0 |
| 58 | 3.90858883  | 14.33661904 | 1.43895395   | h | 1 | 0 |
| 59 | 1.5837193   | 13.17546836 | 3.49885791   | h | 1 | 0 |
| 60 | 0.82775809  | 17.62654752 | 2.90876062   | h | 1 | 0 |
| 61 | -1.65511256 | 15.97793422 | 1.45749114   | h | 1 | 0 |
| 62 | -0.16322819 | 19.6252152  | -1.19882279  | h | 1 | 0 |
| 63 | 2.89228557  | 18.27880688 | -1.36475719  | h | 1 | 0 |
| 64 | 0.3012574   | 16.75004334 | -2.82367063  | h | 1 | 0 |
| 65 | 2.54568004  | 4.33530926  | 2.83227676   | h | 1 | 0 |
| 66 | 2.6338965   | 1.41941329  | 1.20895983   | h | 1 | 0 |
| 67 | -0.09026243 | 3.35787084  | 0.97696276   | h | 1 | 0 |
| 68 | 11.62806226 | 4.33690558  | -4.4147367   | h | 1 | 0 |
| 69 | 10.94255137 | 6.31220323  | -1.77576926  | h | 1 | 0 |
| 70 | 10.99417031 | 2.99498129  | -1.40475064  | h | 1 | 0 |
| 71 | 5.69993603  | 1.21322588  | -11.92314253 | h | 1 | 0 |
| 72 | 7.07511192  | 4.05587637  | -12.93603048 | h | 1 | 0 |
| 73 | 11.90965378 | 4.58947464  | -12.56513174 | h | 1 | 0 |
| 74 | 15.99490689 | 2.41968547  | -13.20444947 | h | 1 | 0 |
| 75 | 16.22310619 | -2.27475265 | -13.06392882 | h | 1 | 0 |

| 76               | 12.31534704             | -4.77056264 | -12.28940325 | h    | 1                | 0              |
|------------------|-------------------------|-------------|--------------|------|------------------|----------------|
| 77               | 8.22924831              | -2.5972886  | -11.65778809 | h    | 1                | 0              |
| 78               | 6.37957207              | -0.1389158  | -7.60663339  | h    | 1                | 0              |
| <hr/>            |                         |             |              |      |                  |                |
| <b>1b-7</b>      |                         |             |              |      |                  |                |
| <hr/>            |                         |             |              |      |                  |                |
| Center<br>Number | Coordinates (Angstroms) |             |              | Atom | Atomic<br>Number | Atomic<br>Type |
|                  | X                       | Y           | Z            |      |                  |                |
| <hr/>            |                         |             |              |      |                  |                |
| 1                | 2.3139252               | 3.26851345  | -8.1903646   | o    | 8                | 0              |
| 2                | 4.51115864              | 4.01093824  | -8.37551901  | c    | 6                | 0              |
| 3                | 5.04334139              | 6.46358359  | -8.98684193  | n    | 7                | 0              |
| 4                | 7.56599309              | 7.58084914  | -9.14300936  | c    | 6                | 0              |
| 5                | 2.90104063              | 8.24018139  | -9.05350948  | c    | 6                | 0              |
| 6                | 1.11015628              | 7.94354427  | -11.33423236 | c    | 6                | 0              |
| 7                | 2.28944426              | 8.46823554  | -13.88942996 | c    | 6                | 0              |
| 8                | 2.15409344              | 6.65788376  | -15.81747874 | c    | 6                | 0              |
| 9                | 3.1349198               | 7.14436232  | -18.2210673  | c    | 6                | 0              |
| 10               | 4.28743498              | 9.46032629  | -18.73628416 | c    | 6                | 0              |
| 11               | 4.43224563              | 11.28755887 | -16.83554688 | c    | 6                | 0              |
| 12               | 3.43296366              | 10.7971644  | -14.44531188 | c    | 6                | 0              |
| 13               | 1.37480597              | 8.22364243  | -6.57062709  | c    | 6                | 0              |
| 14               | 2.89709649              | 7.91174823  | -4.54297554  | o    | 8                | 0              |
| 15               | 1.7027471               | 7.79408592  | -2.04506814  | c    | 6                | 0              |
| 16               | 2.76329922              | 9.94556809  | -0.43685518  | c    | 6                | 0              |
| 17               | 2.03154401              | 12.57901767 | -1.41517126  | c    | 6                | 0              |
| 18               | 3.10900863              | 14.77240238 | 0.15739793   | c    | 6                | 0              |
| 19               | 2.05164455              | 14.97806412 | 2.85217248   | c    | 6                | 0              |
| 20               | 3.06082296              | 17.28506904 | 4.28302745   | c    | 6                | 0              |

|    |             |             |              |   |   |   |
|----|-------------|-------------|--------------|---|---|---|
| 21 | 2.08580634  | 5.07646156  | -1.01578735  | c | 6 | 0 |
| 22 | 0.34235209  | 4.52849562  | 1.23929526   | c | 6 | 0 |
| 23 | 4.85124777  | 4.5923941   | -0.27892702  | c | 6 | 0 |
| 24 | 6.63537123  | 3.48325563  | -2.28874358  | c | 6 | 0 |
| 25 | 9.28819407  | 2.99180728  | -1.21566729  | c | 6 | 0 |
| 26 | 5.64398515  | 5.17668825  | 1.79777654   | o | 8 | 0 |
| 27 | -0.87201401 | 8.63345921  | -6.46822473  | o | 8 | 0 |
| 28 | 6.67455272  | 2.10323946  | -7.80711837  | c | 6 | 0 |
| 29 | 7.32588968  | 0.46840953  | -10.15965512 | c | 6 | 0 |
| 30 | 8.99661297  | 1.76685725  | -12.0840846  | c | 6 | 0 |
| 31 | 7.97463098  | 3.0283603   | -14.17430353 | c | 6 | 0 |
| 32 | 9.53738964  | 4.27797245  | -15.89505189 | c | 6 | 0 |
| 33 | 12.15357995 | 4.26883202  | -15.55781875 | c | 6 | 0 |
| 34 | 13.19928126 | 3.00124468  | -13.49132528 | c | 6 | 0 |
| 35 | 11.63085541 | 1.76177046  | -11.77141075 | c | 6 | 0 |
| 36 | 5.86811178  | 0.40782957  | -5.78818226  | n | 7 | 0 |
| 37 | 5.48586155  | 1.02485241  | -3.29340572  | c | 6 | 0 |
| 38 | 4.35625652  | -0.41143679 | -1.86901694  | o | 8 | 0 |
| 39 | 3.75556388  | 10.1270881  | -9.12795384  | h | 1 | 0 |
| 40 | -0.32349842 | 8.06935576  | -2.33947021  | h | 1 | 0 |
| 41 | 1.5695612   | 3.81757461  | -2.57247007  | h | 1 | 0 |
| 42 | 6.72665708  | 4.91019981  | -3.79001061  | h | 1 | 0 |
| 43 | 8.39150613  | 3.06156195  | -7.1827833   | h | 1 | 0 |
| 44 | 9.00333155  | 6.13813686  | -9.41882314  | h | 1 | 0 |
| 45 | 7.65349123  | 8.83225371  | -10.78477949 | h | 1 | 0 |
| 46 | 8.00268033  | 8.67744956  | -7.4361215   | h | 1 | 0 |

|    |             |             |              |   |   |   |
|----|-------------|-------------|--------------|---|---|---|
| 47 | -0.4669622  | 9.2437325   | -11.0062647  | h | 1 | 0 |
| 48 | 0.31930453  | 6.04009766  | -11.28027483 | h | 1 | 0 |
| 49 | 1.23943253  | 4.85736429  | -15.4353564  | h | 1 | 0 |
| 50 | 2.98617579  | 5.71666127  | -19.69033048 | h | 1 | 0 |
| 51 | 5.04745879  | 9.84798973  | -20.60383885 | h | 1 | 0 |
| 52 | 5.30417065  | 13.10642725 | -17.22189386 | h | 1 | 0 |
| 53 | 3.51886519  | 12.26351389 | -13.00575148 | h | 1 | 0 |
| 54 | 2.06814175  | 9.67863436  | 1.49446571   | h | 1 | 0 |
| 55 | 4.82654374  | 9.78278698  | -0.32744515  | h | 1 | 0 |
| 56 | -0.03772477 | 12.73792771 | -1.4936767   | h | 1 | 0 |
| 57 | 2.69668521  | 12.77342936 | -3.36940126  | h | 1 | 0 |
| 58 | 2.72386077  | 16.55151926 | -0.84194648  | h | 1 | 0 |
| 59 | 5.17901353  | 14.60467236 | 0.24546167   | h | 1 | 0 |
| 60 | 2.50539619  | 13.26276124 | 3.92541509   | h | 1 | 0 |
| 61 | -0.0214048  | 15.070821   | 2.76201888   | h | 1 | 0 |
| 62 | 2.27858009  | 17.39120038 | 6.19610299   | h | 1 | 0 |
| 63 | 5.1245496   | 17.2167016  | 4.45198892   | h | 1 | 0 |
| 64 | 2.57418856  | 19.04595854 | 3.30515306   | h | 1 | 0 |
| 65 | 0.899432    | 5.619908    | 2.90108169   | h | 1 | 0 |
| 66 | 0.4599644   | 2.52530626  | 1.73137126   | h | 1 | 0 |
| 67 | -1.62381021 | 4.96699078  | 0.76766515   | h | 1 | 0 |
| 68 | 10.57238101 | 2.32007333  | -2.69205711  | h | 1 | 0 |
| 69 | 10.05927391 | 4.71697752  | -0.38645551  | h | 1 | 0 |
| 70 | 9.19088081  | 1.5619367   | 0.27167519   | h | 1 | 0 |
| 71 | 8.2845328   | -1.22248993 | -9.44689979  | h | 1 | 0 |
| 72 | 5.54926358  | -0.15155212 | -11.02715576 | h | 1 | 0 |

|    |             |             |              |   |   |   |
|----|-------------|-------------|--------------|---|---|---|
| 73 | 5.94148379  | 3.05555058  | -14.45356173 | h | 1 | 0 |
| 74 | 8.69846948  | 5.26451862  | -17.48732084 | h | 1 | 0 |
| 75 | 13.37168092 | 5.23470349  | -16.89898614 | h | 1 | 0 |
| 76 | 15.23514095 | 2.96648592  | -13.22496132 | h | 1 | 0 |
| 77 | 12.45794608 | 0.76465889  | -10.17442152 | h | 1 | 0 |
| 78 | 4.7586216   | -1.05900545 | -6.32644185  | h | 1 | 0 |

**1b-8**

| Center<br>Number | Coordinates (Angstroms) |             |              | Atom | Atomic<br>Number | Atomic<br>Type |
|------------------|-------------------------|-------------|--------------|------|------------------|----------------|
|                  | X                       | Y           | Z            |      |                  |                |
| 1                | 2.51822917              | 3.68829774  | -8.22879093  | o    | 8                | 0              |
| 2                | 4.36643022              | 4.97359263  | -8.80804771  | c    | 6                | 0              |
| 3                | 4.13573369              | 7.48994927  | -9.34273275  | n    | 7                | 0              |
| 4                | 6.20169929              | 9.18392929  | -10.0419981  | c    | 6                | 0              |
| 5                | 1.63644282              | 8.64252876  | -8.95861141  | c    | 6                | 0              |
| 6                | -0.28668719             | 8.0011068   | -11.06140458 | c    | 6                | 0              |
| 7                | 0.59600934              | 8.81135474  | -13.65740177 | c    | 6                | 0              |
| 8                | 1.67708093              | 7.06546648  | -15.33199714 | c    | 6                | 0              |
| 9                | 2.5372875               | 7.81875741  | -17.71142786 | c    | 6                | 0              |
| 10               | 2.33292048              | 10.34133795 | -18.45632231 | c    | 6                | 0              |
| 11               | 1.25021463              | 12.10050438 | -16.81176869 | c    | 6                | 0              |
| 12               | 0.38732073              | 11.33736851 | -14.43884962 | c    | 6                | 0              |
| 13               | 0.53034827              | 8.04917406  | -6.33318314  | c    | 6                | 0              |
| 14               | 2.34161801              | 8.05742919  | -4.53435262  | o    | 8                | 0              |
| 15               | 1.60902979              | 7.32613118  | -1.96368579  | c    | 6                | 0              |
| 16               | 2.10771832              | 9.56128668  | -0.20556023  | c    | 6                | 0              |
| 17               | 0.4519538               | 11.87409856 | -0.78505728  | c    | 6                | 0              |



|    |             |             |              |   |   |   |
|----|-------------|-------------|--------------|---|---|---|
| 18 | 0.72041863  | 14.03388027 | 1.14064123   | c | 6 | 0 |
| 19 | 3.32977681  | 15.30349608 | 1.19990587   | c | 6 | 0 |
| 20 | 3.45783244  | 17.52417013 | 3.05522036   | c | 6 | 0 |
| 21 | 3.01277245  | 4.82718401  | -1.34475067  | c | 6 | 0 |
| 22 | 1.94556144  | 3.55859533  | 1.03834817   | c | 6 | 0 |
| 23 | 5.87007729  | 5.24729219  | -1.05001629  | c | 6 | 0 |
| 24 | 7.56858268  | 4.82856516  | -3.37121975  | c | 6 | 0 |
| 25 | 10.37621511 | 5.20214216  | -2.73200769  | c | 6 | 0 |
| 26 | 6.75740614  | 5.99983286  | 0.93253693   | o | 8 | 0 |
| 27 | -1.70891243 | 7.80112419  | -5.94442216  | o | 8 | 0 |
| 28 | 7.01248399  | 3.71870344  | -8.89934061  | c | 6 | 0 |
| 29 | 7.41324376  | 2.51802653  | -11.54231212 | c | 6 | 0 |
| 30 | 9.99553893  | 1.34265473  | -11.90840756 | c | 6 | 0 |
| 31 | 12.10056956 | 2.86101369  | -12.44250039 | c | 6 | 0 |
| 32 | 14.49440424 | 1.79924611  | -12.7418529  | c | 6 | 0 |
| 33 | 14.82095252 | -0.81050659 | -12.51662534 | c | 6 | 0 |
| 34 | 12.73894361 | -2.34460396 | -12.0005685  | c | 6 | 0 |
| 35 | 10.34643379 | -1.27277995 | -11.70346724 | c | 6 | 0 |
| 36 | 7.20468183  | 1.78646051  | -6.95676663  | n | 7 | 0 |
| 37 | 7.13174641  | 2.15352892  | -4.38782997  | c | 6 | 0 |
| 38 | 6.84244142  | 0.37461824  | -2.93185534  | o | 8 | 0 |
| 39 | 1.95567748  | 10.69128516 | -8.96533093  | h | 1 | 0 |
| 40 | -0.41454308 | 6.91075475  | -2.01425591  | h | 1 | 0 |
| 41 | 2.67289674  | 3.59026434  | -2.96643603  | h | 1 | 0 |
| 42 | 6.95867832  | 6.24690706  | -4.7533659   | h | 1 | 0 |
| 43 | 8.5079713   | 5.10576941  | -8.57631219  | h | 1 | 0 |

|    |             |             |              |   |   |   |
|----|-------------|-------------|--------------|---|---|---|
| 44 | 7.76624675  | 8.14431382  | -10.88266046 | h | 1 | 0 |
| 45 | 5.52668219  | 10.51745158 | -11.46681982 | h | 1 | 0 |
| 46 | 6.90396109  | 10.25051254 | -8.40582115  | h | 1 | 0 |
| 47 | -2.06350645 | 8.93390367  | -10.56479537 | h | 1 | 0 |
| 48 | -0.63663031 | 5.96819747  | -11.00236223 | h | 1 | 0 |
| 49 | 1.81780558  | 5.09390112  | -14.77046053 | h | 1 | 0 |
| 50 | 3.35476071  | 6.43217704  | -18.98706081 | h | 1 | 0 |
| 51 | 2.99561414  | 10.93038401 | -20.30807636 | h | 1 | 0 |
| 52 | 1.0619543   | 14.06398264 | -17.38337965 | h | 1 | 0 |
| 53 | -0.48008145 | 12.71493251 | -13.18205806 | h | 1 | 0 |
| 54 | 1.74776001  | 8.92703215  | 1.73552314   | h | 1 | 0 |
| 55 | 4.11423678  | 10.0590179  | -0.27953479  | h | 1 | 0 |
| 56 | -1.53500384 | 11.28155192 | -0.85974907  | h | 1 | 0 |
| 57 | 0.90896546  | 12.5884887  | -2.6796491   | h | 1 | 0 |
| 58 | 0.26543989  | 13.32085151 | 3.03935731   | h | 1 | 0 |
| 59 | -0.71066523 | 15.47749386 | 0.71732995   | h | 1 | 0 |
| 60 | 3.80489076  | 15.96846116 | -0.71043579  | h | 1 | 0 |
| 61 | 4.7827978   | 13.91312473 | 1.70372765   | h | 1 | 0 |
| 62 | 5.33277725  | 18.40102573 | 3.06092431   | h | 1 | 0 |
| 63 | 2.07725673  | 18.99003789 | 2.56702287   | h | 1 | 0 |
| 64 | 3.0497384   | 16.90562319 | 4.99008264   | h | 1 | 0 |
| 65 | 2.42566783  | 4.63312692  | 2.73436636   | h | 1 | 0 |
| 66 | 2.75619845  | 1.66792663  | 1.23448198   | h | 1 | 0 |
| 67 | -0.11107482 | 3.37359846  | 0.91173915   | h | 1 | 0 |
| 68 | 11.54978415 | 5.0241564   | -4.42598047  | h | 1 | 0 |
| 69 | 10.68076627 | 7.06246999  | -1.89105763  | h | 1 | 0 |

|    |             |             |              |   |   |   |
|----|-------------|-------------|--------------|---|---|---|
| 70 | 10.97887219 | 3.77937619  | -1.36226382  | h | 1 | 0 |
| 71 | 5.92185909  | 1.1061472   | -11.81987394 | h | 1 | 0 |
| 72 | 7.09128852  | 3.99056369  | -12.96447467 | h | 1 | 0 |
| 73 | 11.86226273 | 4.89436645  | -12.64228128 | h | 1 | 0 |
| 74 | 16.1016968  | 3.00610365  | -13.16168329 | h | 1 | 0 |
| 75 | 16.68336988 | -1.64137446 | -12.7514994  | h | 1 | 0 |
| 76 | 12.97264216 | -4.37741234 | -11.83192428 | h | 1 | 0 |
| 77 | 8.73195293  | -2.48744947 | -11.32469219 | h | 1 | 0 |
| 78 | 6.67146359  | 0.01389333  | -7.44335615  | h | 1 | 0 |

**1b-9**

| Center<br>Number | Coordinates (Angstroms) |             |              | Atom | Atomic<br>Number | Atomic<br>Type |
|------------------|-------------------------|-------------|--------------|------|------------------|----------------|
|                  | X                       | Y           | Z            |      |                  |                |
| 1                | 2.33563439              | 3.14351683  | -8.17251307  | o    | 8                | 0              |
| 2                | 4.48605932              | 4.02845025  | -8.25343973  | c    | 6                | 0              |
| 3                | 4.88066968              | 6.52828637  | -8.77091158  | n    | 7                | 0              |
| 4                | 7.32980779              | 7.80788535  | -8.78998274  | c    | 6                | 0              |
| 5                | 2.63107766              | 8.16577077  | -8.86272342  | c    | 6                | 0              |
| 6                | 0.94776667              | 7.8313427   | -11.21923114 | c    | 6                | 0              |
| 7                | 2.1736442               | 8.54641381  | -13.70558323 | c    | 6                | 0              |
| 8                | 2.24457056              | 6.81322174  | -15.70688028 | c    | 6                | 0              |
| 9                | 3.27048979              | 7.47206216  | -18.04987327 | c    | 6                | 0              |
| 10               | 4.26138331              | 9.88687512  | -18.42929819 | c    | 6                | 0              |
| 11               | 4.19929324              | 11.63868041 | -16.45433107 | c    | 6                | 0              |
| 12               | 3.15602296              | 10.97514644 | -14.12560146 | c    | 6                | 0              |
| 13               | 1.02204378              | 7.96905999  | -6.44060743  | c    | 6                | 0              |
| 14               | 2.48826858              | 7.67957726  | -4.36888353  | o    | 8                | 0              |

|    |             |             |              |   |   |   |
|----|-------------|-------------|--------------|---|---|---|
| 15 | 1.21643886  | 7.40608586  | -1.92129813  | c | 6 | 0 |
| 16 | 2.08185481  | 9.57038451  | -0.21593835  | c | 6 | 0 |
| 17 | 1.22376247  | 12.18066493 | -1.15075352  | c | 6 | 0 |
| 18 | 1.87641713  | 14.36049692 | 0.66090616   | c | 6 | 0 |
| 19 | 4.71003611  | 14.81631877 | 1.13735325   | c | 6 | 0 |
| 20 | 6.22236544  | 15.51815565 | -1.23225902  | c | 6 | 0 |
| 21 | 1.7383734   | 4.68732565  | -0.95912752  | c | 6 | 0 |
| 22 | -0.0426558  | 3.96134543  | 1.21509173   | c | 6 | 0 |
| 23 | 4.5018167   | 4.35575492  | -0.13632076  | c | 6 | 0 |
| 24 | 6.42386122  | 3.42667976  | -2.11012831  | c | 6 | 0 |
| 25 | 9.06207383  | 3.06548257  | -0.95230426  | c | 6 | 0 |
| 26 | 5.18196182  | 4.92394081  | 1.98435849   | o | 8 | 0 |
| 27 | -1.24811147 | 8.23803354  | -6.40877607  | o | 8 | 0 |
| 28 | 6.74623491  | 2.24386134  | -7.66457987  | c | 6 | 0 |
| 29 | 7.58442654  | 0.73385592  | -10.04139651 | c | 6 | 0 |
| 30 | 9.22941683  | 2.20086219  | -11.86415016 | c | 6 | 0 |
| 31 | 8.19711399  | 3.46456527  | -13.94789649 | c | 6 | 0 |
| 32 | 9.73127968  | 4.86818868  | -15.57285    | c | 6 | 0 |
| 33 | 12.33018593 | 5.01366918  | -15.14545897 | c | 6 | 0 |
| 34 | 13.38720376 | 3.74687963  | -13.08431282 | c | 6 | 0 |
| 35 | 11.84661935 | 2.35327887  | -11.45982456 | c | 6 | 0 |
| 36 | 5.98022778  | 0.43300832  | -5.73220683  | n | 7 | 0 |
| 37 | 5.47239107  | 0.93657894  | -3.23477219  | c | 6 | 0 |
| 38 | 4.39194934  | -0.61858182 | -1.89976231  | o | 8 | 0 |
| 39 | 3.36251351  | 10.10492439 | -8.84635691  | h | 1 | 0 |
| 40 | -0.81150781 | 7.56135809  | -2.28281807  | h | 1 | 0 |

|    |             |             |              |   |   |   |
|----|-------------|-------------|--------------|---|---|---|
| 41 | 1.35727451  | 3.44850869  | -2.5698853   | h | 1 | 0 |
| 42 | 6.47927716  | 4.90634271  | -3.56160696  | h | 1 | 0 |
| 43 | 8.37458427  | 3.28806007  | -6.94704243  | h | 1 | 0 |
| 44 | 8.86538813  | 6.47227257  | -9.07637715  | h | 1 | 0 |
| 45 | 7.38927973  | 9.1339304   | -10.37355024 | h | 1 | 0 |
| 46 | 7.6399333   | 8.85369248  | -7.0245241   | h | 1 | 0 |
| 47 | -0.73261028 | 8.99829704  | -10.90251313 | h | 1 | 0 |
| 48 | 0.29945695  | 5.87464525  | -11.26768734 | h | 1 | 0 |
| 49 | 1.45560558  | 4.93543527  | -15.43180439 | h | 1 | 0 |
| 50 | 3.28349583  | 6.10037367  | -19.57858006 | h | 1 | 0 |
| 51 | 5.05493781  | 10.40827658 | -20.24972133 | h | 1 | 0 |
| 52 | 4.94394806  | 13.53200487 | -16.73489396 | h | 1 | 0 |
| 53 | 3.07816086  | 12.38200184 | -12.62745744 | h | 1 | 0 |
| 54 | 1.31860942  | 9.22720258  | 1.68086858   | h | 1 | 0 |
| 55 | 4.14105446  | 9.50566928  | -0.01882524  | h | 1 | 0 |
| 56 | -0.83068669 | 12.15408522 | -1.43846728  | h | 1 | 0 |
| 57 | 2.04992402  | 12.54719928 | -3.01681716  | h | 1 | 0 |
| 58 | 0.94314366  | 14.01660311 | 2.48394715   | h | 1 | 0 |
| 59 | 1.04028812  | 16.10694335 | -0.08901595  | h | 1 | 0 |
| 60 | 5.55590789  | 13.1446534  | 2.02674991   | h | 1 | 0 |
| 61 | 4.89314298  | 16.34431873 | 2.52854421   | h | 1 | 0 |
| 62 | 8.19005978  | 15.95208834 | -0.75907927  | h | 1 | 0 |
| 63 | 6.24705592  | 13.97917338 | -2.61789432  | h | 1 | 0 |
| 64 | 5.41888355  | 17.18493438 | -2.16604556  | h | 1 | 0 |
| 65 | 0.39474426  | 5.02595768  | 2.9292232    | h | 1 | 0 |
| 66 | 0.17643405  | 1.95238993  | 1.64548248   | h | 1 | 0 |

|    |             |             |              |   |   |   |
|----|-------------|-------------|--------------|---|---|---|
| 67 | -2.01486903 | 4.30127102  | 0.69051289   | h | 1 | 0 |
| 68 | 10.44264925 | 2.54393875  | -2.40162659  | h | 1 | 0 |
| 69 | 9.68298502  | 4.80070544  | -0.02372035  | h | 1 | 0 |
| 70 | 9.00611589  | 1.56956266  | 0.47102365   | h | 1 | 0 |
| 71 | 8.62907573  | -0.91364275 | -9.34717283  | h | 1 | 0 |
| 72 | 5.88286914  | 0.02874712  | -10.99034274 | h | 1 | 0 |
| 73 | 6.17671668  | 3.37173747  | -14.29699889 | h | 1 | 0 |
| 74 | 8.8827893   | 5.85305308  | -17.16104283 | h | 1 | 0 |
| 75 | 13.52657447 | 6.09887809  | -16.41287883 | h | 1 | 0 |
| 76 | 15.41113016 | 3.83304048  | -12.74794865 | h | 1 | 0 |
| 77 | 12.68370821 | 1.35806504  | -9.86694015  | h | 1 | 0 |
| 78 | 4.99531147  | -1.08690701 | -6.35784666  | h | 1 | 0 |

**1b-10**

| Center<br>Number | Coordinates (Angstroms) |             |              | Atom | Atomic<br>Number | Atomic<br>Type |
|------------------|-------------------------|-------------|--------------|------|------------------|----------------|
|                  | X                       | Y           | Z            |      |                  |                |
| 1                | 2.52182108              | 3.95349455  | -8.13512748  | o    | 8                | 0              |
| 2                | 4.47197596              | 5.06469378  | -8.73994065  | c    | 6                | 0              |
| 3                | 4.4787556               | 7.60427404  | -9.21179581  | n    | 7                | 0              |
| 4                | 6.68726441              | 9.10092032  | -9.92551377  | c    | 6                | 0              |
| 5                | 2.12005448              | 8.98960173  | -8.72286141  | c    | 6                | 0              |
| 6                | 0.08297906              | 8.59717294  | -10.77844506 | c    | 6                | 0              |
| 7                | 0.97031355              | 9.38022688  | -13.38134443 | c    | 6                | 0              |
| 8                | 1.82465625              | 7.57826594  | -15.12603921 | c    | 6                | 0              |
| 9                | 2.69047637              | 8.30189315  | -17.51250254 | c    | 6                | 0              |
| 10               | 2.71951413              | 10.85016779 | -18.19421082 | c    | 6                | 0              |
| 11               | 1.86424377              | 12.66630456 | -16.47920162 | c    | 6                | 0              |

|    |             |             |              |   |   |   |
|----|-------------|-------------|--------------|---|---|---|
| 12 | 0.99522418  | 11.933401   | -14.0990426  | c | 6 | 0 |
| 13 | 1.03789023  | 8.44368274  | -6.07721555  | c | 6 | 0 |
| 14 | 2.89365013  | 8.22220304  | -4.3389388   | o | 8 | 0 |
| 15 | 2.16924644  | 7.51772913  | -1.75888607  | c | 6 | 0 |
| 16 | 2.93828263  | 9.65984382  | 0.01750597   | c | 6 | 0 |
| 17 | 1.52045354  | 12.14239935 | -0.47146935  | c | 6 | 0 |
| 18 | 2.23836265  | 14.22262951 | 1.41992038   | c | 6 | 0 |
| 19 | 0.98722126  | 16.79681658 | 0.91830883   | c | 6 | 0 |
| 20 | -1.89371508 | 16.81525148 | 1.23655242   | c | 6 | 0 |
| 21 | 3.33689582  | 4.8814504   | -1.22410187  | c | 6 | 0 |
| 22 | 2.22649531  | 3.68179117  | 1.17499186   | c | 6 | 0 |
| 23 | 6.23018584  | 5.01121096  | -1.02179857  | c | 6 | 0 |
| 24 | 7.79985993  | 4.48055489  | -3.40979062  | c | 6 | 0 |
| 25 | 10.65105313 | 4.56007822  | -2.86487197  | c | 6 | 0 |
| 26 | 7.25375782  | 5.62634759  | 0.94205502   | o | 8 | 0 |
| 27 | -1.20229531 | 8.41508476  | -5.62106786  | o | 8 | 0 |
| 28 | 6.97675371  | 3.55730999  | -8.93732134  | c | 6 | 0 |
| 29 | 7.17945281  | 2.3844972   | -11.61458868 | c | 6 | 0 |
| 30 | 9.6050471   | 0.93823684  | -12.07396878 | c | 6 | 0 |
| 31 | 11.86941359 | 2.22635617  | -12.55953684 | c | 6 | 0 |
| 32 | 14.11957027 | 0.90935166  | -12.9461653  | c | 6 | 0 |
| 33 | 14.13931195 | -1.72928291 | -12.86031445 | c | 6 | 0 |
| 34 | 11.8958776  | -3.03444609 | -12.39417981 | c | 6 | 0 |
| 35 | 9.6481213   | -1.70735252 | -12.00741659 | c | 6 | 0 |
| 36 | 7.03122052  | 1.57150778  | -7.04069419  | n | 7 | 0 |
| 37 | 7.06658157  | 1.88587627  | -4.46403253  | c | 6 | 0 |

|    |             |             |              |   |   |   |
|----|-------------|-------------|--------------|---|---|---|
| 38 | 6.64114012  | 0.11244653  | -3.03510063  | o | 8 | 0 |
| 39 | 2.64247637  | 10.99599067 | -8.69327161  | h | 1 | 0 |
| 40 | 0.11396185  | 7.30438246  | -1.75171636  | h | 1 | 0 |
| 41 | 2.8236287   | 3.71305502  | -2.85122027  | h | 1 | 0 |
| 42 | 7.28756434  | 5.983764    | -4.7406414   | h | 1 | 0 |
| 43 | 8.61129378  | 4.78251396  | -8.63277071  | h | 1 | 0 |
| 44 | 8.10507648  | 7.93809441  | -10.86043744 | h | 1 | 0 |
| 45 | 6.1095568   | 10.55046808 | -11.27775169 | h | 1 | 0 |
| 46 | 7.55140412  | 10.02547328 | -8.28065679  | h | 1 | 0 |
| 47 | -1.57530332 | 9.69190299  | -10.20764617 | h | 1 | 0 |
| 48 | -0.46862417 | 6.60907903  | -10.75391155 | h | 1 | 0 |
| 49 | 1.78250857  | 5.58902124  | -14.61286465 | h | 1 | 0 |
| 50 | 3.33047501  | 6.87353727  | -18.84235304 | h | 1 | 0 |
| 51 | 3.38640681  | 11.41694896 | -20.05143442 | h | 1 | 0 |
| 52 | 1.85777659  | 14.65252443 | -17.00135819 | h | 1 | 0 |
| 53 | 0.3066096   | 13.35842785 | -12.78588299 | h | 1 | 0 |
| 54 | 2.57814009  | 9.02843772  | 1.95871279   | h | 1 | 0 |
| 55 | 4.98207824  | 9.97225484  | -0.10789534  | h | 1 | 0 |
| 56 | -0.52166426 | 11.78891965 | -0.40817172  | h | 1 | 0 |
| 57 | 1.9334261   | 12.80243821 | -2.39581358  | h | 1 | 0 |
| 58 | 4.30069567  | 14.4650831  | 1.39521304   | h | 1 | 0 |
| 59 | 1.76148916  | 13.59527618 | 3.34323858   | h | 1 | 0 |
| 60 | 1.47505317  | 17.42825637 | -0.99964638  | h | 1 | 0 |
| 61 | 1.81507947  | 18.19622426 | 2.2071228    | h | 1 | 0 |
| 62 | -2.66112772 | 18.71706972 | 0.95497621   | h | 1 | 0 |
| 63 | -2.83113796 | 15.56360056 | -0.1187005   | h | 1 | 0 |



|    |             |             |              |   |   |   |
|----|-------------|-------------|--------------|---|---|---|
| 64 | -2.43622471 | 16.1963678  | 3.13840791   | h | 1 | 0 |
| 65 | 2.86488165  | 4.67326936  | 2.86939289   | h | 1 | 0 |
| 66 | 2.85226924  | 1.71758302  | 1.3161971    | h | 1 | 0 |
| 67 | 0.15862936  | 3.7015776   | 1.11481007   | h | 1 | 0 |
| 68 | 11.74238278 | 4.3029978   | -4.6030971   | h | 1 | 0 |
| 69 | 11.16856414 | 6.36236514  | -2.00218164  | h | 1 | 0 |
| 70 | 11.15486828 | 3.0555057   | -1.54353441  | h | 1 | 0 |
| 71 | 5.53496579  | 1.1524272   | -11.88320075 | h | 1 | 0 |
| 72 | 6.98865599  | 3.91815383  | -12.99555942 | h | 1 | 0 |
| 73 | 11.87096469 | 4.28117335  | -12.65049933 | h | 1 | 0 |
| 74 | 15.85448601 | 1.94052104  | -13.32434375 | h | 1 | 0 |
| 75 | 15.88931272 | -2.7586368  | -13.16363507 | h | 1 | 0 |
| 76 | 11.89027579 | -5.08656675 | -12.33402993 | h | 1 | 0 |
| 77 | 7.90521975  | -2.74219    | -11.66618266 | h | 1 | 0 |
| 78 | 6.31647085  | -0.13003728 | -7.54765178  | h | 1 | 0 |

**1b-11**

| Center<br>Number | Coordinates (Angstroms) |            |              | Atom | Atomic<br>Number | Atomic<br>Type |
|------------------|-------------------------|------------|--------------|------|------------------|----------------|
|                  | X                       | Y          | Z            |      |                  |                |
| 1                | 2.57711438              | 4.33792636 | -7.87967243  | o    | 8                | 0              |
| 2                | 4.58590707              | 5.27098265 | -8.58643734  | c    | 6                | 0              |
| 3                | 4.79118154              | 7.79958761 | -9.07229389  | n    | 7                | 0              |
| 4                | 7.083647                | 9.10248983 | -9.89462269  | c    | 6                | 0              |
| 5                | 2.58430727              | 9.38234796 | -8.48644197  | c    | 6                | 0              |
| 6                | 0.42852048              | 9.15715854 | -10.44431743 | c    | 6                | 0              |
| 7                | 1.25777403              | 9.84644605 | -13.09221757 | c    | 6                | 0              |
| 8                | 1.88099918              | 7.96759504 | -14.85345358 | c    | 6                | 0              |

|    |             |             |              |   |   |   |
|----|-------------|-------------|--------------|---|---|---|
| 9  | 2.68999965  | 8.60018425  | -17.2850789  | c | 6 | 0 |
| 10 | 2.8924713   | 11.13246057 | -17.99646106 | c | 6 | 0 |
| 11 | 2.26859164  | 13.02522893 | -16.26488236 | c | 6 | 0 |
| 12 | 1.45573044  | 12.38360097 | -13.83903658 | c | 6 | 0 |
| 13 | 1.58242884  | 8.9363873   | -5.79052145  | c | 6 | 0 |
| 14 | 3.48755118  | 8.57039458  | -4.13522824  | o | 8 | 0 |
| 15 | 2.82854141  | 7.92938674  | -1.51960457  | c | 6 | 0 |
| 16 | 3.87984992  | 9.99279359  | 0.20893506   | c | 6 | 0 |
| 17 | 2.75840177  | 12.63932994 | -0.21937124  | c | 6 | 0 |
| 18 | -0.07049556 | 12.89892227 | 0.37519331   | c | 6 | 0 |
| 19 | -1.02559484 | 15.62711747 | 0.1458645    | c | 6 | 0 |
| 20 | -3.84981713 | 15.89957805 | 0.72475886   | c | 6 | 0 |
| 21 | 3.79033047  | 5.20153421  | -1.02867153  | c | 6 | 0 |
| 22 | 2.69665683  | 4.10611021  | 1.42791413   | c | 6 | 0 |
| 23 | 6.69012758  | 5.0704863   | -0.96727252  | c | 6 | 0 |
| 24 | 8.08894358  | 4.40325946  | -3.42623598  | c | 6 | 0 |
| 25 | 10.95989883 | 4.23764831  | -3.02143015  | c | 6 | 0 |
| 26 | 7.85983872  | 5.5865696   | 0.94273264   | o | 8 | 0 |
| 27 | -0.63238299 | 9.09321037  | -5.23814126  | o | 8 | 0 |
| 28 | 6.93320966  | 3.54647437  | -8.90047395  | c | 6 | 0 |
| 29 | 6.89617675  | 2.36035973  | -11.578418   | c | 6 | 0 |
| 30 | 9.15134417  | 0.69402761  | -12.14764525 | c | 6 | 0 |
| 31 | 11.51014249 | 1.7642391   | -12.70763816 | c | 6 | 0 |
| 32 | 13.60468587 | 0.24136599  | -13.19801338 | c | 6 | 0 |
| 33 | 13.37060954 | -2.38775756 | -13.14364465 | c | 6 | 0 |
| 34 | 11.03048169 | -3.47656262 | -12.6041236  | c | 6 | 0 |

|    |             |             |              |   |   |   |
|----|-------------|-------------|--------------|---|---|---|
| 35 | 8.93937906  | -1.94377542 | -12.11228835 | c | 6 | 0 |
| 36 | 6.90464174  | 1.56429224  | -6.99945562  | n | 7 | 0 |
| 37 | 7.08500766  | 1.87932402  | -4.42905072  | c | 6 | 0 |
| 38 | 6.57450926  | 0.15244334  | -2.9714774   | o | 8 | 0 |
| 39 | 3.27581595  | 11.33708182 | -8.49396896  | h | 1 | 0 |
| 40 | 0.76804     | 7.87989074  | -1.41689137  | h | 1 | 0 |
| 41 | 3.09706403  | 4.0807191   | -2.62231099  | h | 1 | 0 |
| 42 | 7.64325091  | 5.94302156  | -4.73900944  | h | 1 | 0 |
| 43 | 8.68363365  | 4.6207522   | -8.68360389  | h | 1 | 0 |
| 44 | 8.36807162  | 7.81444608  | -10.8578488  | h | 1 | 0 |
| 45 | 6.57364549  | 10.57305521 | -11.25168025 | h | 1 | 0 |
| 46 | 8.07869351  | 9.97948329  | -8.29867997  | h | 1 | 0 |
| 47 | -1.10132124 | 10.39423208 | -9.80925541  | h | 1 | 0 |
| 48 | -0.29071941 | 7.22432258  | -10.37628441 | h | 1 | 0 |
| 49 | 1.70103779  | 5.9923588   | -14.31648722 | h | 1 | 0 |
| 50 | 3.14952298  | 7.11459487  | -18.62688269 | h | 1 | 0 |
| 51 | 3.51467861  | 11.6287731  | -19.88905375 | h | 1 | 0 |
| 52 | 2.39812384  | 15.00131257 | -16.8090157  | h | 1 | 0 |
| 53 | 0.94573739  | 13.86979291 | -12.51207074 | h | 1 | 0 |
| 54 | 3.53600927  | 9.40740823  | 2.1671585    | h | 1 | 0 |
| 55 | 5.93694358  | 10.07155827 | -0.00648673  | h | 1 | 0 |
| 56 | 3.10920111  | 13.22445933 | -2.17999259  | h | 1 | 0 |
| 57 | 3.82004341  | 13.97285294 | 0.96548465   | h | 1 | 0 |
| 58 | -0.4336611  | 12.2092969  | 2.30309316   | h | 1 | 0 |
| 59 | -1.1730093  | 11.69401651 | -0.90202464  | h | 1 | 0 |
| 60 | -0.64514874 | 16.32144279 | -1.77467148  | h | 1 | 0 |

|    |             |             |              |   |   |   |
|----|-------------|-------------|--------------|---|---|---|
| 61 | 0.06600291  | 16.84825289 | 1.4230738    | h | 1 | 0 |
| 62 | -4.47420071 | 17.86482518 | 0.54427676   | h | 1 | 0 |
| 63 | -4.9915428  | 14.75337684 | -0.56878849  | h | 1 | 0 |
| 64 | -4.28212592 | 15.27839566 | 2.65346671   | h | 1 | 0 |
| 65 | 3.50209194  | 5.0377112   | 3.0849253    | h | 1 | 0 |
| 66 | 3.1526278   | 2.09424252  | 1.54779853   | h | 1 | 0 |
| 67 | 0.63785154  | 4.30856314  | 1.46890437   | h | 1 | 0 |
| 68 | 11.93805127 | 3.88056592  | -4.80895284  | h | 1 | 0 |
| 69 | 11.67274801 | 5.99136745  | -2.19926465  | h | 1 | 0 |
| 70 | 11.39661013 | 2.70001288  | -1.71430511  | h | 1 | 0 |
| 71 | 5.13367097  | 1.28623118  | -11.7623584  | h | 1 | 0 |
| 72 | 6.78241695  | 3.90577021  | -12.95508219 | h | 1 | 0 |
| 73 | 11.70928278 | 3.81048276  | -12.77363108 | h | 1 | 0 |
| 74 | 15.41633511 | 1.10509838  | -13.6316878  | h | 1 | 0 |
| 75 | 14.99928904 | -3.57679889 | -13.52757393 | h | 1 | 0 |
| 76 | 10.82714432 | -5.51922907 | -12.56776955 | h | 1 | 0 |
| 77 | 7.11861501  | -2.81014632 | -11.71188186 | h | 1 | 0 |
| 78 | 6.02495125  | -0.07053409 | -7.46476836  | h | 1 | 0 |

**1b-12**

| Center<br>Number | Coordinates (Angstroms) |            |              | Atom | Atomic<br>Number | Atomic<br>Type |
|------------------|-------------------------|------------|--------------|------|------------------|----------------|
|                  | X                       | Y          | Z            |      |                  |                |
| 1                | 2.51966412              | 3.82083178 | -8.19952574  | o    | 8                | 0              |
| 2                | 4.39938347              | 5.01424358 | -8.86748471  | c    | 6                | 0              |
| 3                | 4.24729548              | 7.51486565 | -9.49524154  | n    | 7                | 0              |
| 4                | 6.35605066              | 9.10473885 | -10.30155577 | c    | 6                | 0              |
| 5                | 1.80160314              | 8.77325389 | -9.09816482  | c    | 6                | 0              |

|    |             |             |              |   |   |   |
|----|-------------|-------------|--------------|---|---|---|
| 6  | -0.1964459  | 8.12197877  | -11.12656738 | c | 6 | 0 |
| 7  | 0.64742117  | 8.79859799  | -13.77316437 | c | 6 | 0 |
| 8  | 1.6338706   | 6.95380123  | -15.39952342 | c | 6 | 0 |
| 9  | 2.45775482  | 7.58349149  | -17.82709319 | c | 6 | 0 |
| 10 | 2.31087693  | 10.07912705 | -18.66980787 | c | 6 | 0 |
| 11 | 1.32259076  | 11.93592121 | -17.07393882 | c | 6 | 0 |
| 12 | 0.49640764  | 11.29633835 | -14.6520433  | c | 6 | 0 |
| 13 | 0.74372083  | 8.32448283  | -6.42424913  | c | 6 | 0 |
| 14 | 2.6016107   | 8.34104421  | -4.67304306  | o | 8 | 0 |
| 15 | 1.91443792  | 7.7472076   | -2.05491549  | c | 6 | 0 |
| 16 | 2.58820218  | 10.01891219 | -0.40476943  | c | 6 | 0 |
| 17 | 0.99613438  | 12.3750391  | -0.98562479  | c | 6 | 0 |
| 18 | 1.6937383   | 14.70094512 | 0.61071391   | c | 6 | 0 |
| 19 | 1.13988086  | 14.44824969 | 3.44881395   | c | 6 | 0 |
| 20 | 1.72060632  | 16.87002256 | 4.92728565   | c | 6 | 0 |
| 21 | 3.20518821  | 5.20206281  | -1.37566045  | c | 6 | 0 |
| 22 | 2.12264988  | 4.06742884  | 1.06762925   | c | 6 | 0 |
| 23 | 6.08477569  | 5.4907358   | -1.14538531  | c | 6 | 0 |
| 24 | 7.71282806  | 4.92840411  | -3.48674519  | c | 6 | 0 |
| 25 | 10.54739942 | 5.198922    | -2.91819117  | c | 6 | 0 |
| 26 | 7.04694248  | 6.2502661   | 0.79885832   | o | 8 | 0 |
| 27 | -1.49139845 | 8.17261241  | -5.96920844  | o | 8 | 0 |
| 28 | 6.99634685  | 3.66090672  | -8.96275031  | c | 6 | 0 |
| 29 | 7.31025273  | 2.36227358  | -11.57126253 | c | 6 | 0 |
| 30 | 9.84843471  | 1.09612967  | -11.94353499 | c | 6 | 0 |
| 31 | 11.98329505 | 2.52895041  | -12.58453261 | c | 6 | 0 |

|    |             |             |              |   |   |   |
|----|-------------|-------------|--------------|---|---|---|
| 32 | 14.33876424 | 1.38632699  | -12.89046031 | c | 6 | 0 |
| 33 | 14.59588572 | -1.22051281 | -12.56488403 | c | 6 | 0 |
| 34 | 12.48306776 | -2.67051254 | -11.94164233 | c | 6 | 0 |
| 35 | 10.1294281  | -1.51787062 | -11.6378293  | c | 6 | 0 |
| 36 | 7.1527794   | 1.78686092  | -6.96120187  | n | 7 | 0 |
| 37 | 7.13939748  | 2.24362524  | -4.40507644  | c | 6 | 0 |
| 38 | 6.79619742  | 0.52939053  | -2.8849872   | o | 8 | 0 |
| 39 | 2.19427156  | 10.80708497 | -9.19507837  | h | 1 | 0 |
| 40 | -0.12873821 | 7.43866701  | -2.02749102  | h | 1 | 0 |
| 41 | 2.77412797  | 3.92993852  | -2.94762161  | h | 1 | 0 |
| 42 | 7.1335927   | 6.32676953  | -4.90199946  | h | 1 | 0 |
| 43 | 8.54619282  | 5.00233657  | -8.70881486  | h | 1 | 0 |
| 44 | 7.87052482  | 7.97611614  | -11.11860034 | h | 1 | 0 |
| 45 | 5.70218162  | 10.39719897 | -11.7734154  | h | 1 | 0 |
| 46 | 7.12138149  | 10.21730766 | -8.72541463  | h | 1 | 0 |
| 47 | -1.92519414 | 9.13870876  | -10.6247055  | h | 1 | 0 |
| 48 | -0.61727582 | 6.10721455  | -10.97842728 | h | 1 | 0 |
| 49 | 1.7287536   | 5.00307898  | -14.76101165 | h | 1 | 0 |
| 50 | 3.20240482  | 6.12219728  | -19.06328911 | h | 1 | 0 |
| 51 | 2.94460697  | 10.57226576 | -20.55939656 | h | 1 | 0 |
| 52 | 1.17919848  | 13.87962833 | -17.72130106 | h | 1 | 0 |
| 53 | -0.29673519 | 12.74961436 | -13.43209143 | h | 1 | 0 |
| 54 | 2.33388542  | 9.45282001  | 1.56973539   | h | 1 | 0 |
| 55 | 4.60271174  | 10.45688637 | -0.61714663  | h | 1 | 0 |
| 56 | -1.01626807 | 11.93463227 | -0.72102645  | h | 1 | 0 |
| 57 | 1.21932697  | 12.85435888 | -2.99027346  | h | 1 | 0 |

|    |             |             |              |   |   |   |
|----|-------------|-------------|--------------|---|---|---|
| 58 | 0.65212434  | 16.34077183 | -0.12346872  | h | 1 | 0 |
| 59 | 3.70834963  | 15.1388797  | 0.34435887   | h | 1 | 0 |
| 60 | 2.24163943  | 12.88446687 | 4.25015264   | h | 1 | 0 |
| 61 | -0.85741307 | 13.93983309 | 3.70807519   | h | 1 | 0 |
| 62 | 1.31055392  | 16.64385873 | 6.94324933   | h | 1 | 0 |
| 63 | 3.71703393  | 17.39489006 | 4.7487191    | h | 1 | 0 |
| 64 | 0.59326476  | 18.4626601  | 4.23011695   | h | 1 | 0 |
| 65 | 2.68155586  | 5.17482586  | 2.71772907   | h | 1 | 0 |
| 66 | 2.84878095  | 2.1488714   | 1.31716054   | h | 1 | 0 |
| 67 | 0.05794031  | 3.97419568  | 0.98003689   | h | 1 | 0 |
| 68 | 11.67448445 | 4.91441399  | -4.62911315  | h | 1 | 0 |
| 69 | 10.95108367 | 7.07041762  | -2.14677744  | h | 1 | 0 |
| 70 | 11.11776719 | 3.79660177  | -1.5140027   | h | 1 | 0 |
| 71 | 5.77113588  | 0.9892164   | -11.77558147 | h | 1 | 0 |
| 72 | 7.00701988  | 3.79638877  | -13.03579292 | h | 1 | 0 |
| 73 | 11.79827973 | 4.55842119  | -12.86364953 | h | 1 | 0 |
| 74 | 15.96988477 | 2.52758237  | -13.39354331 | h | 1 | 0 |
| 75 | 16.4280213  | -2.11483919 | -12.80536522 | h | 1 | 0 |
| 76 | 12.66244578 | -4.70078664 | -11.69461492 | h | 1 | 0 |
| 77 | 8.49052731  | -2.66820055 | -11.17318021 | h | 1 | 0 |
| 78 | 6.52482621  | 0.02683703  | -7.37574754  | h | 1 | 0 |

**1b-13**

| Center<br>Number | Coordinates (Angstroms) |            |             | Atom | Atomic<br>Number | Atomic<br>Type |
|------------------|-------------------------|------------|-------------|------|------------------|----------------|
|                  | X                       | Y          | Z           |      |                  |                |
| 1                | 2.53297443              | 3.7058866  | -8.19297033 | o    | 8                | 0              |
| 2                | 4.38076349              | 5.00795518 | -8.73470231 | c    | 6                | 0              |

|    |             |             |              |   |   |   |
|----|-------------|-------------|--------------|---|---|---|
| 3  | 4.14494524  | 7.53185448  | -9.23040907  | n | 7 | 0 |
| 4  | 6.21314886  | 9.24332273  | -9.87989119  | c | 6 | 0 |
| 5  | 1.63695001  | 8.66769159  | -8.85246962  | c | 6 | 0 |
| 6  | -0.25781071 | 8.06013047  | -10.99044837 | c | 6 | 0 |
| 7  | 0.649864    | 8.93356165  | -13.55724169 | c | 6 | 0 |
| 8  | 1.74796148  | 7.22980937  | -15.26359734 | c | 6 | 0 |
| 9  | 2.6325467   | 8.04207293  | -17.61458349 | c | 6 | 0 |
| 10 | 2.43544343  | 10.5823498  | -18.29859671 | c | 6 | 0 |
| 11 | 1.33555587  | 12.30022064 | -16.62202028 | c | 6 | 0 |
| 12 | 0.44895601  | 11.4784002  | -14.2776766  | c | 6 | 0 |
| 13 | 0.50224623  | 8.01818814  | -6.25278126  | c | 6 | 0 |
| 14 | 2.2906432   | 8.00754049  | -4.43113329  | o | 8 | 0 |
| 15 | 1.53198187  | 7.22004599  | -1.8846271   | c | 6 | 0 |
| 16 | 1.97731527  | 9.42808668  | -0.07864391  | c | 6 | 0 |
| 17 | 0.30442062  | 11.7312006  | -0.64383691  | c | 6 | 0 |
| 18 | 0.51019549  | 13.85191388 | 1.33591951   | c | 6 | 0 |
| 19 | 3.13029748  | 15.0850753  | 1.61581143   | c | 6 | 0 |
| 20 | 4.0811259   | 16.4232128  | -0.7723024   | c | 6 | 0 |
| 21 | 2.95817479  | 4.72739618  | -1.29412579  | c | 6 | 0 |
| 22 | 1.88413612  | 3.40710363  | 1.05763237   | c | 6 | 0 |
| 23 | 5.80781666  | 5.17364848  | -0.96670012  | c | 6 | 0 |
| 24 | 7.53350253  | 4.7977558   | -3.27533677  | c | 6 | 0 |
| 25 | 10.33158565 | 5.18128262  | -2.60130562  | c | 6 | 0 |
| 26 | 6.66803295  | 5.91362972  | 1.03243135   | o | 8 | 0 |
| 27 | -1.73970581 | 7.74673855  | -5.89697592  | o | 8 | 0 |
| 28 | 7.03287957  | 3.76599413  | -8.82407475  | c | 6 | 0 |



|    |             |             |              |   |   |   |
|----|-------------|-------------|--------------|---|---|---|
| 29 | 7.45605861  | 2.60464671  | -11.48100333 | c | 6 | 0 |
| 30 | 10.04206466 | 1.43628695  | -11.84334248 | c | 6 | 0 |
| 31 | 12.15402817 | 2.96462624  | -12.31861364 | c | 6 | 0 |
| 32 | 14.55054106 | 1.9078693   | -12.61369619 | c | 6 | 0 |
| 33 | 14.87288285 | -0.70669784 | -12.44421396 | c | 6 | 0 |
| 34 | 12.78413248 | -2.25032299 | -11.98734908 | c | 6 | 0 |
| 35 | 10.3889737  | -1.18334377 | -11.69338994 | c | 6 | 0 |
| 36 | 7.22035867  | 1.80689649  | -6.90809283  | n | 7 | 0 |
| 37 | 7.12561284  | 2.1348388   | -4.33484634  | c | 6 | 0 |
| 38 | 6.8392467   | 0.33221066  | -2.90761581  | o | 8 | 0 |
| 39 | 1.94792205  | 10.7172758  | -8.81474425  | h | 1 | 0 |
| 40 | -0.48524513 | 6.78068052  | -1.97110183  | h | 1 | 0 |
| 41 | 2.64646217  | 3.51434696  | -2.93928258  | h | 1 | 0 |
| 42 | 6.92848848  | 6.2318796   | -4.64329995  | h | 1 | 0 |
| 43 | 8.52008998  | 5.15474009  | -8.47167256  | h | 1 | 0 |
| 44 | 7.77738287  | 8.22639153  | -10.74872007 | h | 1 | 0 |
| 45 | 5.54000634  | 10.61545919 | -11.2681678  | h | 1 | 0 |
| 46 | 6.91540998  | 10.26441573 | -8.21495393  | h | 1 | 0 |
| 47 | -2.04651632 | 8.97007748  | -10.49414302 | h | 1 | 0 |
| 48 | -0.59472018 | 6.02412292  | -10.98008922 | h | 1 | 0 |
| 49 | 1.88325345  | 5.24476246  | -14.75007924 | h | 1 | 0 |
| 50 | 3.4639871   | 6.68768947  | -18.91552589 | h | 1 | 0 |
| 51 | 3.11700943  | 11.21710173 | -20.12826052 | h | 1 | 0 |
| 52 | 1.152407    | 14.27723179 | -17.14673752 | h | 1 | 0 |
| 53 | -0.42997065 | 12.82488941 | -12.99540098 | h | 1 | 0 |
| 54 | 1.59709374  | 8.75464991  | 1.84534086   | h | 1 | 0 |

|    |             |             |              |   |   |   |
|----|-------------|-------------|--------------|---|---|---|
| 55 | 3.9793404   | 9.94939115  | -0.11294628  | h | 1 | 0 |
| 56 | -1.67560142 | 11.12142448 | -0.75377327  | h | 1 | 0 |
| 57 | 0.77048711  | 12.47371142 | -2.52255556  | h | 1 | 0 |
| 58 | -0.06985678 | 13.09860535 | 3.18205499   | h | 1 | 0 |
| 59 | -0.87088676 | 15.3282917  | 0.86140298   | h | 1 | 0 |
| 60 | 4.51991464  | 13.66606375 | 2.21281482   | h | 1 | 0 |
| 61 | 3.03332205  | 16.46211631 | 3.16450421   | h | 1 | 0 |
| 62 | 5.88913838  | 17.36991142 | -0.42565884  | h | 1 | 0 |
| 63 | 4.36857244  | 15.09862866 | -2.33748284  | h | 1 | 0 |
| 64 | 2.73158121  | 17.86106649 | -1.41090971  | h | 1 | 0 |
| 65 | 2.34108744  | 4.45607034  | 2.77598435   | h | 1 | 0 |
| 66 | 2.71067322  | 1.52076972  | 1.22655537   | h | 1 | 0 |
| 67 | -0.16975268 | 3.2057802   | 0.91176268   | h | 1 | 0 |
| 68 | 11.52388382 | 5.03696456  | -4.28544486  | h | 1 | 0 |
| 69 | 10.61368425 | 7.03077967  | -1.72926244  | h | 1 | 0 |
| 70 | 10.93022044 | 3.74218673  | -1.24697581  | h | 1 | 0 |
| 71 | 5.96812717  | 1.19611259  | -11.79115935 | h | 1 | 0 |
| 72 | 7.14434278  | 4.09795396  | -12.88389336 | h | 1 | 0 |
| 73 | 11.91931011 | 5.00218384  | -12.47516894 | h | 1 | 0 |
| 74 | 16.16350388 | 3.12258839  | -12.98643828 | h | 1 | 0 |
| 75 | 16.73736402 | -1.53361001 | -12.6765892  | h | 1 | 0 |
| 76 | 13.01465128 | -4.28664698 | -11.86242249 | h | 1 | 0 |
| 77 | 8.76954231  | -2.40471361 | -11.36021063 | h | 1 | 0 |
| 78 | 6.71007918  | 0.03650822  | -7.42588845  | h | 1 | 0 |

1b-14

| Center<br>Number | Coordinates (Angstroms) | Atom | Atomic<br>Number | Atomic<br>Type |
|------------------|-------------------------|------|------------------|----------------|
|------------------|-------------------------|------|------------------|----------------|

|    | X          | Y           | Z            |   |   |   |
|----|------------|-------------|--------------|---|---|---|
| 1  | 2.23594536 | 3.65872422  | -7.95092901  | o | 8 | 0 |
| 2  | 4.50170026 | 4.14706152  | -8.15217258  | c | 6 | 0 |
| 3  | 5.31461643 | 6.56526691  | -8.56158754  | n | 7 | 0 |
| 4  | 7.95187274 | 7.38060085  | -8.70317217  | c | 6 | 0 |
| 5  | 3.40680525 | 8.58409097  | -8.39199216  | c | 6 | 0 |
| 6  | 1.52545907 | 8.70376266  | -10.61654914 | c | 6 | 0 |
| 7  | 2.68438724 | 9.31430102  | -13.16204582 | c | 6 | 0 |
| 8  | 2.28722936 | 7.70719253  | -15.2288718  | c | 6 | 0 |
| 9  | 3.24946253 | 8.28996326  | -17.6185812  | c | 6 | 0 |
| 10 | 4.64532899 | 10.49855463 | -17.98067915 | c | 6 | 0 |
| 11 | 5.05223731 | 12.12402329 | -15.93995263 | c | 6 | 0 |
| 12 | 4.07182778 | 11.5401337  | -13.56285645 | c | 6 | 0 |
| 13 | 1.96540054 | 8.54217752  | -5.8585993   | c | 6 | 0 |
| 14 | 3.46735573 | 7.80748379  | -3.93265042  | o | 8 | 0 |
| 15 | 2.32836384 | 7.60209438  | -1.41187906  | c | 6 | 0 |
| 16 | 3.67187857 | 9.47035977  | 0.33703669   | c | 6 | 0 |
| 17 | 3.30749357 | 12.26992971 | -0.35973115  | c | 6 | 0 |
| 18 | 0.5833265  | 13.240558   | -0.10308026  | c | 6 | 0 |
| 19 | 0.29662985 | 16.1036113  | -0.52116037  | c | 6 | 0 |
| 20 | 0.8936889  | 16.98097347 | -3.21928864  | c | 6 | 0 |
| 21 | 2.43543076 | 4.77852084  | -0.63123001  | c | 6 | 0 |
| 22 | 0.71659007 | 4.23315009  | 1.64410359   | c | 6 | 0 |
| 23 | 5.14741994 | 3.91738298  | -0.05665413  | c | 6 | 0 |
| 24 | 6.72272499 | 2.79025173  | -2.22496393  | c | 6 | 0 |
| 25 | 9.32211586 | 1.88274514  | -1.30312739  | c | 6 | 0 |

|    |             |             |              |   |   |   |
|----|-------------|-------------|--------------|---|---|---|
| 26 | 6.07044268  | 4.22121264  | 2.02593752   | o | 8 | 0 |
| 27 | -0.19314175 | 9.26875391  | -5.63267203  | o | 8 | 0 |
| 28 | 6.43056944  | 1.95074326  | -7.84089351  | c | 6 | 0 |
| 29 | 6.81933438  | 0.47990068  | -10.35394508 | c | 6 | 0 |
| 30 | 8.59074745  | 1.744401    | -12.20956756 | c | 6 | 0 |
| 31 | 11.21211166 | 1.40652744  | -11.98142196 | c | 6 | 0 |
| 32 | 12.87937328 | 2.60729046  | -13.63434745 | c | 6 | 0 |
| 33 | 11.94721335 | 4.16911795  | -15.54812679 | c | 6 | 0 |
| 34 | 9.34381095  | 4.51050382  | -15.8012062  | c | 6 | 0 |
| 35 | 7.68105839  | 3.29933566  | -14.14813639 | c | 6 | 0 |
| 36 | 5.47650684  | 0.180326    | -5.95580068  | n | 7 | 0 |
| 37 | 5.25075791  | 0.5937721   | -3.40141568  | c | 6 | 0 |
| 38 | 3.99905852  | -0.82904987 | -2.06816108  | o | 8 | 0 |
| 39 | 4.4825435   | 10.35583442 | -8.3474059   | h | 1 | 0 |
| 40 | 0.33785765  | 8.10341436  | -1.61531458  | h | 1 | 0 |
| 41 | 1.72458332  | 3.72883761  | -2.26412894  | h | 1 | 0 |
| 42 | 6.94998702  | 4.32976449  | -3.59416588  | h | 1 | 0 |
| 43 | 8.26604574  | 2.63540178  | -7.1955143   | h | 1 | 0 |
| 44 | 9.19167093  | 5.81266405  | -9.18095684  | h | 1 | 0 |
| 45 | 8.14853613  | 8.77851693  | -10.2122459  | h | 1 | 0 |
| 46 | 8.56900406  | 8.22973426  | -6.91301164  | h | 1 | 0 |
| 47 | 0.12709201  | 10.14493023 | -10.1159038  | h | 1 | 0 |
| 48 | 0.51500957  | 6.90776613  | -10.69420794 | h | 1 | 0 |
| 49 | 1.18137198  | 5.99454385  | -14.96588069 | h | 1 | 0 |
| 50 | 2.89633604  | 7.0224628   | -19.19585904 | h | 1 | 0 |
| 51 | 5.39121931  | 10.96176864 | -19.83663745 | h | 1 | 0 |

|    |             |             |              |   |   |   |
|----|-------------|-------------|--------------|---|---|---|
| 52 | 6.1150796   | 13.8613023  | -16.20492438 | h | 1 | 0 |
| 53 | 4.3659463   | 12.85523304 | -12.00933099 | h | 1 | 0 |
| 54 | 2.98056916  | 9.14037654  | 2.26299295   | h | 1 | 0 |
| 55 | 5.6932443   | 9.0246683   | 0.37686588   | h | 1 | 0 |
| 56 | 3.99839348  | 12.58189849 | -2.28976086  | h | 1 | 0 |
| 57 | 4.54027168  | 13.39671161 | 0.87364749   | h | 1 | 0 |
| 58 | -0.11263196 | 12.77091756 | 1.79723382   | h | 1 | 0 |
| 59 | -0.64614451 | 12.24724451 | -1.44539787  | h | 1 | 0 |
| 60 | 1.50854593  | 17.12252598 | 0.82384584   | h | 1 | 0 |
| 61 | -1.6515386  | 16.64301316 | -0.057441    | h | 1 | 0 |
| 62 | 0.51343809  | 19.00306187 | -3.4479206   | h | 1 | 0 |
| 63 | 2.88073364  | 16.66899689 | -3.70948812  | h | 1 | 0 |
| 64 | -0.26203463 | 15.95916268 | -4.60234426  | h | 1 | 0 |
| 65 | 1.46584094  | 5.08469252  | 3.36880963   | h | 1 | 0 |
| 66 | 0.59967013  | 2.19254825  | 1.94592866   | h | 1 | 0 |
| 67 | -1.19507071 | 4.94959855  | 1.30742639   | h | 1 | 0 |
| 68 | 10.47839016 | 1.21732228  | -2.88439675  | h | 1 | 0 |
| 69 | 10.31607495 | 3.41247202  | -0.33839289  | h | 1 | 0 |
| 70 | 9.0887382   | 0.33084245  | 0.0390177    | h | 1 | 0 |
| 71 | 7.57990837  | -1.37386535 | -9.83270939  | h | 1 | 0 |
| 72 | 4.95995291  | 0.1629243   | -11.21160702 | h | 1 | 0 |
| 73 | 11.94899249 | 0.17961338  | -10.50474933 | h | 1 | 0 |
| 74 | 14.90210313 | 2.31460624  | -13.43536926 | h | 1 | 0 |
| 75 | 13.24209194 | 5.10560022  | -16.83720137 | h | 1 | 0 |
| 76 | 8.59414522  | 5.72763521  | -17.27403678 | h | 1 | 0 |
| 77 | 5.65997374  | 3.58602675  | -14.35990869 | h | 1 | 0 |

|    |            |             |            |   |   |   |
|----|------------|-------------|------------|---|---|---|
| 78 | 4.18423731 | -1.08889639 | -6.5810889 | h | 1 | 0 |
|----|------------|-------------|------------|---|---|---|

---
